# Supplementary material for: Association of acculturation with cardiac structure and function among Hispanics/Latinos: a cross-sectional analysis of the echocardiographic study of Latinos
Source: PubMed Central journal article supplement — BMJ Open. 2019 Nov 28;9(11):e028729. doi: 10.1136/bmjopen-2018-028729 (PMC6924788; doi:10.1136/bmjopen-2018-028729), 2019-11-28
Supplement: bmjopen-2018-028729.draft_revisions.pdf [file bmjopen-2018-028729.draft_revisions.pdf]

# BMJ Open

BMJ Open is committed to open peer review. As part of this commitment we make the peer review history of every article we publish publicly available.

When an article is published we post the peer reviewers' comments and the authors' responses online. We also post the versions of the paper that were used during peer review. These are the versions that the peer review comments apply to.

The versions of the paper that follow are the versions that were submitted during the peer review process. They are not the versions of record or the final published versions. They should not be cited or distributed as the published version of this manuscript.

BMJ Open is an open access journal and the full, final, typeset and author-corrected version of record of the manuscript is available on our site with no access controls, subscription charges or pay-per-view fees (<http://bmjopen.bmj.com>).

If you have any questions on BMJ Open's open peer review process please email [info.bmjopen@bmj.com](mailto:info.bmjopen@bmj.com)

# BMJ Open

## Association of Acculturation with Cardiac Structure and Function among Hispanic/Latinos: the Echocardiographic Study of Latinos

|                               |                                                                                                                                                                                                                                                                                                                                                                                                                                                                          |
|-------------------------------|--------------------------------------------------------------------------------------------------------------------------------------------------------------------------------------------------------------------------------------------------------------------------------------------------------------------------------------------------------------------------------------------------------------------------------------------------------------------------|
| Journal:                      | <i>BMJ Open</i>                                                                                                                                                                                                                                                                                                                                                                                                                                                          |
| Manuscript ID                 | bmjopen-2018-028729                                                                                                                                                                                                                                                                                                                                                                                                                                                      |
| Article Type:                 | Research                                                                                                                                                                                                                                                                                                                                                                                                                                                                 |
| Date Submitted by the Author: | 20-Dec-2018                                                                                                                                                                                                                                                                                                                                                                                                                                                              |
| Complete List of Authors:     | Lopez, Lenny<br>Swett, Katrina<br>Rodriguez, Fatima<br>Kizer, Jorge R.; Albert Einstein Coll Med<br>Penedo, Frank<br>Gallo, Linda; San Diego State University, Department of Psychology<br>Allison, Matthew; 1University of California San Diego, Family Medicine and Public Health<br>Arguelles, William; University of Miami, Department of Psychology<br>Gonzalez, Franklyn<br>Kaplan, Robert C.; Albert Einstein College of Medicine,<br>Rodriguez, Carlos Rodriguez |
| Keywords:                     | Heart failure < CARDIOLOGY, SOCIAL MEDICINE, EPIDEMIOLOGY, Echocardiography < CARDIOLOGY                                                                                                                                                                                                                                                                                                                                                                                 |
|                               |                                                                                                                                                                                                                                                                                                                                                                                                                                                                          |

SCHOLARONE™  
Manuscripts

## Association of Acculturation with Cardiac Structure and Function among Hispanic/Latinos: the Echocardiographic Study of Latinos

**Short Title:** Acculturation and Cardiac Structure and Function

### Address for correspondence

Lenny López, MD, MPH, MDiv. Division of Hospital Medicine, University of California San Francisco – San Francisco VA Medical Center. 4150 Clement St, San Francisco CA, 94121. (lenny.lopez@ucsf.edu). Phone: 617-270-6600.

### Contributing authors:

1. Lenny López, MD, MPH, MDiv. Division of Hospital Medicine, University of California San Francisco – San Francisco VA Medical Center, San Francisco, CA. (lenny.lopez@ucsf.edu).
2. Katrina Swett, MS. Division of Public Health Sciences, Wake Forest School of Medicine, Winston-Salem, NC. (kswett@wakehealth.edu).
3. Fátima Rodríguez, MD, MPH. Division of Cardiovascular Medicine, Stanford University, Palo Alto, CA. (frodrigu@stanford.edu).
4. Jorge R. Kizer, MD. Division of Cardiology, Albert Einstein College of Medicine, Bronx, NY. (jorge.kizer@einstein.yu.edu).
5. Frank J. Penedo, PhD. Department of Medical Social Sciences, Feinberg School of Medicine, Northwestern University, Chicago, Illinois. (frank.penedo@northwestern.edu).
6. Linda C. Gallo, PhD. Department of Psychology, San Diego State University, San Diego, CA. (lgallo@mail.sdsu.edu).
7. Matthew A. Allison, MD, MPH, FAHA. Division of Preventive Medicine, University of California San Diego, San Diego, CA. (mallison@ucsd.edu).
8. William Arguelles, PhD. Center for Research and Grants, Baptist Health South Florida, Miami, FL. (warguelles@psy.miami.edu).
9. Franklyn Gonzalez, MS. Department of Biostatistics, University of North Carolina, Chapel Hill, NC. (fgonzale@email.unc.edu).
10. Robert Kaplan, PhD. Department of Epidemiology & Population Health, Albert Einstein College of Medicine, Bronx, NY. (robert.kaplan@einstein.yu.edu).
11. Carlos J. Rodríguez, MD, MPH. Division of Public Health Sciences, Wake Forest School of Medicine, Winston-Salem, NC. (crodrigu@wakehealth.edu).

Manuscript Word Count: 2,632

Number of Tables: 3

Number of Figures: 1

Number of Supplemental Tables: 2

### Strengths and limitations of this study

- A population-based cohort study among predominantly immigrant Hispanic/Latinos in the United States.
- A detailed comprehensive echocardiographic examination was used to determine cardiac structure and function in every participant.
- Determined whether sociocultural factors, such as acculturation contribute to the heart failure risk factor burden among an immigrant population.
- We are specifically referring to acculturation into the US culture which may not be generalizable to acculturation in other settings.

For peer review only

## Abstract

**Background:** Hispanics/Latinos, the largest immigrant population in the US, have a large burden of heart failure risk. There is a paucity of research regarding the impact of acculturation on cardiac structure and function.

**Methods:** In the Echocardiographic Study of Latinos, 1,818 Hispanic adult participants underwent assessment of left atrial volume index (LAVI), left ventricular mass index (LVMI), early diastolic transmitral inflow and mitral annular velocities. Acculturation was measured by the Short Acculturation Scale, nativity, immigration age, length of US residence, generation status, and language.

**Results:** The study population was predominantly Spanish-speaking and foreign-born with mean US residence of 22.7 years, mean age of 56.4 years; 50% had hypertension, 28% had diabetes, and 44% had a BMI >30kg/m<sup>2</sup>. Multivariable analyses demonstrated higher LAVI with increasing years of US residence. Foreign-born and first generation participants had higher E/e' but lower LAVI and e' velocities compared to the second generation. Higher acculturation and income >\$20K were associated with higher LVMI, LAVI, and E/e', but lower e' velocities. Preferential Spanish-speakers with an income <\$20K had a higher E/e'.

**Conclusions:** Acculturation was associated with abnormal cardiac structure and function, with some effect modification seen according to socioeconomic status.

**Abstract Word Count:** 193

**Keywords:** Acculturation, Echocardiogram, Hispanics/Latinos, Socioeconomic Status

1  
2  
3 Cardiovascular disease (CVD) and heart failure (HF) risk factor burden is high among  
4  
5 Hispanic/Latinos in the United States (US)<sup>1</sup> leading to abnormalities of cardiac structure and  
6  
7 function<sup>2</sup> which have been associated with incident clinical HF,<sup>3</sup> incident CVD and increased  
8  
9 mortality.<sup>4-7</sup>  
10  
11

12  
13  
14 With respect to HF, Hispanics/Latinos have a higher incidence of HF compared to Non-Hispanic  
15  
16 Whites and Hispanics/Latinos who present with HF are younger with more co-morbidities and a  
17  
18 lower left ventricular ejection fraction.<sup>8-10</sup> Beyond traditional HF risk factors, unique  
19  
20 sociocultural factors such as acculturation, may contribute to HF risk among Hispanic/Latinos  
21  
22 **(Figure/Conceptual Model).**<sup>9</sup> The fact that Hispanics/Latinos are the largest immigrant  
23  
24 population in the US affords the ideal opportunity to study the impact of acculturation on cardiac  
25  
26 parameters. Acculturation is a multidimensional process whereby an immigrant culture adopts  
27  
28 the beliefs and practices of a host culture with both positive and negative effects that may  
29  
30 differentially influence CVD development.<sup>11</sup> Higher acculturation has been associated with  
31  
32 increased psychosocial stress, deleterious cardiovascular health behaviors and a higher CV risk  
33  
34 factor burden.<sup>12-14</sup> To our knowledge, there is only one prior study<sup>15</sup> demonstrating that lower  
35  
36 acculturation was associated with a greater risk of HF re-hospitalization.  
37  
38  
39  
40  
41  
42  
43  
44

45 We sought primarily to test whether acculturation, as an important bio-sociocultural variable, is  
46  
47 associated with cardiac structure and function among Hispanics/Latinos. Studies often overlook  
48  
49 socioeconomic status (SES) as an interconnected correlate with acculturation. Because SES is  
50  
51 associated with cardiac parameters<sup>16</sup> and modifies the association between acculturation and  
52  
53  
54  
55  
56  
57  
58  
59  
60

1  
2  
3 other health-related variables,<sup>17</sup> secondarily, we sought to test whether our primary associations  
4 are moderated by SES.  
5  
6  
7  
8  
9

## 10 **Methods**

### 11 **Cohort Description**

12  
13 The Hispanic Community Health Study/Study of Latinos (HCHS/SOL) is a population-based  
14 study of 16,415 Hispanic/Latinos from randomly selected households at four US field centers  
15 (Bronx, NY; Chicago, IL; Miami, FL; and San Diego, CA).<sup>18</sup> Probability sampling was used to  
16 ensure broad representation of the target population and to minimize the sources of bias that may  
17 otherwise enter into the cohort selection and recruitment process. Participants were between 18  
18 and 74 years of age, and self-identified as Cuban, Central American, Dominican, Mexican,  
19 Puerto Rican, or South American Hispanic/Latino heritage. The ECHO-SOL ancillary study was  
20 designed to provide echocardiographic parameters characterizing cardiac structure and function  
21 in a representative HCHS/SOL baseline subsample of 1,818 participants  $\geq 45$  years old.<sup>2,19</sup> The  
22 Institutional Review Board approval was obtained at each study site and oversight of all study all  
23 ECHO-SOL participants gave informed consent.  
24  
25  
26  
27  
28  
29  
30  
31  
32  
33  
34  
35  
36  
37  
38  
39  
40  
41  
42

### 43 **In-Person Examination**

44 The examination protocol for the parent HCHS/SOL has been previously published.<sup>12</sup> Obesity  
45 was defined as a body mass index (BMI)  $\geq 30.0$  kg/m<sup>2</sup>. Seated resting blood pressures were  
46 measured in triplicate and the average of the 2<sup>nd</sup> and 3<sup>rd</sup> readings was used for analysis. Type 2  
47 diabetes was defined based on American Diabetes Association definition using one or more of  
48 the following criteria: 1) fasting serum glucose  $\geq 126$  mg/dl, 2) oral glucose tolerance test  $\geq 200$   
49  
50  
51  
52  
53  
54  
55  
56  
57  
58  
59  
60

1  
2  
3 mg/dl, 3) self-reported diabetes, 4) Hb A1C  $\geq$ 6.5%, or 5) taking anti-diabetic medication or  
4  
5 insulin. Renal function was measured by estimated glomerular filtration rate (eGFR). Physical  
6  
7 activity levels, categorized as low or medium/high, were assessed using the Global Physical  
8  
9 Activity Questionnaire.<sup>20</sup> Self-report questionnaires assessed smoking status (no/ever/current),  
10  
11 alcohol consumption (current/no), and insurance coverage (yes/no) and type  
12  
13 (Private/Medicare/Medicaid). Socioeconomic status was defined as highest degree or level of  
14  
15 school completed and household income level – dichotomized as  $<$ \$20,000 and  $>$ \$20,000, given  
16  
17 the low number of participants with incomes  $>$ \$40,000. Our secondary analysis focused on  
18  
19 income rather than education because education was completed prior to migration for most  
20  
21 immigrants in our study population and current income while living in the US may more  
22  
23 relevantly impact on a participant's acculturative process, acting as a proxy for the participant's  
24  
25 ability to integrate and be exposed to mainstream US contexts. Marital status categorized as  
26  
27 (single/married/partnered/separated/divorced/widowed).  
28  
29  
30  
31  
32  
33  
34

### 35 **Primary Echocardiographic Measurements**

36  
37 Trained sonographers performed transthoracic echocardiography examinations, including 2D  
38  
39 imaging, and spectral, color and tissue Doppler.<sup>19</sup> The following measured and derived cardiac  
40  
41 variables utilized in this study were: left ventricular mass index (LVMI), relative wall thickness  
42  
43 (RWT) and LV Ejection Fraction (LVEF) as per American Society of Echocardiography  
44  
45 guidelines.<sup>21</sup> Per guidelines, diastolic function was defined using three echocardiographic  
46  
47 parameters: 1) peak early (E) and late (A) diastolic transmitral inflow velocities; 2) early  
48  
49 diastolic (e') annular velocities (the average of septal and lateral annular velocities were used); 3)  
50  
51 left atrial volume indexed (LAVI) to body surface area.<sup>22</sup>  
52  
53  
54  
55  
56  
57  
58  
59  
60



## Acculturation Measures

Acculturation was measured by six variables. First, nativity was classified as either born or not outside the US mainland (50 states) and those born in Puerto Rico or other US territories were classified as born outside the US mainland to better reflect their migration and acculturation experiences. Second, foreign-born individuals were asked the number of years lived in the US and categorized as <5, 5-10, 11-20, >20 years. We used Marin's Short Acculturation Scale for Hispanics (SASH),<sup>23</sup> which has a two-factor structure and the two subscales (items related to language use [e.g., language they speak, think] as the SASH language subscale; items related to media preference and social affiliations [e.g., language of media programs watched; ethnicity of close friends] as the SASH social relations subscale) were analyzed separately in our models with higher scores representing higher acculturation. Fifth, language preference was categorized as English vs. Spanish based on language of interview. Finally, generational status (first vs. higher generation) was collected as well as age at the time of migration to the US.

## Statistical Analyses

Sampling weights were used to obtain weighted frequencies of descriptive variables and population estimates in the ECHO-SOL target population. We used means  $\pm$  standard errors (SEs) for continuous variables and proportions for categorical variables. LVMI, RWT, LVEF, e' annular velocities and LAVI were analyzed as continuous variables. LV diastolic dysfunction (LVDD) was analyzed as a binary variable (present vs. absent).<sup>2</sup> Acculturation variables were categorical (foreign- vs. US-born; 1<sup>st</sup> generation vs. 2<sup>nd</sup>; Spanish language preference vs. English), ordinal (<5, 5-10, 11-20, and >20 years in the US) and continuous measures (age at

1  
2  
3 immigration and SASH subscales). Means were compared across categorical acculturation  
4 variables using ANOVA for each measure of cardiac structure (LVMI, RWT, LAVI) and  
5 function (LVEF,  $e'$ ,  $E/e'$ ). Only significant unadjusted associations for our measures of  
6 acculturation were explored in multivariable analysis. Unadjusted and multivariable separate  
7 linear and logistic regression analyses were used for our continuous and categorical acculturation  
8 variables respectively with each dependent variable measure of cardiac structure and function  
9 with sequential modeling for age and sex followed by models including clinical covariates  
10 (diabetes, hypertension, and obesity), and behavioral characteristics (physical activity, tobacco  
11 use, and alcohol use). For years in the US, we compared >20 years to <5 years as well as an  
12 overall comparison across each category of years in the US. We tested effect moderation with  
13 income through the use of interaction terms in models followed by stratified analyses by income  
14 for statistically significant interactions at the  $p < 0.01$  level. All other statistical tests were 2-sided  
15 at a significance level of 0.05. All reported values were weighted to account for the HCHS/SOL  
16 sampling probability design, stratification, clustering and nonresponse and to make the estimates  
17 applicable to the target population from which the HCHS/SOL sample was drawn. All analyses  
18 were performed with SAS 9.3 (SAS Institute, Cary, NC)

### 39 **Patient and public involvement**

40  
41 No patients were involved in the development of the research question or design of this cohort  
42 study.  
43  
44

### 47 **Results**

48  
49 Fifty-seven percent of the study population were women; almost half had a reported annual  
50 income under \$20K; over half were married and most had some type of health insurance (mostly  
51 Medicaid and/or Medicare). Hypertension and diabetes were prevalent in half and almost one-  
52  
53  
54  
55  
56  
57

1  
2  
3 third of the study population respectively. Most of the study population was foreign-born, only  
4  
5 14% preferred English, almost half had been in the US >20 years with a mean age of migration  
6  
7 of 34 years of age, signifying that the majority came to the US as adults (**Table 1**). Mean values  
8  
9 of echocardiographic variables (LAVI, RWT, LVMI, LVEF) are all within normal limits for this  
10  
11 study population. However, mean e' annular velocities and E/e' ratio are borderline abnormal.  
12  
13  
14 Some degree of diastolic dysfunction was seen in over half of the study population but this has  
15  
16 been previously described.<sup>2</sup>  
17  
18  
19  
20

21 **Table S1** shows unadjusted relationships between acculturation measures and echocardiographic  
22  
23 characteristics. LAVI significantly increased with increasing years in the US whereas RWT  
24  
25 appeared to have a bimodal distribution. A significantly lower annular relaxation velocity and  
26  
27 higher E/e' ratio was seen among the foreign-born compared to US-born and among those 1<sup>st</sup>  
28  
29 generation compared to 2<sup>nd</sup> generation. Increasing acculturation as measured by increasing  
30  
31 SASH language scale was associated with increasing LAVI. Younger age of migration to US  
32  
33 was associated with higher RWT and increased LAVI.  
34  
35  
36  
37  
38  
39

40 Adjusted analyses (**Table 2**) demonstrated significantly lower RWT and increased LAVI with  
41  
42 increasing years in the US. A significantly higher E/e' ratio was seen among the foreign-born  
43  
44 participants. Those 1<sup>st</sup> generation had lower LAVI, lower e' annular velocities and higher E/e'  
45  
46 ratios compared to 2<sup>nd</sup> generation. Increasing SASH language scale was associated with  
47  
48 increasing LAVI. Lower age of migration to US was associated with increased LAVI. These  
49  
50 associations persisted in sequential models adjusted for clinical factors and behavioral factors  
51  
52 both separately and together. Although greater odds of LVDD was seen in unadjusted  
53  
54  
55  
56  
57  
58  
59  
60

1  
2  
3 associations with nativity, generational status, SASH language, and age of immigration (**Table**  
4  
5 **3**), these associations did not persist on adjusted analysis.  
6  
7

8  
9  
10 Significant interactions ( $p < 0.01$ ) were found between our main exposure (acculturation) and  
11  
12 income on the effect of cardiac structure and function. Among those whose annual income is  
13  
14  $> \$20K$ , increasing years in the US was associated with increased LVMI, lower  $e'$  annular  
15  
16 velocities, and higher  $E/e'$  ratio. Generational status was associated with increased LAVI among  
17  
18 those making  $> \$20K$  annually. However, being a preferential Spanish-speaker carried a  
19  
20 significantly higher  $E/e'$  ratio among those making  $< \$20K$ . (**Table S2**).  
21  
22  
23  
24  
25  
26

## 27 **Discussion**

28  
29 Hispanics/Latinos in the US represent a relatively young demographic such that the future public  
30  
31 health burden of HF as this population ages is potentially underestimated. Acculturation is  
32  
33 complex, and HCHS-SOL has demonstrated significant heterogeneity in CVD risk factor burden  
34  
35 among Hispanics/Latinos by country of origin and acculturation measures.<sup>12</sup> Despite the limited  
36  
37 understanding of HF risk among Hispanics/Latinos,<sup>9,24</sup> our analysis of multidimensional  
38  
39 validated acculturation scales provides several important contributions. First, increasing  
40  
41 acculturation, an important phenomenon among immigrant populations, is associated with  
42  
43 abnormal cardiac structure and function in a predominately foreign-born, Spanish-speaking adult  
44  
45 study population despite long residence in the US. Second, different dimensions of acculturation  
46  
47 had varying associations with echocardiographic measures of structure and function. Finally,  
48  
49 income significantly moderated these associations. These findings suggest that exposure to the  
50  
51 social and environmental sources of acculturative stress may promote unhealthy behaviors<sup>25</sup> or  
52  
53  
54  
55  
56  
57

1  
2  
3 act via currently undefined pathways to contribute to HF risk among Hispanics/Latinos. Further  
4  
5 elucidating the acculturative factors influencing HF risk in Hispanics/Latinos is warranted.  
6  
7  
8  
9

10 Although to our knowledge, there is no existing literature on the association between  
11  
12 acculturation and HF risk, our study found several measures of acculturation (increasing years of  
13  
14 US residence, English preference, and younger age at immigration) were associated with  
15  
16 abnormal cardiac structure and function (increased LAVI, increased LVMI, increased RWT,  
17  
18 lower annular e' relaxation velocity and higher E/e' ratio). Our multivariable models did not  
19  
20 fully account for the deleterious effects of acculturation. An increased E/e' ratio, LAVI, and  
21  
22 LVMI are markers of chronically-elevated filling pressures associated with impaired cardiac  
23  
24 relaxation and HF with preserved ejection fraction.<sup>26,27</sup> The presence of measures of abnormal  
25  
26 cardiac structure and function have been associated with increased HF hospitalizations,  
27  
28 cardiovascular death and improved CV risk prediction.<sup>27-29</sup> Importantly, these abnormalities are  
29  
30 additive, with worse outcomes seen in individuals with more than one alteration.<sup>27</sup> In order to  
31  
32 identify preclinical CV disease, abnormalities in cardiac structure and function determined by  
33  
34 echocardiography are important intermediary measures, many of which have been associated  
35  
36 with incident CVD, incident clinical HF and increased mortality.<sup>4-6</sup> Given the high burden of  
37  
38 acculturation among Hispanics/Latinos, echocardiography might help to identify a particularly  
39  
40 high risk subset of participants.  
41  
42  
43  
44  
45  
46  
47  
48

49 LVM is associated with CVD, sudden cardiac death, and all-cause mortality.<sup>26</sup> Among foreign-  
50  
51 born Hispanics/Latinos, we found increased LVMI with increasing years in the US. Our study is  
52  
53 consistent with prior studies showing a high prevalence of LVM among Hispanics/Latinos  
54  
55  
56  
57  
58  
59  
60

1  
2  
3 especially among low income Hispanics/Latinos with increasing years of US residence.<sup>30-32</sup>  
4  
5 Prior studies have demonstrated that adjustment for socioeconomic factors did not fully account  
6  
7 for the presence of increased LVMI among Hispanics/Latinos<sup>33</sup> possibly due to the residual  
8  
9 effect of acculturation. Changes in LVM can occur without overt clinical hypertension in  
10  
11 adrenergic states, such as chronic stress<sup>34</sup> with psychosocial factors such as perceived  
12  
13 discrimination and low social support.<sup>35,36</sup> Acculturative stress, an inability to navigate the  
14  
15 immigrant process and make decisions on retaining one's native culture while adapting to a new  
16  
17 culture, may negatively affect mental and physical health through unhealthy and risky  
18  
19 behaviors<sup>25</sup> but also increase rates of anxiety, depression, perceived discrimination and lack of  
20  
21 social support<sup>14,25,37</sup> which may all lead to cardiac structural and functional abnormalities and  
22  
23 increased HF risk.  
24  
25  
26  
27  
28  
29  
30

31 The interaction of acculturation with SES on cardiac measures may shed light on the "Hispanic  
32  
33 paradox" which states that Hispanics/Latinos, a disproportionately low SES group, have lower  
34  
35 overall mortality and cardiovascular mortality compared to non-Hispanic Whites.<sup>9</sup> Low SES is a  
36  
37 composite chronic psychological stressor encompassing multiple factors (e.g., work, housing and  
38  
39 material factors) as well as unmeasured behavioral and situational stress features. Longitudinal  
40  
41 studies have shown an inverse association gradient between SES level and adverse outcomes.<sup>35</sup>  
42  
43 Studies have shown that low SES and racial/ethnic minority status may combine synergistically  
44  
45 to create high burdens of stress that accumulate over time, leading to deleterious health  
46  
47 consequences.<sup>38</sup> However, our study provides additional information, that is those with higher  
48  
49 SES (defined as annual incomes >\$20K) exhibited more deleterious effects of increasing  
50  
51 acculturation on cardiac structural and functional measures. There may be more acculturative  
52  
53  
54  
55  
56  
57  
58  
59  
60

1  
2  
3 stress for higher-SES immigrants, perhaps through increased contact and interaction with the  
4 mainstream culture, which may contribute to our findings. *Familismo* is a culture-specific factor  
5 characterized by having strong bonds with nuclear and extended family members resulting in a  
6 high level of perceived family support and associated with some indicators of improved  
7 health.<sup>39,40</sup> Studies suggest that increasing acculturation may erode the protective nature of  
8 *familismo*.<sup>40-42</sup> Further, as Hispanics acculturate into a more individualistic society, dimensions  
9 of *familismo* such as familial obligations may increase psychosocial stress rather than alleviate it.  
10 For example, a participant may agree that an aging parent should live with relatives, but having a  
11 limited income to provide such living arrangements may impart a negative psychosocial stress.  
12  
13  
14  
15  
16  
17  
18  
19  
20  
21  
22  
23  
24  
25

26 Several limitations of this analysis should be noted. First, this study is cross-sectional and  
27 precludes mechanistic causal inference, so our findings warrant replication and longitudinal  
28 follow up. Secondly, participants resided in one of four US cities, precluding generalizability to  
29 all US Hispanic/Latinos. Our study demonstrates cardiac structure and function abnormalities in  
30 a relatively young cohort with a high burden of traditional CVD factors. While this study is one  
31 of the largest studies of acculturation with cardiac structure and function in any population, the  
32 sample size is modest; thus we are underpowered to perform stratified analyses by national  
33 origin in order to characterize the heterogeneity within Hispanic/Latinos. We are specifically  
34 referring to acculturation into the US culture which may not be generalizable to acculturation in  
35 other settings. Finally, although the ECHO- SOL cohort does not include a non-Hispanic White  
36 comparison group, our study focuses on unique intra-ethnic phenomena, as prior research  
37 confirms inter-racial/ethnic differences.  
38  
39  
40  
41  
42  
43  
44  
45  
46  
47  
48  
49  
50  
51  
52  
53  
54  
55  
56  
57  
58  
59  
60

## **Conclusions**

In addition to traditional CV risk factors, acculturation may explain the disproportionate burden of HF risk among Hispanics/Latinos. Our study found significant associations between acculturation measures and deleterious cardiac structural and functional changes among low-SES, foreign-born Hispanic/Latinos with increasing years of residence in the US. Abnormal cardiac structure and function is known to increase the risk of incident clinical HF. Further elucidation of how acculturation impacts risk is warranted in order to possibly risk stratify a high-risk subgroup of Hispanics/Latinos and also to inform the development of culturally-appropriate interventions for Hispanics/Latinos and other immigrants.



1  
2  
3 **Acknowledgements:** The authors thank the staff and participants of HCHS/SOL and ECHO-  
4 SOL for their important contributions. Investigators website - <http://www.csc.unc.edu/hchs/>  
5  
6

7 **Contributors: Research Conception and design:** CJR, LL; **Collection and assembly of data:**  
8 CJR, MAA, RK, LCG; **Analysis and interpretation of the data:** CJR, LL, KS; **Drafting of the**  
9 **article:** CJR, LL, FR; **Critical revision of the article for important intellectual content:** CJR,  
10 LL, FR, JRK, FJP, LCG, WA, FG; **Obtaining of funding:** CJR, RK, MAA; **Statistical**  
11 **expertise:** KS, FG  
12  
13  
14

15  
16 CJR and LL are responsible for the overall content as guarantors.  
17

18 **Funding:** This study supported by contracts from the National Heart, Lung, and Blood Institute  
19 (NHLBI) to the University of North Carolina (N01-HC65233), University of Miami (N01-  
20 HC65234), Albert Einstein College of Medicine (N01-HC65235), Northwestern University  
21 (N01-HC65236), and San Diego State University (N01-HC65237). The following institutes  
22 contributed to HCHS/SOL: National Institute on Minority Health and Health Disparities,  
23 National Institute on Deafness and Other Communication Disorders, National Institute of Dental  
24 and Craniofacial Research, National Institute of Diabetes and Digestive and Kidney Diseases,  
25 National Institute of Neurological Disorders and Stroke, NIH Institution-Office of Dietary  
26 Supplements.  
27  
28  
29

30  
31  
32  
33 ECHO-SOL was supported by the National Heart, Lung, and Blood Institute  
34 (R01 HL104199, Epidemiologic Determinants of Cardiac Structure and Function among  
35 Hispanics: Carlos J. Rodriguez, MD, MPH Principal Investigator). Dr. Lenny L. López  
36 acknowledges the support of the Robert Wood Johnson Foundation Harold Amos Medical  
37 Faculty Development Program and NIDDK 1K23DK098280-01. No relationships with industry  
38 supported this work.  
39  
40  
41  
42  
43

44 **Competing interests:** None declared.  
45

46 **Patient consent for publication:** Not required.  
47

48  
49 **Ethics approval:** The Institutional Review Board at the Wake Forest School of Medicine and at  
50 each study site provided approval and oversight of all study materials and activities.  
51

52  
53 **Data sharing statement:** Data is publically available on request.  
54  
55  
56  
57

## **REFERENCES**

1. Mozaffarian D, Benjamin EJ, Go AS, et al. Heart Disease and Stroke Statistics—2015 Update: A Report From the American Heart Association. *Circulation* 2015;131:e29-e322.
2. Mehta H, Armstrong A, Swett K, et al. Burden of Systolic and Diastolic Left Ventricular Dysfunction Among Hispanics in the United States: Insights From the Echocardiographic Study of Latinos. *Circ Heart Fail* 2016;9.
3. Yancy CW, Jessup M, Bozkurt B, et al. 2013 ACCF/AHA guideline for the management of heart failure: a report of the American College of Cardiology Foundation/American Heart Association Task Force on Practice Guidelines. *J Am Coll Cardiol* 2013;62:e147-239.
4. Hobbs FD, Roalfe AK, Davis RC, Davies MK, Hare R, Midlands Research Practices C. Prognosis of all-cause heart failure and borderline left ventricular systolic dysfunction: 5 year mortality follow-up of the Echocardiographic Heart of England Screening Study (ECHOES). *Eur Heart J* 2007;28:1128-34.
5. Armstrong AC, Jacobs DR, Jr., Gidding SS, et al. Framingham score and LV mass predict events in young adults: CARDIA study. *Int J Cardiol* 2014;172:350-5.
6. Bombelli M, Facchetti R, Cuspidi C, et al. Prognostic significance of left atrial enlargement in a general population: results of the PAMELA study. *Hypertension* 2014;64:1205-11.
7. Echouffo-Tcheugui JB, Erqou S, Butler J, Yancy CW, Fonarow GC. Assessing the Risk of Progression From Asymptomatic Left Ventricular Dysfunction to Overt Heart Failure: A Systematic Overview and Meta-Analysis. *JACC Heart Fail* 2016;4:237-48.
8. Vivo RP, Krim SR, Cevik C, Witteles RM. Heart failure in Hispanics. *Journal of the American College of Cardiology* 2009;53:1167-75.
9. Rodriguez CJ, Allison M, Daviglius ML, et al. Status of cardiovascular disease and stroke in Hispanics/Latinos in the United States: a science advisory from the American Heart Association. *Circulation* 2014;130:593-625.
10. Bahrami H, Kronmal R, Bluemke DA, et al. Differences in the incidence of congestive heart failure by ethnicity: the multi-ethnic study of atherosclerosis. *Archives of internal medicine* 2008;168:2138-45.
11. Zambrana RE, Carter-Pokras O. Role of acculturation research in advancing science and practice in reducing health care disparities among Latinos. *Am J Public Health* 2010;100:18-23.

12. Daviglius ML, Talavera GA, Aviles-Santa ML, et al. Prevalence of major cardiovascular risk factors and cardiovascular diseases among Hispanic/Latino individuals of diverse backgrounds in the United States. *Jama* 2012;308:1775-84.
13. Ayala GX, Baquero B, Klinger S. A systematic review of the relationship between acculturation and diet among Latinos in the United States: implications for future research. *J Am Diet Assoc* 2008;108:1330-44.
14. Steptoe A, Kivimaki M. Stress and cardiovascular disease: an update on current knowledge. *Annu Rev Public Health* 2013;34:337-54.
15. Peterson PN, Campagna EJ, Maravi M, et al. Acculturation and outcomes among patients with heart failure. *Circ Heart Fail* 2012;5:160-6.
16. Rodriguez CJ, Sciacca RR, Diez-Roux AV, et al. Relation between socioeconomic status, race-ethnicity, and left ventricular mass: the Northern Manhattan study. *Hypertension* 2004;43:775-9.
17. Lee H, Cardinal BJ, Loprinzi PD. Effects of socioeconomic status and acculturation on accelerometer-measured moderate-to-vigorous physical activity among Mexican American adolescents: findings from NHANES 2003-2004. *J Phys Act Health* 2012;9:1155-62.
18. Lavange LM, Kalsbeek WD, Sorlie PD, et al. Sample design and cohort selection in the Hispanic Community Health Study/Study of Latinos. *Ann Epidemiol* 2010;20:642-9.
19. Rodriguez CJ, Dharod A, Allison MA, et al. Rationale and Design of the Echocardiographic Study of Hispanics/Latinos (ECHO-SOL). *Ethnicity & disease* 2015;25:180-6.
20. Cleland CL, Hunter RF, Kee F, Cupples ME, Sallis JF, Tully MA. Validity of the global physical activity questionnaire (GPAQ) in assessing levels and change in moderate-vigorous physical activity and sedentary behaviour. *BMC Public Health* 2014;14:1255.
21. Lang RM, Bierig M, Devereux RB, et al. Recommendations for chamber quantification: a report from the American Society of Echocardiography's Guidelines and Standards Committee and the Chamber Quantification Writing Group, developed in conjunction with the European Association of Echocardiography, a branch of the European Society of Cardiology. *Journal of the American Society of Echocardiography* : official publication of the American Society of Echocardiography 2005;18:1440-63.

- 1  
2  
3 22. Ommen SR, Nishimura RA, Appleton CP, et al. Clinical utility of Doppler  
4 echocardiography and tissue Doppler imaging in the estimation of left ventricular filling  
5 pressures: A comparative simultaneous Doppler-catheterization study. *Circulation*  
6 2000;102:1788-94.  
7  
8  
9  
10 23. Marin G, Sabogal F, Marin BV, Otero-Sabogal F, and Perez-Stable E. Development of a  
11 short acculturation scale for Hispanics. *Hispanic Journal of Behavioral Sciences* 1987;9:183-205.  
12  
13 24. Vivo RP, Krim SR, Cevik C, Witteles RM. Heart failure in Hispanics. *J Am Coll Cardiol*  
14 2009;53:1167-75.  
15  
16  
17 25. Lara M, Gamboa C, Kahramanian MI, Morales LS, Bautista DE. Acculturation and  
18 Latino health in the United States: a review of the literature and its sociopolitical context. *Annu*  
19 *Rev Public Health* 2005;26:367-97.  
20  
21  
22 26. Abbate A, Arena R, Abouzaki N, et al. Heart failure with preserved ejection fraction:  
23 refocusing on diastole. *Int J Cardiol* 2015;179:430-40.  
24  
25  
26 27. Shah AM, Claggett B, Sweitzer NK, et al. Cardiac structure and function and prognosis  
27 in heart failure with preserved ejection fraction: findings from the echocardiographic study of the  
28 Treatment of Preserved Cardiac Function Heart Failure with an Aldosterone Antagonist  
29 (TOPCAT) Trial. *Circ Heart Fail* 2014;7:740-51.  
30  
31  
32 28. Zile MR, Gottdiener JS, Hetzel SJ, et al. Prevalence and significance of alterations in  
33 cardiac structure and function in patients with heart failure and a preserved ejection fraction.  
34 *Circulation* 2011;124:2491-501.  
35  
36  
37 29. Burke MA, Katz DH, Beussink L, et al. Prognostic importance of pathophysiologic  
38 markers in patients with heart failure and preserved ejection fraction. *Circ Heart Fail* 2014;7:288-  
39 99.  
40  
41  
42 30. Zabalgoitia M, Ur Rahman SN, Haley WE, et al. Impact of ethnicity on left ventricular  
43 mass and relative wall thickness in essential hypertension. *Am J Cardiol* 1998;81:412-7.  
44  
45  
46 31. Rodriguez CJ, Diez-Roux AV, Moran A, et al. Left ventricular mass and ventricular  
47 remodeling among Hispanic subgroups compared with non-Hispanic blacks and whites: MESA  
48 (Multi-ethnic Study of Atherosclerosis). *J Am Coll Cardiol* 2010;55:234-42.  
49  
50  
51 32. Effeo VS, Chen H, Moran A, et al. Acculturation is associated with left ventricular mass  
52 in a multiethnic sample: the Multi-Ethnic Study of Atherosclerosis. *BMC Cardiovasc Disord*  
53 2015;15:161.  
54  
55  
56  
57  
58  
59  
60

- 1  
2  
3 33. Rodriguez CJ, Lin F, Sacco RL, et al. Prognostic implications of left ventricular mass  
4 among Hispanics: the Northern Manhattan Study. *Hypertension* 2006;48:87-92.  
5  
6 34. Julius S, Li Y, Brant D, Krause L, Buda AJ. Neurogenic pressor episodes fail to cause  
7 hypertension, but do induce cardiac hypertrophy. *Hypertension* 1989;13:422-9.  
8  
9 35. Rozanski A, Blumenthal JA, Davidson KW, Saab PG, Kubzansky L. The epidemiology,  
10 pathophysiology, and management of psychosocial risk factors in cardiac practice: the emerging  
11 field of behavioral cardiology. *J Am Coll Cardiol* 2005;45:637-51.  
12  
13 36. Rodriguez CJ, Elkind MS, Clemow L, et al. Association between social isolation and left  
14 ventricular mass. *Am J Med* 2011;124:164-70.  
15  
16 37. Gallo LC, Penedo FJ, Espinosa de los Monteros K, Arguelles W. Resiliency in the face of  
17 disadvantage: do Hispanic cultural characteristics protect health outcomes? *J Pers* 2009;77:1707-  
18 46.  
19  
20 38. Gallo LC, de Los Monteros KE, Allison M, et al. Do socioeconomic gradients in  
21 subclinical atherosclerosis vary according to acculturation level? Analyses of Mexican-  
22 Americans in the multi-ethnic study of atherosclerosis. *Psychosom Med* 2009;71:756-62.  
23  
24 39. Davila YR, Reifsnider E, Pecina I. Familismo: influence on Hispanic health behaviors.  
25 *Appl Nurs Res* 2011;24:e67-72.  
26  
27 40. Sabogal F, Marin G, Otero-Sabogal R, Marin B. Hispanic familism and acculturation:  
28 What changes and what doesn't? *Hispanic Journal of Behavioral Sciences* 1987;9:397-412.  
29  
30 41. Miranda A, Estrada D, Firpo-Jimenez M. Differences in family cohesion, adaptability,  
31 and environment among Latino families in dissimilar stages of acculturation. *The Family Journal*  
32 2000;8:341-50.  
33  
34 42. Rodriguez N, Mira C, Paez N, Myers H. Exploring the complexities of familism and  
35 acculturation: central constructs for people of Mexican origin. *Am J Community Psychol*  
36 2007;39:61-77.  
37  
38  
39  
40  
41  
42  
43  
44  
45  
46

47 Table 1. ECHO-SOL Demographic and Clinical Characteristics  
48

| Demographic Characteristics     | Participants (N = 1,818) <sup>†</sup> |
|---------------------------------|---------------------------------------|
| Women                           | 1187 (57.4)                           |
| Age, mean (SE)                  | 56.4 (0.37)                           |
| High School Graduate or Higher  | 726 (43.3)                            |
| Annual Family Income > \$20,000 | 787 (45.5)                            |
| Marital Status                  |                                       |

|                                                            |              |
|------------------------------------------------------------|--------------|
| Single                                                     | 332 (18.8)   |
| Married/Partner                                            | 961 (53.2)   |
| Separated/Divorced/Widow                                   | 522 (28.0)   |
| Insured                                                    | 1042 (60.1)  |
| Short Acculturation Scale for Hispanics (SASH) [mean (SE)] |              |
| Language Use Subscale                                      | 1.7 (0.05)   |
| Social Relations Subscale                                  | 2.1 (0.03)   |
| Length of US residence [N (%)]                             |              |
| <5 years                                                   | 178 (13.6)   |
| 5-10 years                                                 | 247 (15.2)   |
| 11-20                                                      | 385 (22.1)   |
| >20                                                        | 842 (49.1)   |
| Second generation or higher                                | 185 (9.3)    |
| English language preference                                | 225 (14.0)   |
| Age at migration [mean (SE)]                               | 34.0 (1.0)   |
| US born                                                    | 163 (7.9)    |
| Clinical Characteristics [N (%)]                           |              |
| Hypertension                                               | 861 (50.0)   |
| Type 2 Diabetes                                            | 523 (28.4)   |
| Current Smoker                                             | 304 (17.6)   |
| Physical activity level low                                | 1227 (67.3)  |
| BMI $\geq$ 30                                              | 822 (44.3)   |
| Current Alcohol Use                                        | 770 (43.5)   |
| Echocardiographic Variables [mean (SE)]                    |              |
| Left Atrial Volume Index                                   | 23.0 (0.25)  |
| Relative Wall Thickness                                    | 0.40 (0.004) |
| Left Ventricular Mass Index                                | 82.7 (0.7)   |
| Ejection Fraction                                          | 59.8 (0.2)   |
| E prime (e')                                               | 8.1 (0.09)   |
| E/e'                                                       | 10.0 (0.12)  |
| Diastolic Dysfunction [N (%)]                              | 916 (51.9)   |

†N's presented are unweighted counts of total participants in the ECHO-SOL with each respective characteristic. Percentages are weighted row percentages.

Table 2. Adjusted Analyses of Acculturation Measures with Cardiac Structure and Function.\*

|                                           | LVMI (g/m <sup>2</sup> )<br>β (p) | RWT<br>β (p)              | LAVI (mL/m <sup>2</sup> )<br>β (p) | LVEF (%)<br>β (p) | e' (cm/s)<br>β (p) | E/e'<br>β (p) |
|-------------------------------------------|-----------------------------------|---------------------------|------------------------------------|-------------------|--------------------|---------------|
| <b>Nativity</b>                           |                                   |                           |                                    |                   |                    |               |
| Age, sex                                  | —                                 | —                         | —                                  | —                 | -0.349 (0.12)      | 0.571 (0.02)  |
| Model 1                                   | —                                 | —                         | —                                  | —                 | -0.320 (0.10)      | 0.524 (0.02)  |
| Model 2                                   | —                                 | —                         | —                                  | —                 | -0.324 (0.14)      | 0.532 (0.02)  |
| Model 3                                   | —                                 | —                         | —                                  | —                 | -0.303 (0.12)      | 0.503 (0.02)  |
| <b>Foreign Born<br/>(Years in the US)</b> |                                   |                           |                                    |                   |                    |               |
| Age, sex                                  | —                                 | 0.020 (0.06); all (0.03)  | -1.74 (0.01); all (0.04)           | —                 | —                  | —             |
| Model 1                                   | —                                 | 0.022 (0.02); all (0.02)  | -1.74 (0.01); all (0.05)           | —                 | —                  | —             |
| Model 2                                   | —                                 | 0.018 (0.06); all (0.02)  | -1.70 (0.009); all (0.05)          | —                 | —                  | —             |
| Model 3                                   | —                                 | 0.021 (0.02); all (0.007) | -1.71 (0.008); all (0.05)          | —                 | —                  | —             |
| <b>Generation</b>                         |                                   |                           |                                    |                   |                    |               |
| Age, sex                                  | —                                 | —                         | -0.468 (0.21)                      | —                 | -0.529 (0.01)      | 0.710 (0.002) |
| Model 1                                   | —                                 | —                         | -1.797 (0.004)                     | —                 | -0.447 (0.01)      | 0.594 (0.003) |
| Model 2                                   | —                                 | —                         | -1.444 (0.03)                      | —                 | -0.499 (0.01)      | 0.671 (0.003) |
| Model 3                                   | —                                 | —                         | -1.584 (0.01)                      | —                 | -0.425 (0.02)      | 0.575 (0.006) |
| <b>SASH Language</b>                      |                                   |                           |                                    |                   |                    |               |
| Age, sex                                  | —                                 | —                         | 0.580 (0.01)                       | —                 | 0.125 (0.10)       | —             |
| Model 1                                   | —                                 | —                         | 0.610 (0.008)                      | —                 | 0.097 (0.11)       | —             |
| Model 2                                   | —                                 | —                         | 0.546 (0.01)                       | —                 | 0.123 (0.15)       | —             |
| Model 3                                   | —                                 | —                         | 0.590 (0.007)                      | —                 | 0.095 (0.16)       | —             |
| <b>Age at Immigration</b>                 |                                   |                           |                                    |                   |                    |               |
| Age, sex                                  | —                                 | 0.0005 (0.15)             | -0.040 (0.008)                     | —                 | -0.005 (0.27)      | —             |
| Model 1                                   | —                                 | 0.0005 (0.13)             | -0.040 (0.008)                     | —                 | -0.006 (0.14)      | —             |
| Model 2                                   | —                                 | 0.0004 (0.15)             | -0.038 (<0.001)                    | —                 | -0.005 (0.37)      | —             |
| Model 3                                   | —                                 | 0.0004 (0.13)             | -0.038 (0.01)                      | —                 | -0.005 (0.22)      | —             |

\*Only acculturation measures that were significant in unadjusted analyses were analyzed in multivariable adjusted models.  
 For Years in the US, 1<sup>st</sup> p value reflects <5 years vs. >20 years comparison. 2<sup>nd</sup> p value is p value overall for all Years in the US categories  
 Model 1: Age, Sex, Diabetes, Hypertension, Obesity | Model 2: Age, Sex, Physical Activity, Tobacco, Alcohol Use | Model 3: Model 1 + Model 2  
 LVMI = Left ventricular mass index; RWT = Relative wall thickness; LAVI = Left atrial volume index; LVEF = Left ventricular ejection fraction  
 e' = Mitral annular early diastolic velocity; E/e' = Ratio between early mitral inflow velocity and mitral annular early diastolic velocity

Table 3. Unadjusted and Adjusted<sup>‡</sup> Analyses of Acculturation Measures with Diastolic Dysfunction.

|                            |                   | Adjusted Sequential Models |                   |                  |                   |
|----------------------------|-------------------|----------------------------|-------------------|------------------|-------------------|
|                            | Unadjusted        | Age, Sex                   | Model 1           | Model 2          | Model 3           |
| <b>Nativity</b>            |                   |                            |                   |                  |                   |
| Foreign born               | 1.67 (1.08-2.58)  | 0.98 (0.62-1.55)           | 0.94 (0.59-1.51)  | 0.98 (0.62-1.55) | 0.95 (0.59-1.53)  |
| US born                    | Ref               |                            |                   |                  |                   |
| <b>Years in the US</b>     |                   |                            |                   |                  |                   |
| <5                         | 0.86 (0.60-1.24)  | —                          | —                 | —                | —                 |
| 5-10                       | 0.72 (0.49-1.04)  |                            |                   |                  |                   |
| 11-20                      | 0.91 (0.61-1.37)  |                            |                   |                  |                   |
| >20                        | Ref               |                            |                   |                  |                   |
| <b>Generation</b>          |                   |                            |                   |                  |                   |
| 1                          | 1.90 (1.24-2.92)  | 1.29 (0.77-2.14)           | 1.18 (0.74-1.91)  | 1.26(0.77-2.06)  | 1.18 (0.73-1.89)  |
| 2                          | Ref               |                            |                   |                  |                   |
| <b>Language Preference</b> |                   |                            |                   |                  |                   |
| English                    | 0.67 (0.34-1.32)  | —                          | —                 | —                | —                 |
| Spanish                    | Ref               |                            |                   |                  |                   |
| <b>SASH Language</b>       | 0.81 (0.67-0.98)  | —                          | —                 | —                | —                 |
| <b>SASH Social</b>         | 0.88 (0.68-1.15)  | —                          | —                 | —                | —                 |
| <b>Age at Immigration</b>  | 1.02 (1.004-1.03) | 1.00 (0.99-1.02)           | 1.01 (0.995-1.02) | 1.01 (0.99-1.02) | 1.01 (0.995-1.02) |

<sup>‡</sup>Only acculturation measures that were significant in unadjusted analyses were analyzed in adjusted models.

ORs (95% CIs) are presented

Model 1: Age, Sex, Diabetes, Hypertension, Obesity

Model 2: Age, Sex, Physical Activity, Tobacco, Alcohol Use

Model 3: Model 1 + Model 2



Table S1. Unadjusted Acculturation Measures with Echocardiographic Measures of Cardiac Structure and Function.

|                             | LVMI (g/m <sup>2</sup> ) |      | RWT                |      | LAVI (mL/m <sup>2</sup> ) |      | LVEF (%)          |      | e' (cm/s)         |        | E/e'              |        |
|-----------------------------|--------------------------|------|--------------------|------|---------------------------|------|-------------------|------|-------------------|--------|-------------------|--------|
| <b>Categorical Measures</b> |                          |      |                    |      |                           |      |                   |      |                   |        |                   |        |
|                             | Mean                     | p    | Mean               | p    | Mean                      | p    | Mean              | p    | Mean              | p      | Mean              | p      |
| Nativity                    |                          |      |                    |      |                           |      |                   |      |                   |        |                   |        |
| Foreign Born                | 82.74                    | 0.92 | 0.40               | 0.07 | 22.93                     | 0.10 | 59.83             | 0.54 | 7.98              | <0.001 | 10.1              | <0.001 |
| US Born                     | 82.54                    |      | 0.38               |      | 24.10                     |      | 59.50             |      | 8.99              |        | 8.8               |        |
| Years in US                 |                          |      |                    |      |                           |      |                   |      |                   |        |                   |        |
| <5 yrs                      | 79.80                    | 0.16 | 0.41               | 0.03 | 21.70                     | 0.03 | 59.94             | 0.09 | 7.71              | 0.11   | 10.2              | 0.25   |
| 5-10 yrs                    | 80.43                    |      | 0.39               |      | 22.40                     |      | 60.04             |      | 8.18              |        | 9.7               |        |
| 11-20 yrs                   | 83.60                    |      | 0.41               |      | 22.82                     |      | 58.94             |      | 8.27              |        | 9.8               |        |
| >20 yrs                     | 83.96                    |      | 0.39               |      | 23.50                     |      | 60.14             |      | 7.86              |        | 10.2              |        |
| Generation                  |                          |      |                    |      |                           |      |                   |      |                   |        |                   |        |
| First                       | 82.69                    | 0.88 | 0.40               | 0.08 | 22.89                     | 0.02 | 59.84             | 0.45 | 7.97              | <0.001 | 10.1              | <0.001 |
| Second or Greater           | 82.96                    |      | 0.38               |      | 24.41                     |      | 59.45             |      | 9.01              |        | 8.8               |        |
| Language                    |                          |      |                    |      |                           |      |                   |      |                   |        |                   |        |
| English                     | 81.51                    | 0.59 | 0.38               | 0.08 | 24.00                     | 0.06 | 60.13             | 0.48 | 8.52              | 0.15   | 9.7               | 0.64   |
| Spanish                     | 82.92                    |      | 0.40               |      | 22.87                     |      | 59.75             |      | 7.99              |        | 10.0              |        |
| <b>Continuous Measures</b>  |                          |      |                    |      |                           |      |                   |      |                   |        |                   |        |
|                             | β (se)                   | p    | β (se)             | p    | β (se)                    | p    | β (se)            | p    | β (se)            | p      | β (se)            | p      |
| Age at Immigration          | -0.0003<br>(0.0632)      | 0.99 | 0.0006<br>(0.0003) | 0.02 | -0.030<br>(0.014)         | 0.03 | -0.003<br>(0.012) | 0.79 | -0.023<br>(0.007) | 0.001  | 0.012<br>(0.010)  | 0.23   |
| SASH Subscales              |                          |      |                    |      |                           |      |                   |      |                   |        |                   |        |
| Language                    | 0.087<br>(0.735)         | 0.91 | -0.005<br>(0.003)  | 0.10 | 0.539<br>(0.237)          | 0.02 | 0.166<br>(0.180)  | 0.36 | 0.255<br>(0.098)  | 0.009  | -0.205<br>(0.109) | 0.06   |
| Social Relations            | 0.086<br>(1.392)         | 0.95 | -0.009<br>(0.006)  | 0.15 | 0.732<br>(0.373)          | 0.05 | 0.539<br>(0.295)  | 0.07 | 0.266<br>(0.155)  | 0.09   | -0.156<br>(0.217) | 0.47   |

LVMI = Left ventricular mass index; RWT = Relative wall thickness; LAVI = Left atrial volume index

LVEF = Left ventricular ejection fraction; e' = Mitral annular early diastolic velocity

E/e' = Ratio between early mitral inflow velocity and mitral annular early diastolic velocity

Table S2. Income Stratified Adjusted Analyses of Acculturation Measures with Cardiac Structure and Function.<sup>‡</sup>

|                            | LVMI (g/m <sup>2</sup> ) |      |           |       | LAVI (mL/m <sup>2</sup> ) |      |           |      | e' (cm/s) |        |           |       | E/e'      |       |           |       | Diastolic Dysfunction |                  |
|----------------------------|--------------------------|------|-----------|-------|---------------------------|------|-----------|------|-----------|--------|-----------|-------|-----------|-------|-----------|-------|-----------------------|------------------|
|                            | <\$20,000                |      | >\$20,000 |       | <\$20,000                 |      | >\$20,000 |      | <\$20,000 |        | >\$20,000 |       | <\$20,000 |       | >\$20,000 |       | <\$20,000             | >\$20,000        |
|                            | Mean                     | p    | Mean      | p     | Mean                      | p    | Mean      | p    | Mean      | p      | Mean      | p     | Mean      | p     | Mean      | p     | ORs (95% CI)          | ORs (95% CI)     |
| <b>Nativity</b>            |                          |      |           |       |                           |      |           |      |           |        |           |       |           |       |           |       |                       |                  |
| Foreign                    | —                        | —    | —         | —     | —                         | —    | —         | —    | 7.90      | 0.0006 | 8.24      | 0.048 | —         | —     | —         | —     | 1.67 (0.89-3.14)      | 1.24 (0.70-2.19) |
| US born                    |                          |      |           |       |                           |      |           |      | 8.83      |        | 8.99      |       |           |       |           |       |                       |                  |
| <b>Years in the US</b>     |                          |      |           |       |                           |      |           |      |           |        |           |       |           |       |           |       |                       |                  |
| <5                         | 80.02                    |      | 73.35     |       |                           |      |           |      | 7.70      |        | 9.03      |       | 10.20     |       | 9.17      |       |                       |                  |
| 5-10                       | 81.32                    | 0.15 | 79.38     | 0.002 | —                         | —    | —         | —    | 7.72      | 0.27   | 8.87      | 0.001 | 10.36     | 0.62  | 8.63      | 0.003 | —                     | —                |
| 11-20                      | 82.22                    |      | 86.12     |       |                           |      |           |      | 8.23      |        | 8.56      |       | 9.912     |       | 9.49      |       |                       |                  |
| >20                        | 85.73                    |      | 82.23     |       |                           |      |           |      | 7.87      |        | 7.89      |       | 10.28     |       | 10.16     |       |                       |                  |
| <b>Generation</b>          |                          |      |           |       |                           |      |           |      |           |        |           |       |           |       |           |       |                       |                  |
| 1                          | —                        | —    | —         | —     | 23.04                     | 0.45 | 22.85     | 0.02 | —         | —      | —         | —     | —         | —     | —         | —     | 1.82 (0.99-3.34)      | 1.50 (0.83-2.69) |
| 2                          |                          |      |           |       | 23.91                     |      | 24.67     |      |           |        |           |       |           |       |           |       |                       |                  |
| <b>Language Preference</b> |                          |      |           |       |                           |      |           |      |           |        |           |       |           |       |           |       |                       |                  |
| English                    | —                        | —    | —         | —     | —                         | —    | —         | —    | —         | —      | —         | —     | 9.42      | 0.01  | 10.00     | 0.63  | —                     | —                |
| Spanish                    |                          |      |           |       |                           |      |           |      |           |        |           |       | 10.21     |       | 9.55      |       |                       |                  |
|                            | β                        | p    | β         | p     | β                         | p    | β         | p    | β         | p      | β         | p     | β         | p     | β         | p     | —                     | —                |
| <b>SASH Language</b>       | —                        | —    | —         | —     | 0.2686                    | 0.32 | 0.7213    | 0.04 | —         | —      | —         | —     | -0.3026   | 0.003 | 0.1065    | 0.60  | —                     | —                |
| <b>SASH Social</b>         | —                        | —    | —         | —     | —                         | —    | —         | —    | —         | —      | —         | —     | -0.5410   | 0.008 | 0.4641    | 0.27  | —                     | —                |

<sup>‡</sup>Only statistically significant interactions were analyzed in adjusted models; excludes cases where income is missing.  
 Multivariable models were adjusted for Age, Sex, Diabetes, Hypertension, Obesity, Physical Activity, Tobacco, and Alcohol Use.  
 LVMI = Left ventricular mass index; LAVI = Left atrial volume index  
 e' = Mitral annular early diastolic velocity; E/e' = Ratio between early mitral inflow velocity and mitral annular early diastolic velocity

1  
2  
3 Figure Legend: Proposed Relationship Between Acculturation with Abnormal Cardiac Structure and Function.  
4  
5  
6  
7  
8  
9  
10  
11  
12  
13  
14  
15  
16  
17  
18  
19  
20  
21  
22  
23  
24  
25  
26  
27  
28  
29  
30  
31  
32  
33  
34  
35  
36  
37  
38  
39  
40  
41  
42  
43  
44  
45  
46  
47

For peer review only

1  
2  
3  
4  
5  
6  
7  
8  
9  
10  
11  
12  
13  
14  
15  
16  
17  
18  
19  
20  
21  
22  
23  
24  
25  
26  
27  
28  
29  
30  
31  
32  
33  
34  
35  
36  
37  
38  
39  
40  
41  
42  
43  
44  
45  
46  
47  
48  
49  
50  
51  
52  
53  
54  
55  
56  
57  
58  
59  
60

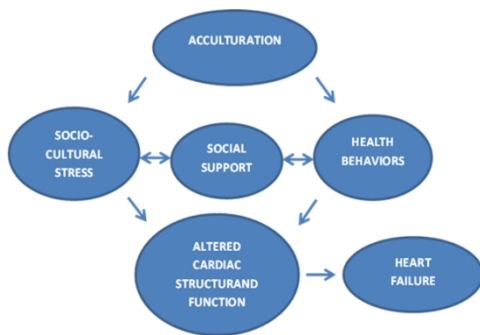

338x190mm (96 x 96 DPI)

# BMJ Open

## Association of Acculturation with Cardiac Structure and Function among Hispanic/Latinos: a cross-sectional analysis of the Echocardiographic Study of Latinos

|                                 |                                                                                                                                                                                                                                                                                                                                                                                                                                                                                                                                                                                                                                                                                                                                                                                                                                                                                   |
|---------------------------------|-----------------------------------------------------------------------------------------------------------------------------------------------------------------------------------------------------------------------------------------------------------------------------------------------------------------------------------------------------------------------------------------------------------------------------------------------------------------------------------------------------------------------------------------------------------------------------------------------------------------------------------------------------------------------------------------------------------------------------------------------------------------------------------------------------------------------------------------------------------------------------------|
| Journal:                        | <i>BMJ Open</i>                                                                                                                                                                                                                                                                                                                                                                                                                                                                                                                                                                                                                                                                                                                                                                                                                                                                   |
| Manuscript ID                   | bmjopen-2018-028729.R1                                                                                                                                                                                                                                                                                                                                                                                                                                                                                                                                                                                                                                                                                                                                                                                                                                                            |
| Article Type:                   | Original research                                                                                                                                                                                                                                                                                                                                                                                                                                                                                                                                                                                                                                                                                                                                                                                                                                                                 |
| Date Submitted by the Author:   | 22-Jul-2019                                                                                                                                                                                                                                                                                                                                                                                                                                                                                                                                                                                                                                                                                                                                                                                                                                                                       |
| Complete List of Authors:       | Lopez, Lenny; San Francisco VA Medical Center, Hospital Medicine<br>Swett, Katrina; Yeshiva University Albert Einstein College of Medicine, Medicine / Cardiology<br>Rodriguez, Fatima ; Stanford University School of Medicine, Medicine / Cardiology<br>Kizer, Jorge R.; San Francisco VA Medical Center, Medicine / Cardiology<br>Penedo, Frank; Northwestern University, Medical Social Sciences.<br>Gallo, Linda; San Diego State University<br>Allison, Matthew; University of California San Diego, Medicine<br>Arguelles, William; Baptist Health South Florida<br>Gonzalez, Franklyn; University of North Carolina at Chapel Hill, Biostatistics<br>Kaplan, Robert C.; Yeshiva University Albert Einstein College of Medicine, Epidemiology and Population Health<br>Rodriguez, Carlos J.; Yeshiva University Albert Einstein College of Medicine, Medicine / Cardiology |
| <b>Primary Subject Heading</b>: | Epidemiology                                                                                                                                                                                                                                                                                                                                                                                                                                                                                                                                                                                                                                                                                                                                                                                                                                                                      |
| Secondary Subject Heading:      | Cardiovascular medicine                                                                                                                                                                                                                                                                                                                                                                                                                                                                                                                                                                                                                                                                                                                                                                                                                                                           |
| Keywords:                       | Heart failure < CARDIOLOGY, SOCIAL MEDICINE, EPIDEMIOLOGY, Echocardiography < CARDIOLOGY                                                                                                                                                                                                                                                                                                                                                                                                                                                                                                                                                                                                                                                                                                                                                                                          |
|                                 |                                                                                                                                                                                                                                                                                                                                                                                                                                                                                                                                                                                                                                                                                                                                                                                                                                                                                   |

SCHOLARONE™  
Manuscripts

1  
2  
3 **Association of Acculturation with Cardiac Structure and Function among**  
4 **Hispanic/Latinos: a cross-sectional analysis of the Echocardiographic Study of Latinos**  
5  
6  
7

8 **Short Title:** Acculturation and Cardiac Structure and Function  
9

10  
11 **Address for correspondence**

12 Lenny López, MD, MPH, MDiv. Division of Hospital Medicine, University of California San  
13 Francisco – San Francisco VA Medical Center. 4150 Clement St, San Francisco CA, 94121.  
14 (lenny.lopez@ucsf.edu). Phone: 617-270-6600.  
15  
16

17 **Contributing authors:**

- 18 1. Lenny López, MD, MPH, MDiv. Division of Hospital Medicine, University of California  
19 San Francisco – San Francisco VA Medical Center, San Francisco, CA.  
20 (lenny.lopez@ucsf.edu).
- 21 2. Katrina Swett, MS. Department of Epidemiology & Population Health, Albert Einstein  
22 College of Medicine, Bronx, NY. (katrina.swett@einstein.yu.edu).
- 23 3. Fátima Rodríguez, MD, MPH. Division of Cardiovascular Medicine, Stanford University,  
24 Palo Alto, CA. (frodriagu@stanford.edu).
- 25 4. Jorge R. Kizer, MD. Division of Cardiology, San Francisco VA Medical Center, San  
26 Francisco, CA. (jorge.kizer@ucsf.edu).
- 27 5. Frank J. Penedo, PhD. Department of Medical Social Sciences, Feinberg School of  
28 Medicine, Northwestern University, Chicago, Illinois. (frank.penedo@northwestern.edu).
- 29 6. Linda C. Gallo, PhD. Department of Psychology, San Diego State University, San Diego,  
30 CA. (lgallo@mail.sdsu.edu).
- 31 7. Matthew A. Allison, MD, MPH, FAHA. Division of Preventive Medicine, University of  
32 California San Diego, San Diego, CA. (mallison@ucsd.edu).
- 33 8. William Arguelles, PhD. Center for Research and Grants, Baptist Health South Florida,  
34 Miami, FL. (warguelles@psy.miami.edu).
- 35 9. Franklyn Gonzalez, MS. Department of Biostatistics, University of North Carolina,  
36 Chapel Hill, NC. (fgonzale@email.unc.edu).
- 37 10. Robert Kaplan, PhD. Department of Epidemiology & Population Health, Albert Einstein  
38 College of Medicine, Bronx, NY. (robert.kaplan@einstein.yu.edu).
- 39 11. Carlos J. Rodríguez, MD, MPH. Departments of Cardiovascular Medicine, Epidemiology  
40 and Population Health, Albert Einstein College of Medicine, Bronx, NY.  
41 (carlos.rodriguez@einstein.yu.edu).
- 42  
43  
44  
45  
46  
47  
48

49 Manuscript Word Count: 3,425

50 Number of Tables: 3

51 Number of Figures: 2

52 Number of Supplemental Tables: 2  
53  
54  
55  
56  
57

## Abstract

**Objective:** Hispanics/Latinos, the largest immigrant population in the United States, undergo the process of acculturation and have a large burden of heart failure risk. Few studies have examined the association of acculturation on cardiac structure and function.

**Design:** cross-sectional

**Setting:** the Echocardiographic Study of Latinos

**Participants:** 1,818 Hispanic adult participants with baseline echocardiographic assessment and acculturation measured by the Short Acculturation Scale, nativity, immigration age, length of US residence, generational status and language.

**Primary and secondary outcome measures:** Echocardiographic assessment of left atrial volume index (LAVI), left ventricular mass index (LVMI), early diastolic transmitral inflow and mitral annular velocities.

**Results:** The study population was predominantly Spanish-speaking and foreign-born with mean US residence of 22.7 years, mean age of 56.4 years; 50% had hypertension, 28% had diabetes, and 44% had a BMI >30kg/m<sup>2</sup>. Multivariable analyses demonstrated higher LAVI with increasing years of US residence. Foreign-born and first generation participants had higher E/e' but lower LAVI and e' velocities compared to the second generation. Higher acculturation and income >\$20K were associated with higher LVMI, LAVI, and E/e', but lower e' velocities. Preferential Spanish-speakers with an income <\$20K had a higher E/e'.

**Conclusions:** Acculturation was associated with abnormal cardiac structure and function, with some effect modification seen according to socioeconomic status.

**Abstract Word Count:** 207

**Keywords:** Acculturation, Echocardiogram, Hispanics/Latinos, Socioeconomic Status

### Strengths and limitations of this study

- A population-based cohort study among predominantly immigrant Hispanic/Latinos in the United States.
- A detailed comprehensive echocardiographic examination was performed to determine cardiac structure and function in every participant.
- Determined whether acculturation, an important sociocultural factor, contributes to the heart failure risk factor burden among an immigrant population.
- We are specifically referring to acculturation into the US culture, which may not be generalizable to acculturation in other settings.



1  
2  
3 Cardiovascular disease (CVD) and heart failure (HF) risk factor burden is high among  
4  
5 Hispanic/Latinos in the United States (US)<sup>1,2</sup> compared to non-Hispanic whites leading to  
6  
7 abnormalities of cardiac structure and function<sup>3</sup> which have been associated with incident  
8  
9 clinical HF,<sup>4</sup> incident CVD and increased mortality.<sup>5-8</sup>

10  
11  
12  
13  
14 With respect to HF, Hispanics/Latinos have a higher incidence compared to non-Hispanic whites  
15  
16 and Hispanics/Latinos who present with HF are younger with more co-morbidities and a lower  
17  
18 left ventricular (LV) ejection fraction (EF) compared to non-Hispanic whites.<sup>2,9-11</sup> Beyond  
19  
20 traditional HF risk factors (hypertension, diabetes and obesity), sociocultural factors such as  
21  
22 acculturation, may contribute to HF risk among Hispanic/Latinos (**Figure 1/Conceptual**  
23  
24 **Model**)<sup>2</sup> but the impact of acculturation on cardiac structure and function has not been examined.  
25  
26 The fact that Hispanics/Latinos are the largest immigrant population in the US accentuates the  
27  
28 public health impact of studying the impact of acculturation on cardiac parameters.  
29  
30  
31  
32  
33  
34

35  
36 Acculturation is a multidimensional process whereby immigrants adapt to the beliefs and  
37  
38 practices of a host culture.<sup>12</sup> This can pose a chronic daily stressor for many immigrants that can  
39  
40 affect physical health outcomes. Acculturation has been associated with increased psychosocial  
41  
42 stress, deleterious CV health behaviors and a higher CV risk factor burden.<sup>13-16</sup> In our  
43  
44 mechanistic framework, the acculturative process leads to increase stressors and worse health  
45  
46 behaviors which separately or jointly alter cardiac structure and function to increase HF risk.  
47  
48 Few studies<sup>17,18</sup> have examined acculturation in relation to HF risk specifically focusing on  
49  
50 cardiac structure and function as key intermediary outcomes.  
51  
52  
53  
54  
55  
56  
57  
58  
59  
60

1  
2  
3 We primarily sought to test whether acculturation, an important sociocultural variable with  
4 biopsychosocial implications, is associated with cardiac structure and function among  
5 Hispanics/Latinos. Studies of acculturation and CVD often overlook socioeconomic status (SES)  
6 as an effect modifier. Because SES is associated with cardiac parameters<sup>19</sup> and modifies the  
7 association between acculturation and other health-related variables,<sup>20</sup> secondarily, we sought to  
8 test whether our primary associations are moderated by SES.  
9  
10  
11  
12  
13  
14  
15  
16  
17  
18

## 19 **Methods**

### 20 **Cohort Description**

21  
22 The Hispanic Community Health Study/Study of Latinos (HCHS/SOL) is a population-based  
23 study of 16,415 Hispanic/Latinos from randomly selected households at four US field centers  
24 (Bronx, NY; Chicago, IL; Miami, FL; and San Diego, CA).<sup>21</sup> Probability sampling was used to  
25 ensure broad representation of the target population and to minimize the sources of bias that may  
26 otherwise enter into the cohort selection and recruitment process. Participants were between 18  
27 and 74 years of age, and self-identified as Cuban, Central American, Dominican, Mexican,  
28 Puerto Rican, or South American Hispanic/Latino heritage. The ECHO-SOL ancillary study was  
29 designed to provide echocardiographic parameters characterizing cardiac structure and function  
30 in a representative HCHS/SOL baseline subsample of 1,818 participants  $\geq 45$  years old.<sup>3,22</sup>  
31  
32 Institutional Review Board approval was obtained at each study site and all ECHO-SOL  
33 participants gave informed consent prior to participating in the study.  
34  
35  
36  
37  
38  
39  
40  
41  
42  
43  
44  
45  
46  
47  
48  
49  
50

### 51 **Patient and public involvement**

1  
2  
3 No patients were involved in the development of the research question, design, recruitment or  
4 implementation of this research cohort study. Results were disseminated to study participants in  
5 the form of a Data Book and periodic newsletters. See [www.saludsol.net](http://www.saludsol.net).  
6  
7  
8  
9

### 10 11 12 **In-Person Examination** 13

14 The examination protocol for the parent HCHS/SOL has been previously published.<sup>13</sup> Obesity  
15 was defined as a body mass index (BMI)  $\geq 30.0$  kg/m<sup>2</sup>. Seated resting blood pressures were  
16 measured in triplicate and the average of the 2<sup>nd</sup> and 3<sup>rd</sup> readings was used for analysis. Type 2  
17 diabetes was defined based on American Diabetes Association definition using one or more of  
18 the following criteria: 1) fasting serum glucose  $\geq 126$  mg/dl, 2) oral glucose tolerance test  $\geq 200$   
19 mg/dl, 3) self-reported diabetes, 4) HbA1C  $\geq 6.5\%$ , or 5) taking anti-diabetic medication or  
20 insulin. Renal function was measured by estimated glomerular filtration rate (eGFR). Physical  
21 activity levels, categorized as low or medium/high, were assessed using the Global Physical  
22 Activity Questionnaire.<sup>23</sup> Self-report questionnaires assessed smoking status (no/ever/current),  
23 alcohol consumption (current/no), and insurance coverage (yes/no) and type  
24 (Private/Medicare/Medicaid). Socioeconomic status was defined as highest degree or level of  
25 school completed and household income level – dichotomized as  $< \$20,000$  and  $> \$20,000$ , given  
26 the low number of participants with incomes  $> \$40,000$ . Our secondary analysis focused on  
27 current income while living in the US as more relevantly influencing a participant's acculturative  
28 process, acting as a proxy for the ability to integrate and be exposed to mainstream US cultural  
29 contexts. Marital status categorized as (single/married/partnered/separated/divorced/widowed).  
30  
31  
32  
33  
34  
35  
36  
37  
38  
39  
40  
41  
42  
43  
44  
45  
46  
47  
48  
49  
50  
51  
52  
53

### 54 **Echocardiographic Measurements** 55 56 57

1  
2  
3 Trained sonographers performed transthoracic echocardiography examinations, including 2D  
4 imaging, and spectral, color and tissue Doppler.<sup>22</sup> Echocardiographic measures of left and right  
5 heart structure and function included:  
6  
7

- 8  
9  
10 1) LV mass index (LVMI) was determined according to guidelines,<sup>24</sup> by subtracting the LV  
11 endocardial cavity volume from the LV epicardial volume and multiplying the resultant  
12 myocardial volume by the myocardial density and indexing to body surface area.  
13  
14
- 15 2) LV systolic function and volumes. LVEF was derived from Volumetric Assessments using  
16 the method of discs from apical 4- and 2-chamber long-axis views to measure end-diastolic  
17 volume (EDV) and end-systolic volume (ESV). LVEF was calculated:  $(EDV - ESV)/EDV$ .  
18  
19
- 20 3) LV diastolic function was defined per guidelines,<sup>25</sup> using three echocardiographic  
21 parameters: 1) peak early (E) and late (A) diastolic transmitral inflow velocities; 2) early  
22 diastolic ( $e'$ ) annular velocities (the average of septal and lateral annular velocities were  
23 used); 3) left atrial volume indexed (LAVI) to body surface area.  
24  
25
- 26 4) Relative Wall Thickness (RWT) defined as:  $[(\text{posterior wall thickness} \times 2) / \text{LV diastolic}$   
27 diameter] predicates LV geometry. Higher RWT values are associated with a smaller LV  
28 cavity size and lower RWT values are associated with higher LV cavity sizes.  
29  
30  
31  
32  
33  
34  
35  
36  
37  
38  
39  
40  
41

### 42 **Acculturation Measures**

43  
44 Acculturation was characterized according to several measured variables. First, nativity was  
45 classified as either born in or outside the US mainland (50 states). Those born in Puerto Rico  
46 (PR) or other US territories were classified as born outside of the US mainland to reflect their  
47 migration and acculturation experiences. Second, foreign-born individuals were asked the  
48 number of years lived in the US and categorized as <5, 5-10, 11-20, >20 years. We used the  
49  
50  
51  
52  
53  
54  
55  
56  
57  
58  
59  
60

1  
2  
3 Short Acculturation Scale for Hispanics (SASH),<sup>26</sup> which has two subscales based on five-point  
4 Likert type questions: 1. the SASH language subscale (items related to language use [e.g.,  
5 language they speak, think]); and 2. the SASH social relations subscale (items related to media  
6 preference and social affiliations [e.g., language of media programs watched; ethnicity of close  
7 friends]). The SASH has yielded reliabilities ( $\alpha$ ) of 0.92 (overall), 0.90 (language use), 0.86  
8 (media preference), and 0.78 (ethnic and social relations). These subscales were analyzed  
9 separately with higher scores representing higher degrees of acculturation. Fifth, language  
10 preference was further characterized as English vs. Spanish based on language of interview.  
11 Finally, data on generational status (first- and second-generation Hispanics are US-born and  
12 distinct from their foreign-born immigrant parents) was collected as well as age at the time of  
13 migration to the US.  
14  
15  
16  
17  
18  
19  
20  
21  
22  
23  
24  
25  
26  
27  
28  
29  
30

### 31 **Statistical Analyses**

32  
33 Sampling weights were used to obtain weighted frequencies of descriptive variables and  
34 population estimates in the ECHO-SOL target population. We used means  $\pm$  standard errors  
35 (SEs) for continuous variables and proportions for categorical variables. LVMI, RWT, LVEF, e'  
36 annular velocities and LAVI were analyzed as continuous variables. LV diastolic dysfunction  
37 (LVDD) was analyzed as a binary variable (present vs. absent).<sup>3</sup> Acculturation variables were  
38 categorical (foreign- vs. US-born; 1<sup>st</sup> generation vs. 2<sup>nd</sup>; Spanish language preference vs.  
39 English), ordinal (<5, 5-10, 11-20, and >20 years in the US) and continuous measures (age at  
40 immigration and SASH subscales). Weighted means and linear regression analysis was utilized  
41 for continuous variables whereas weighted frequencies and Rao-Scott Chi-Square was utilized  
42 for the categorical/ordinal variables. Means were compared across categorical acculturation  
43  
44  
45  
46  
47  
48  
49  
50  
51  
52  
53  
54  
55  
56  
57  
58  
59  
60

1  
2  
3 variables using ANOVA for each measure of cardiac structure (LVMI, RWT, LAVI) and  
4  
5 function (LVEF,  $e'$ ,  $E/e'$ ). Only significant unadjusted associations were further explored in  
6  
7 multivariable analysis. Unadjusted and multivariable linear and logistic regression analyses were  
8  
9 determined by our continuous and categorical dependent variable measures of cardiac structure  
10  
11 and function, respectively utilizing sequential modeling for age and sex followed by models  
12  
13 including clinical covariates (diabetes, hypertension, and obesity), and behavioral characteristics  
14  
15 (physical activity, tobacco use, and alcohol use). For years in the US, we compared >20 years to  
16  
17 <5 years as well as an overall comparison across each category of years in the US. We performed  
18  
19 a couple of exploratory analyses (data not shown): 1. comparing acculturative characteristics of  
20  
21 individuals born in the island of PR vs. other foreign-born Hispanics; 2. comparing acculturation  
22  
23 and health care utilization using HCHS/SOL questions regarding primarily regarding difficulty  
24  
25 obtaining health care in the past year and number of physician visits in the past year. We tested  
26  
27 effect moderation with income through the use of interaction terms in models followed by  
28  
29 stratified analyses by income for statistically significant interactions at the  $p < 0.01$  level. All  
30  
31 other statistical tests were 2-sided at a significance level of 0.05. All reported values were  
32  
33 weighted to account for HCHS/SOL sampling probability design, stratification, clustering and  
34  
35 nonresponse and to make estimates applicable to the HCHS/SOL target population. All analyses  
36  
37 were performed utilizing SAS 9.3 (SAS Institute, Cary, NC) survey statistics, which produce  
38  
39 standard errors (SEs) not standard deviations.  
40  
41  
42  
43  
44  
45  
46  
47  
48

## 49 **Results**

50  
51 Fifty-seven percent of the study population were women; almost half (46%) had a reported  
52  
53 annual income under \$20K; over half were married and most had some type of health insurance  
54  
55  
56  
57

1  
2  
3 (mostly Medicaid and/or Medicare). Hypertension and diabetes were prevalent in half and almost  
4 one-third of the study population respectively. Most of the study population was foreign-born,  
5  
6 only 14% preferred English, almost half (49%) had been in the US >20 years with a mean age of  
7  
8 migration of 34 years of age, signifying that the majority came to the US as adults (**Table 1**).  
9  
10 Mean values of echocardiographic variables (LAVI, RWT, LVMI, LVEF) were all within  
11  
12 normal limits for this study population. However, mean  $e'$  annular velocities and  $E/e'$  ratio were  
13  
14 borderline abnormal. Some degree of diastolic dysfunction was seen in over half (52%) of the  
15  
16 study population but this has been previously described.<sup>3</sup>  
17  
18  
19  
20  
21  
22  
23

24 **Table S1** shows unadjusted relationships between acculturation measures and echocardiographic  
25 characteristics. LAVI was positively associated with increasing years in the US whereas RWT  
26 appeared to have a U-shaped association. A statistically significantly lower annular relaxation  
27 velocity and higher  $E/e'$  ratio was seen among the foreign-born compared to US-born and among  
28 those 1<sup>st</sup> generation compared to 2<sup>nd</sup> generation. Higher acculturation as measured by increasing  
29 SASH language scale was associated with increasing LAVI. Younger age of migration to US  
30 was associated with higher RWT and increased LAVI.  
31  
32  
33  
34  
35  
36  
37  
38  
39  
40  
41

42 Adjusted analyses (**Table 2**) demonstrated statistically significantly greater RWT and higher  
43 LAVI with more years in the US. A statistically significantly higher  $E/e'$  ratio was seen among  
44 the foreign-born participants. Those 1<sup>st</sup> generation had lower LAVI, lower  $e'$  annular velocities  
45 and higher  $E/e'$  ratios compared to 2<sup>nd</sup> generation. Increasing SASH language scale was  
46 associated with higher LAVI whereas younger age of migration to US was associated with  
47 higher LAVI and RWT. These associations persisted in sequential models adjusted for clinical  
48  
49  
50  
51  
52  
53  
54  
55  
56  
57  
58  
59  
60

1  
2  
3 factors and behavioral factors both separately and together. Although greater odds of LVDD was  
4 seen in unadjusted associations with nativity, generational status, SASH language, and age of  
5 immigration (**Table 3**), these associations did not persist on adjusted analysis.  
6  
7  
8  
9

10  
11  
12 Significant interactions ( $p < 0.01$ ) were found between our main exposure (acculturation) and  
13 income on the effect of cardiac structure and function. Among those whose annual income is  
14  $> \$20K$ , a greater number of years in the US was associated with higher LVMI, lower  $e'$  annular  
15 velocities, and a higher  $E/e'$  ratio compared to those making  $< \$20K$  annually. Generational status  
16 was associated with increased LAVI only among those making  $> \$20K$  annually. However, being  
17 a preferential Spanish-speaker carried a statistically significant higher  $E/e'$  ratio only among  
18 those making  $< \$20K$  annually. (**Table S2**).  
19  
20  
21  
22  
23  
24  
25  
26  
27  
28  
29

30  
31 Of foreign-born Hispanics, 24% were born in the US Commonwealth of PR, none in the US  
32 Virgin Islands. Spanish language preference was less among Hispanics born in PR compared to  
33 other foreign-born Hispanics. PR-born Hispanics scored higher on the SASH language scale and  
34 social interaction scale indicating higher acculturation levels compared to other foreign-born  
35 Hispanics. However, the level of Spanish language preference and SASH scores was still lower  
36 among PR-born Hispanics compared to US born Hispanics. With regard to acculturation and  
37 health care utilization, being foreign-born, less years in the US and not having health insurance  
38 were all significantly associated with difficulty obtaining health care in the past year. Foreign-  
39 born individuals had less physician visits over the past year compared to US born. The relation  
40 between years in the US and physician visits was complex, non-linear and mirrored an opposite  
41  
42  
43  
44  
45  
46  
47  
48  
49  
50  
51  
52  
53  
54  
55  
56  
57  
58  
59  
60



1  
2  
3 pattern with income. **(Figure 2)** Having health insurance coverage was significantly associated  
4  
5 with more physician visits over the past year.  
6  
7

## 8 9 **Discussion**

10  
11 Hispanics/Latinos in the US represent a relatively young demographic such that the future public  
12  
13 health burden of HF as this population ages is potentially underestimated.<sup>27</sup> The Hispanic  
14  
15 population >65 years of age is expected to grow 328% between 2000 and 2030, making  
16  
17 Hispanics the fastest growing aging population in the US.<sup>28</sup> As the Hispanic population ages, and  
18  
19 HF risk factors and cardiac abnormalities progress, it is likely that an epidemic of HF in  
20  
21 Hispanics will emerge.  
22  
23  
24  
25

26  
27 Acculturation is complex and has four domains: (1) integration - maintaining attitudes and  
28  
29 behaviors of the original parent culture while adopting the host culture; (2) assimilation -  
30  
31 rejecting the ways of the parent culture and entirely adopting the host culture; (3) separation -  
32  
33 rejecting the host culture and keeping the practices and behaviors of the parent culture; and (4)  
34  
35 marginalization - not identifying with the original culture or the host culture. Prior studies show  
36  
37 strong negative effects of greater acculturation on worsening CV risk factors but positive effects  
38  
39 on use of preventive health services.<sup>29-31</sup> HCHS/SOL has demonstrated significant heterogeneity  
40  
41 in CVD risk factor burden among Hispanics/Latinos by country of origin and acculturation  
42  
43 measures.<sup>13</sup> Despite the current understanding of HF risk among Hispanics/Latinos,<sup>2,9</sup> our  
44  
45 analysis of validated acculturation scales provides several important contributions. First,  
46  
47 Spanish language preference and SASH scores were higher among Hispanics born in PR  
48  
49 compared to other foreign-born Hispanics but this proportion was still significantly less than US-  
50  
51 born Hispanics. Suggesting that for many, living in the island of PR still allows for maintenance  
52  
53  
54  
55  
56  
57

1  
2  
3 of a culture that is distinct from the US culture. Second, higher levels of acculturation, an  
4 important phenomenon among immigrant populations, was associated with abnormal cardiac  
5 structure and function in our predominately foreign-born, Spanish-speaking adult population  
6 despite long residence in the US. Third, different measures of acculturation (each capturing  
7 different aspects of the acculturative process) had varying associations with echocardiographic  
8 measures of structure and function. Finally, income significantly moderated these associations.  
9  
10 Our findings support the premise that exposure to the social and environmental stress of  
11 acculturation may promote unhealthy behaviors<sup>32</sup> and/or act via currently undefined pathways to  
12 contribute to HF risk among Hispanics/Latinos. **(Figure 2)** Further elucidating the acculturative  
13 factors influencing HF risk in Hispanics/Latinos is warranted.  
14  
15  
16  
17  
18  
19  
20  
21  
22  
23  
24  
25  
26  
27

28 Although to our knowledge, there is no existing literature on the association between  
29 acculturation and HF risk, our study found several measures of acculturation (increasing years of  
30 US residence, English preference, and younger age at immigration) were associated with  
31 abnormal cardiac structure and function (increased LAVI, increased LVMI, increased RWT,  
32 lower annular e' relaxation velocity and higher E/e' ratio). Although the magnitudes of our  
33 observed associations are modest, limiting the short-term clinical relevance of these findings, the  
34 long-term public health importance is likely high, given the potential for progression of cardiac  
35 damage with the accumulation of acculturative stress during the life course. This is particularly  
36 salient given the fact that abnormal cardiac structure and function is an independent risk factor  
37 for the future development of clinical HF. An increased E/e' ratio, LAVI, and LVMI are markers  
38 of chronically-elevated filling pressures associated with impaired cardiac relaxation and HF with  
39 preserved ejection fraction.<sup>33,34</sup> The presence of abnormal cardiac structure and function has been  
40  
41  
42  
43  
44  
45  
46  
47  
48  
49  
50  
51  
52  
53  
54  
55  
56  
57  
58  
59  
60

1  
2  
3 associated with increased HF hospitalizations, cardiovascular death and improved CV risk  
4 prediction.<sup>34-36</sup> Importantly, these cardiac abnormalities are additive, with worse outcomes seen  
5  
6 in individuals with more than one alteration.<sup>34</sup> In order to identify preclinical CV disease,  
7  
8 abnormalities in cardiac structure and function determined by echocardiography are important  
9  
10 intermediary measures, many of which have been associated with incident CVD, incident clinical  
11  
12 HF and increased mortality.<sup>5-7</sup> Given the size of the US Hispanic/Latino population and high  
13  
14 burden of acculturation (82% were foreign-born), echocardiography might help to identify a  
15  
16 particularly high risk subset of participants.  
17  
18  
19  
20  
21  
22  
23

24 LVM is associated with CVD, sudden cardiac death, and all-cause mortality.<sup>33</sup> Among foreign-  
25  
26 born Hispanics/Latinos, we found increased LVMI with increasing years in the US. Our study is  
27  
28 consistent with prior studies showing a high prevalence of LVM among Hispanics/Latinos  
29  
30 especially among low income Hispanics/Latinos with increasing years of US residence.<sup>18,37,38</sup>  
31  
32 Prior studies have demonstrated that adjustment for socioeconomic factors did not fully account  
33  
34 for the presence of increased LVMI among Hispanics/Latinos<sup>39</sup> possibly due to the residual  
35  
36 effect of acculturation. Changes in LVM can occur without overt clinical hypertension in  
37  
38 adrenergic states, such as chronic stress<sup>40</sup> with psychosocial factors such as perceived  
39  
40 discrimination and low social support.<sup>41,42</sup> Acculturative stress is the psychological impact or  
41  
42 stress reaction of navigating the acculturation process and making decisions on retaining one's  
43  
44 native culture while adapting to a new cultural context. Acculturation may act as a chronic  
45  
46 stressor, negatively affecting mental and physical health through unhealthy behaviors,<sup>30,32</sup>  
47  
48 increased anxiety, depression, perceived discrimination and lack of social support<sup>15,32,43</sup> which  
49  
50  
51  
52  
53  
54  
55  
56  
57  
58  
59  
60

1  
2  
3 may impact adrenergic biomarkers leadings to cardiac structural and functional abnormalities  
4  
5 and increased HF risk. This is another area of research to further explore in future studies.  
6  
7  
8  
9

10 The interaction of acculturation with SES on cardiac measures may shed light on the “Hispanic  
11 paradox” which states that Hispanics/Latinos, a disproportionately low SES group, have lower  
12 overall mortality and cardiovascular mortality compared to non-Hispanic Whites.<sup>2</sup> Low SES is a  
13 composite chronic stressor encompassing multiple factors (e.g., work, housing and financial  
14 strain). Longitudinal studies have shown an inverse association between SES level and adverse  
15 outcomes.<sup>41,44</sup> We hypothesized that less acculturation (more retention of host culture) may be  
16 protective of the adverse health consequences of low SES. In our study, those with higher SES  
17 (defined as annual incomes >\$20K) exhibited more deleterious effects of increasing  
18 acculturation on cardiac structural and functional measures. A prior study found the relationship  
19 between acculturation and health care utilization to be complex and moderated by SES.<sup>45</sup> Our  
20 exploratory analysis found that being foreign-born and having a higher income may make one  
21 less likely to utilize health care. A more extensive analysis on the complex nature of  
22 acculturation and health care utilization is beyond the scope of our paper but this area deserves  
23 further consideration in future studies. There may be more acculturative stress for higher-SES  
24 immigrants, perhaps through increased contact and interaction with the mainstream culture,<sup>46</sup>  
25 which may contribute to our findings. *Familismo* is a culture-specific factor characterized by  
26 having strong bonds with nuclear and extended family resulting in a high level of perceived  
27 family support and is associated with indicators of improved health.<sup>47,48</sup> Studies suggest that with  
28 increasing acculturation, *familismo* is eroded and dimensions of *familismo* begin to increase  
29 psychosocial stress rather than alleviate it.<sup>48-50</sup>  
30  
31  
32  
33  
34  
35  
36  
37  
38  
39  
40  
41  
42  
43  
44  
45  
46  
47  
48  
49  
50  
51  
52  
53  
54  
55  
56  
57  
58  
59  
60

1  
2  
3  
4  
5  
6 Several limitations should be noted. Our study is cross-sectional and precludes the ability to  
7  
8 assess the temporal sequence of the relationships and causal inference. However, our findings  
9  
10 warrant replication and longitudinal follow up. Participants resided in one of four US cities,  
11  
12 precluding generalizability to all Hispanic/Latinos in the US. While this study is one of the  
13  
14 largest studies of acculturation with cardiac structure and function in any population, the sample  
15  
16 size is relatively modest; thus, we were underpowered to perform stratified analyses by national  
17  
18 origin in order to characterize the heterogeneity within Hispanic/Latinos. We are specifically  
19  
20 referring to acculturation into the US culture, which may not be generalizable to acculturation in  
21  
22 other settings. Finally, our study focuses on acculturation as a unique intra-ethnic phenomenon.  
23  
24 By including several measures (nativity, years of US residence/age at migration, SASH  
25  
26 subscales, language preference and generational status) our goal was to be comprehensive and to  
27  
28 capture several aspects of acculturation. We believe acculturation cannot be captured by just one  
29  
30 measure, as has been done in much of the prior literature; however, we agree that even our  
31  
32 multivariable approach may not fully capture the complexities of all aspects and dimensions of  
33  
34 the acculturative process.  
35  
36  
37  
38  
39  
40  
41

## 42 **Conclusions**

43  
44 In addition to traditional CV risk factors, acculturation may explain the disproportionate burden  
45  
46 of HF risk among Hispanics/Latinos. Our study found significant associations between several  
47  
48 acculturation measures with deleterious cardiac structural and functional parameters among a  
49  
50 predominantly low-SES, foreign-born Hispanic/Latino population with increasing years of  
51  
52 residence in the US. The acculturation experience is not unique to Hispanics/Latinos. Our study  
53  
54  
55  
56  
57

1  
2  
3 may help generate further research in other immigrant populations. Further elucidation of how  
4 acculturation impacts HF risk is warranted in order to possibly risk stratify a high-risk subgroup  
5 of Hispanics/Latinos and to inform the development of culturally appropriate interventions to  
6 amplify protective factors and to make the acculturative process less deleterious for  
7  
8  
9  
10  
11  
12  
13  
14  
15  
16  
17  
18  
19  
20  
21  
22  
23  
24  
25  
26  
27  
28  
29  
30  
31  
32  
33  
34  
35  
36  
37  
38  
39  
40  
41  
42  
43  
44  
45  
46  
47  
48  
49  
50  
51  
52  
53  
54  
55  
56  
57  
58  
59  
60

Hispanics/Latinos and other immigrants.

For peer review only

1  
2  
3 **Acknowledgements:** The authors thank the staff and participants of HCHS/SOL and ECHO-  
4 SOL for their important contributions. Investigators website - <http://www.cscs.unc.edu/hchs/>  
5  
6

7 **Contributors: Research Conception and design:** CJR, LL; **Collection and assembly of data:**  
8 CJR, MAA, RK, LCG; **Analysis and interpretation of the data:** CJR, LL, KS; **Drafting of the**  
9 **article:** CJR, LL, FR; **Critical revision of the article for important intellectual content:** CJR,  
10 LL, FR, JRK, FJP, LCG, WA, FG; **Obtaining of funding:** CJR, RK, MAA; **Statistical**  
11 **expertise:** KS, FG  
12  
13

14  
15  
16 CJR and LL are responsible for the overall content as guarantors.  
17

18 **Funding:** This study supported by contracts from the National Heart, Lung, and Blood Institute  
19 (NHLBI) to the University of North Carolina (N01-HC65233), University of Miami (N01-  
20 HC65234), Albert Einstein College of Medicine (N01-HC65235), Northwestern University  
21 (N01-HC65236), and San Diego State University (N01-HC65237). The following institutes  
22 contributed to HCHS/SOL: National Institute on Minority Health and Health Disparities,  
23 National Institute on Deafness and Other Communication Disorders, National Institute of Dental  
24 and Craniofacial Research, National Institute of Diabetes and Digestive and Kidney Diseases,  
25 National Institute of Neurological Disorders and Stroke, NIH Institution-Office of Dietary  
26 Supplements.  
27  
28

29  
30  
31  
32  
33 ECHO-SOL was supported by the National Heart, Lung, and Blood Institute  
34 (R01 HL104199, Epidemiologic Determinants of Cardiac Structure and Function among  
35 Hispanics: Carlos J. Rodriguez, MD, MPH Principal Investigator). Dr. Lenny L. López  
36 acknowledges the support of the Robert Wood Johnson Foundation Harold Amos Medical  
37 Faculty Development Program and NIDDK 1K23DK098280-01. No relationships with industry  
38 supported this work.  
39  
40  
41  
42  
43

44 **Competing interests:** None declared.  
45

46 **Patient consent for publication:** Not required.  
47

48  
49 **Ethics approval:** The Institutional Review Board at the Wake Forest School of Medicine and at  
50 each study site provided approval and oversight of all study materials and activities.  
51

52  
53 **Data sharing statement:** Data is publically available on request.  
54  
55  
56  
57

## REFERENCES

1. Mozaffarian D, Benjamin EJ, Go AS, et al. Heart Disease and Stroke Statistics—2015 Update: A Report From the American Heart Association. *Circulation* 2015;131:e29-e322.
2. Rodriguez CJ, Allison M, Daviglius ML, et al. Status of cardiovascular disease and stroke in Hispanics/Latinos in the United States: a science advisory from the American Heart Association. *Circulation* 2014;130:593-625.
3. Mehta H, Armstrong A, Swett K, et al. Burden of Systolic and Diastolic Left Ventricular Dysfunction Among Hispanics in the United States: Insights From the Echocardiographic Study of Latinos. *Circ Heart Fail* 2016;9.
4. Yancy CW, Jessup M, Bozkurt B, et al. 2013 ACCF/AHA guideline for the management of heart failure: a report of the American College of Cardiology Foundation/American Heart Association Task Force on Practice Guidelines. *J Am Coll Cardiol* 2013;62:e147-239.
5. Hobbs FD, Roalfe AK, Davis RC, Davies MK, Hare R, Midlands Research Practices C. Prognosis of all-cause heart failure and borderline left ventricular systolic dysfunction: 5 year mortality follow-up of the Echocardiographic Heart of England Screening Study (ECHOES). *Eur Heart J* 2007;28:1128-34.
6. Armstrong AC, Jacobs DR, Jr., Gidding SS, et al. Framingham score and LV mass predict events in young adults: CARDIA study. *Int J Cardiol* 2014;172:350-5.
7. Bombelli M, Facchetti R, Cuspidi C, et al. Prognostic significance of left atrial enlargement in a general population: results of the PAMELA study. *Hypertension* 2014;64:1205-11.
8. Echouffo-Tcheugui JB, Erqou S, Butler J, Yancy CW, Fonarow GC. Assessing the Risk of Progression From Asymptomatic Left Ventricular Dysfunction to Overt Heart Failure: A Systematic Overview and Meta-Analysis. *JACC Heart Fail* 2016;4:237-48.
9. Vivo RP, Krim SR, Cevik C, Witteles RM. Heart failure in Hispanics. *J Am Coll Cardiol* 2009;53:1167-75.
10. Vivo RP, Krim SR, Krim NR, et al. Care and outcomes of Hispanic patients admitted with heart failure with preserved or reduced ejection fraction: findings from get with the guidelines-heart failure. *Circ Heart Fail* 2012;5:167-75.



11. Bahrami H, Kronmal R, Bluemke DA, et al. Differences in the incidence of congestive heart failure by ethnicity: the multi-ethnic study of atherosclerosis. *Archives of internal medicine* 2008;168:2138-45.
12. Zambrana RE, Carter-Pokras O. Role of acculturation research in advancing science and practice in reducing health care disparities among Latinos. *Am J Public Health* 2010;100:18-23.
13. Daviglius ML, Talavera GA, Aviles-Santa ML, et al. Prevalence of major cardiovascular risk factors and cardiovascular diseases among Hispanic/Latino individuals of diverse backgrounds in the United States. *Jama* 2012;308:1775-84.
14. Ayala GX, Baquero B, Klinger S. A systematic review of the relationship between acculturation and diet among Latinos in the United States: implications for future research. *J Am Diet Assoc* 2008;108:1330-44.
15. Steptoe A, Kivimaki M. Stress and cardiovascular disease: an update on current knowledge. *Annu Rev Public Health* 2013;34:337-54.
16. Suh M, Barksdale DJ, Logan J. Relationships among acculturative stress, sleep, and nondipping blood pressure in Korean American women. *Clin Nurs Res* 2013;22:112-29.
17. Peterson PN, Campagna EJ, Maravi M, et al. Acculturation and outcomes among patients with heart failure. *Circ Heart Fail* 2012;5:160-6.
18. Effoe VS, Chen H, Moran A, et al. Acculturation is associated with left ventricular mass in a multiethnic sample: the Multi-Ethnic Study of Atherosclerosis. *BMC Cardiovasc Disord* 2015;15:161.
19. Rodriguez CJ, Sciacca RR, Diez-Roux AV, et al. Relation between socioeconomic status, race-ethnicity, and left ventricular mass: the Northern Manhattan study. *Hypertension* 2004;43:775-9.
20. Lee H, Cardinal BJ, Loprinzi PD. Effects of socioeconomic status and acculturation on accelerometer-measured moderate-to-vigorous physical activity among Mexican American adolescents: findings from NHANES 2003-2004. *J Phys Act Health* 2012;9:1155-62.
21. Lavange LM, Kalsbeek WD, Sorlie PD, et al. Sample design and cohort selection in the Hispanic Community Health Study/Study of Latinos. *Ann Epidemiol* 2010;20:642-9.
22. Rodriguez CJ, Dharod A, Allison MA, et al. Rationale and Design of the Echocardiographic Study of Hispanics/Latinos (ECHO-SOL). *Ethnicity & disease* 2015;25:180-6.

- 1  
2  
3 23. Cleland CL, Hunter RF, Kee F, Cupples ME, Sallis JF, Tully MA. Validity of the global  
4 physical activity questionnaire (GPAQ) in assessing levels and change in moderate-vigorous  
5 physical activity and sedentary behaviour. *BMC Public Health* 2014;14:1255.  
6  
7 24. Lang RM, Bierig M, Devereux RB, et al. Recommendations for chamber quantification: a  
8 report from the American Society of Echocardiography's Guidelines and Standards Committee  
9 and the Chamber Quantification Writing Group, developed in conjunction with the European  
10 Association of Echocardiography, a branch of the European Society of Cardiology. *Journal of*  
11 *the American Society of Echocardiography* : official publication of the American Society of  
12 Echocardiography 2005;18:1440-63.  
13  
14 25. Ommen SR, Nishimura RA, Appleton CP, et al. Clinical utility of Doppler  
15 echocardiography and tissue Doppler imaging in the estimation of left ventricular filling  
16 pressures - A comparative simultaneous Doppler-Catheterization study. *Circulation*  
17 2000;102:1788-94.  
18  
19 26. Marin G, Sabogal F, Marin BV, Otero-Sabogal F, and Perez-Stable E. Development of a  
20 short acculturation scale for Hispanics. *Hispanic Journal of Behavioral Sciences* 1987;9:183-205.  
21  
22 27. Rangel MO, Kaplan R, Daviglius M, et al. Estimation of Incident Heart Failure Risk  
23 among US Hispanics/Latinos Using a Validated Echocardiographic Risk-Stratification Index: the  
24 Echocardiographic Study of Latinos. *J Card Fail* 2018;24:622-4.  
25  
26 28. US Census Bureau. 65+ in the United States:2005. *Current Population Reports* December  
27 2005.  
28  
29 29. Moran A, Diez Roux AV, Jackson SA, et al. Acculturation is associated with  
30 hypertension in a multiethnic sample. *Am J Hypertens* 2007;20:354-63.  
31  
32 30. Abraido-Lanza AF, Chao MT, Florez KR. Do healthy behaviors decline with greater  
33 acculturation? Implications for the Latino mortality paradox. *Soc Sci Med* 2005;61:1243-55.  
34  
35 31. DuBard CA, Gizlice Z. Language spoken and differences in health status, access to care,  
36 and receipt of preventive services among US Hispanics. *Am J Public Health* 2008;98:2021-8.  
37  
38 32. Lara M, Gamboa C, Kahramanian MI, Morales LS, Bautista DE. Acculturation and  
39 Latino health in the United States: a review of the literature and its sociopolitical context. *Annu*  
40 *Rev Public Health* 2005;26:367-97.  
41  
42 33. Abbate A, Arena R, Abouzaki N, et al. Heart failure with preserved ejection fraction:  
43 refocusing on diastole. *Int J Cardiol* 2015;179:430-40.  
44  
45  
46  
47  
48  
49  
50  
51  
52  
53  
54  
55  
56  
57  
58  
59  
60

- 1  
2  
3 34. Shah AM, Claggett B, Sweitzer NK, et al. Cardiac structure and function and prognosis  
4 in heart failure with preserved ejection fraction: findings from the echocardiographic study of the  
5 Treatment of Preserved Cardiac Function Heart Failure with an Aldosterone Antagonist  
6 (TOPCAT) Trial. *Circ Heart Fail* 2014;7:740-51.  
7  
8  
9 35. Zile MR, Gottdiener JS, Hetzel SJ, et al. Prevalence and significance of alterations in  
10 cardiac structure and function in patients with heart failure and a preserved ejection fraction.  
11 *Circulation* 2011;124:2491-501.  
12  
13 36. Burke MA, Katz DH, Beussink L, et al. Prognostic importance of pathophysiologic  
14 markers in patients with heart failure and preserved ejection fraction. *Circ Heart Fail* 2014;7:288-  
15 99.  
16  
17 37. Zabalgoitia M, Ur Rahman SN, Haley WE, et al. Impact of ethnicity on left ventricular  
18 mass and relative wall thickness in essential hypertension. *Am J Cardiol* 1998;81:412-7.  
19  
20 38. Rodriguez CJ, Diez-Roux AV, Moran A, et al. Left ventricular mass and ventricular  
21 remodeling among Hispanic subgroups compared with non-Hispanic blacks and whites: MESA  
22 (Multi-ethnic Study of Atherosclerosis). *J Am Coll Cardiol* 2010;55:234-42.  
23  
24 39. Rodriguez CJ, Lin F, Sacco RL, et al. Prognostic implications of left ventricular mass  
25 among Hispanics: the Northern Manhattan Study. *Hypertension* 2006;48:87-92.  
26  
27 40. Julius S, Li Y, Brant D, Krause L, Buda AJ. Neurogenic pressor episodes fail to cause  
28 hypertension, but do induce cardiac hypertrophy. *Hypertension* 1989;13:422-9.  
29  
30 41. Rozanski A, Blumenthal JA, Davidson KW, Saab PG, Kubzansky L. The epidemiology,  
31 pathophysiology, and management of psychosocial risk factors in cardiac practice: the emerging  
32 field of behavioral cardiology. *J Am Coll Cardiol* 2005;45:637-51.  
33  
34 42. Rodriguez CJ, Elkind MS, Clemow L, et al. Association between social isolation and left  
35 ventricular mass. *Am J Med* 2011;124:164-70.  
36  
37 43. Gallo LC, Penedo FJ, Espinosa de los Monteros K, Arguelles W. Resiliency in the face of  
38 disadvantage: do Hispanic cultural characteristics protect health outcomes? *J Pers* 2009;77:1707-  
39 46.  
40  
41 44. Gallo LC, de Los Monteros KE, Allison M, et al. Do socioeconomic gradients in  
42 subclinical atherosclerosis vary according to acculturation level? Analyses of Mexican-  
43 Americans in the multi-ethnic study of atherosclerosis. *Psychosom Med* 2009;71:756-62.  
44  
45  
46  
47  
48  
49  
50  
51  
52  
53  
54  
55  
56  
57  
58  
59  
60

- 1  
2  
3 45. Peng BL, Zou GY, Chen W, Lin YW, Ling L. Association between health service  
4 utilisation of internal migrant children and parents' acculturation in Guangdong, China: a cross-  
5 sectional study. *BMJ Open* 2018;8:e018844.  
6  
7  
8 46. McClure LA, Zheng DD, Lam BL, et al. Factors Associated With Ocular Health Care  
9 Utilization Among Hispanics/Latinos: Results From an Ancillary Study to the Hispanic  
10 Community Health Study/Study of Latinos (HCHS/SOL). *JAMA Ophthalmol* 2016;134:320-9.  
11  
12 47. Davila YR, Reifsnider E, Pecina I. Familismo: influence on Hispanic health behaviors.  
13 *Appl Nurs Res* 2011;24:e67-72.  
14  
15 48. Sabogal F, Marin G, Otero-Sabogal R, Marin B. Hispanic familism and acculturation:  
16 What changes and what doesn't? *Hispanic Journal of Behavioral Sciences* 1987;9:397-412.  
17  
18 49. Miranda A, Estrada D, Firpo-Jimenez M. Differences in family cohesion, adaptability,  
19 and environment among Latino families in dissimilar stages of acculturation. *The Family Journal*  
20 2000;8:341-50.  
21  
22 50. Rodriguez N, Mira C, Paez N, Myers H. Exploring the complexities of familism and  
23 acculturation: central constructs for people of Mexican origin. *Am J Community Psychol*  
24 2007;39:61-77.  
25  
26  
27  
28  
29  
30  
31  
32  
33  
34  
35  
36  
37  
38  
39  
40  
41  
42  
43  
44  
45  
46  
47  
48  
49  
50  
51  
52  
53  
54  
55  
56  
57  
58  
59  
60

Table 1. ECHO-SOL Demographic and Clinical Characteristics (N = 1,818)<sup>†</sup>

| <b>Demographic Characteristics</b>                     | <b>[N (%)]</b>     |
|--------------------------------------------------------|--------------------|
| Women                                                  | 1187 (57.4)        |
| Age, [mean (SE)]                                       | 56.4 (0.37)        |
| High School Graduate or Higher                         | 726 (43.3)         |
| Annual Family Income > \$20,000                        | 787 (45.5)         |
| Marital Status                                         |                    |
| Single                                                 | 332 (18.8)         |
| Married/Partner                                        | 961 (53.2)         |
| Separated/Divorced/Widow                               | 522 (28.0)         |
| Health Insurance                                       | 1042 (60.1)        |
|                                                        |                    |
| <b>Short Acculturation Scale for Hispanics (SASH)</b>  | <b>[mean (SE)]</b> |
| Language Use Subscale                                  | 1.7 (0.05)         |
| Social Relations Subscale                              | 2.1 (0.03)         |
| Length of US residence                                 | <b>[N (%)]</b>     |
| <5 years                                               | 178 (13.6)         |
| 5-10 years                                             | 247 (15.2)         |
| 11-20                                                  | 385 (22.1)         |
| >20                                                    | 842 (49.1)         |
| Second generation or higher                            | 185 (9.3)          |
| English language preference                            | 225 (14.0)         |
| Age at migration [mean (SE)]                           | 34.0 (1.0)         |
| US born                                                | 163 (7.9)          |
|                                                        |                    |
| <b>Clinical Characteristics</b>                        | <b>[N (%)]</b>     |
| Hypertension                                           | 861 (50.0)         |
| Type 2 Diabetes                                        | 523 (28.4)         |
| Current Smoker                                         | 304 (17.6)         |
| Physical activity level low                            | 1227 (67.3)        |
| BMI ≥30                                                | 822 (44.3)         |
| Current Alcohol Use                                    | 770 (43.5)         |
|                                                        |                    |
| <b>Echocardiographic Variables</b>                     | <b>[mean (SE)]</b> |
| Left Atrial Volume Index (≤33 mL/m <sup>2</sup> )      | 23.0 (0.25)        |
| Relative Wall Thickness (0.22-0.42)                    | 0.40 (0.004)       |
| Left Ventricular Mass Index (45-105 g/m <sup>2</sup> ) | 82.7 (0.7)         |
| Ejection Fraction (≥55 %)                              | 59.8 (0.2)         |
| E prime (e') (8-16 cm/s)                               | 8.1 (0.09)         |
| E/e' (≤12)                                             | 10.0 (0.12)        |
| Diastolic Dysfunction [N (%)]                          | 916 (51.9)         |

<sup>†</sup>N's presented are unweighted counts of total participants in the ECHO-SOL with each respective characteristic.

Percentages are weighted row percentages.

Normal values are provided for cardiac structure and function variables.

Table 2. Adjusted Analyses of Acculturation Measures with Cardiac Structure and Function.\*

|                                       | <b>LVMI (g/m<sup>2</sup>)</b><br>β (p) | <b>RWT</b><br>β (p)       | <b>LAVI (mL/m<sup>2</sup>)</b><br>β (p) | <b>LVEF (%)</b><br>β (p) | <b>e' (cm/s)</b><br>β (p) | <b>E/e'</b><br>β (p) |
|---------------------------------------|----------------------------------------|---------------------------|-----------------------------------------|--------------------------|---------------------------|----------------------|
| <b>Nativity</b>                       |                                        |                           |                                         |                          |                           |                      |
| Age, sex                              | —                                      | —                         | —                                       | —                        | -0.349 (0.12)             | 0.571 (0.02)         |
| Model 1                               | —                                      | —                         | —                                       | —                        | -0.320 (0.10)             | 0.524 (0.02)         |
| Model 2                               | —                                      | —                         | —                                       | —                        | -0.324 (0.14)             | 0.532 (0.02)         |
| Model 3                               | —                                      | —                         | —                                       | —                        | -0.303 (0.12)             | 0.503 (0.02)         |
| <b>Foreign Born (Years in the US)</b> |                                        |                           |                                         |                          |                           |                      |
| Age, sex                              | —                                      | 0.020 (0.06); all (0.03)  | 1.57 (0.02); all (<0.05)                | —                        | —                         | —                    |
| Model 1                               | —                                      | 0.022 (0.02); all (0.02)  | 1.63 (0.02); all (<0.05)                | —                        | —                         | —                    |
| Model 2                               | —                                      | 0.018 (0.06); all (0.02)  | 1.55 (0.02); all (0.05)                 | —                        | —                         | —                    |
| Model 3                               | —                                      | 0.021 (0.02); all (0.007) | 1.71 (0.01); all (0.04)                 | —                        | —                         | —                    |
| <b>Generation</b>                     |                                        |                           |                                         |                          |                           |                      |
| Age, sex                              | —                                      | —                         | -0.468 (0.21)                           | —                        | -0.529 (0.01)             | 0.710 (0.002)        |
| Model 1                               | —                                      | —                         | -1.797 (0.004)                          | —                        | -0.447 (0.01)             | 0.594 (0.003)        |
| Model 2                               | —                                      | —                         | -1.444 (0.03)                           | —                        | -0.499 (0.01)             | 0.671 (0.003)        |
| Model 3                               | —                                      | —                         | -1.584 (0.01)                           | —                        | -0.425 (0.02)             | 0.575 (0.006)        |
| <b>SASH Language</b>                  |                                        |                           |                                         |                          |                           |                      |
| Age, sex                              | —                                      | —                         | 0.580 (0.01)                            | —                        | 0.125 (0.10)              | —                    |
| Model 1                               | —                                      | —                         | 0.610 (0.008)                           | —                        | 0.097 (0.11)              | —                    |
| Model 2                               | —                                      | —                         | 0.546 (0.01)                            | —                        | 0.123 (0.15)              | —                    |
| Model 3                               | —                                      | —                         | 0.590 (0.007)                           | —                        | 0.095 (0.16)              | —                    |
| <b>Age at Immigration</b>             |                                        |                           |                                         |                          |                           |                      |
| Age, sex                              | —                                      | 0.0005 (0.15)             | -0.040 (0.008)                          | —                        | -0.005 (0.27)             | —                    |
| Model 1                               | —                                      | 0.0005 (0.13)             | -0.040 (0.008)                          | —                        | -0.006 (0.14)             | —                    |
| Model 2                               | —                                      | 0.0004 (0.15)             | -0.038 (<0.001)                         | —                        | -0.005 (0.37)             | —                    |
| Model 3                               | —                                      | 0.0004 (0.13)             | -0.038 (0.01)                           | —                        | -0.005 (0.22)             | —                    |

\*Only acculturation measures that were significant in unadjusted analyses were analyzed in multivariable adjusted models.  
 For Years in the US, the 1<sup>st</sup> p-value reflects <5 years vs. >20 years comparison; whereas the 2<sup>nd</sup> p-value is for overall comparison across all the Years in the US categories (<5; 5-10; 11-20; >20)  
 Model 1: Age, Sex, Diabetes, Hypertension, Obesity | Model 2: Age, Sex, Physical Activity, Tobacco, Alcohol Use | Model 3: Model 1 + Model 2  
 LVMI = Left ventricular mass index; RWT = Relative wall thickness; LAVI = Left atrial volume index; LVEF = Left ventricular ejection fraction  
 e' = Mitral annular early diastolic velocity; E/e' = Ratio between early mitral inflow velocity and mitral annular early diastolic velocity

Table 3. Unadjusted and Adjusted<sup>‡</sup> Analyses of Acculturation Measures with Diastolic Dysfunction.

|                            |                   | Adjusted Sequential Models |                   |                  |                   |
|----------------------------|-------------------|----------------------------|-------------------|------------------|-------------------|
|                            | Unadjusted        | Age, Sex                   | Model 1           | Model 2          | Model 3           |
| <b>Nativity</b>            |                   |                            |                   |                  |                   |
| Foreign born               | 1.67 (1.08-2.58)  | 0.98 (0.62-1.55)           | 0.94 (0.59-1.51)  | 0.98 (0.62-1.55) | 0.95 (0.59-1.53)  |
| US born                    | Ref               |                            |                   |                  |                   |
| <b>Years in the US</b>     |                   |                            |                   |                  |                   |
| <5                         | 0.86 (0.60-1.24)  | —                          | —                 | —                | —                 |
| 5-10                       | 0.72 (0.49-1.04)  |                            |                   |                  |                   |
| 11-20                      | 0.91 (0.61-1.37)  |                            |                   |                  |                   |
| >20                        | Ref               |                            |                   |                  |                   |
| <b>Generation</b>          |                   |                            |                   |                  |                   |
| 1                          | 1.90 (1.24-2.92)  | 1.29 (0.77-2.14)           | 1.18 (0.74-1.91)  | 1.26(0.77-2.06)  | 1.18 (0.73-1.89)  |
| 2                          | Ref               |                            |                   |                  |                   |
| <b>Language Preference</b> |                   |                            |                   |                  |                   |
| English                    | 0.67 (0.34-1.32)  | —                          | —                 | —                | —                 |
| Spanish                    | Ref               |                            |                   |                  |                   |
| <b>SASH Language</b>       | 0.81 (0.67-0.98)  | —                          | —                 | —                | —                 |
| <b>SASH Social</b>         | 0.88 (0.68-1.15)  | —                          | —                 | —                | —                 |
| <b>Age at Immigration</b>  | 1.02 (1.004-1.03) | 1.00 (0.99-1.02)           | 1.01 (0.995-1.02) | 1.01 (0.99-1.02) | 1.01 (0.995-1.02) |

<sup>‡</sup>Only acculturation measures that were significant in unadjusted analyses were analyzed in adjusted models.

ORs (95% CIs) are presented

Model 1: Age, Sex, Diabetes, Hypertension, Obesity

Model 2: Age, Sex, Physical Activity, Tobacco, Alcohol Use

Model 3: Model 1 + Model 2

1  
2  
3 Figure Legend:  
4  
5

6 Figure 1. Proposed Relationships Between Acculturation with Cardiac Structure and Function.  
7

8 Figure 2. Relation of Years Residing in the US or Income Level with Number of Physician Visits  
9  
10  
11  
12  
13  
14  
15  
16  
17  
18  
19  
20  
21  
22  
23  
24  
25  
26  
27  
28  
29  
30  
31  
32  
33  
34  
35  
36  
37  
38  
39  
40  
41  
42  
43  
44  
45  
46  
47

For peer review only



Figure 1.

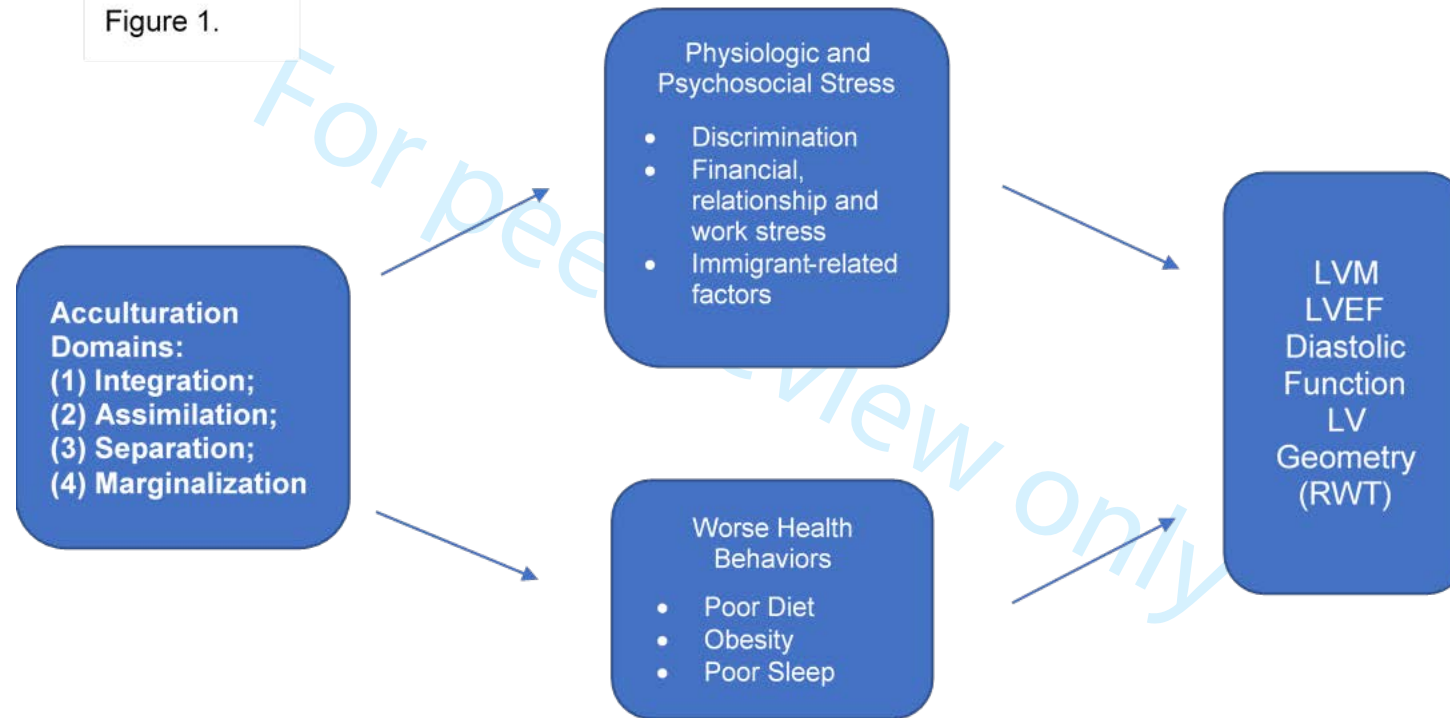

1  
2  
3  
4  
5  
6  
7  
8  
9  
10  
11  
12  
13  
14  
15  
16  
17  
18  
19  
20  
21  
22  
23  
24  
25  
26  
27  
28  
29  
30  
31  
32  
33  
34  
35  
36  
37  
38  
39  
40  
41

Figure 2.

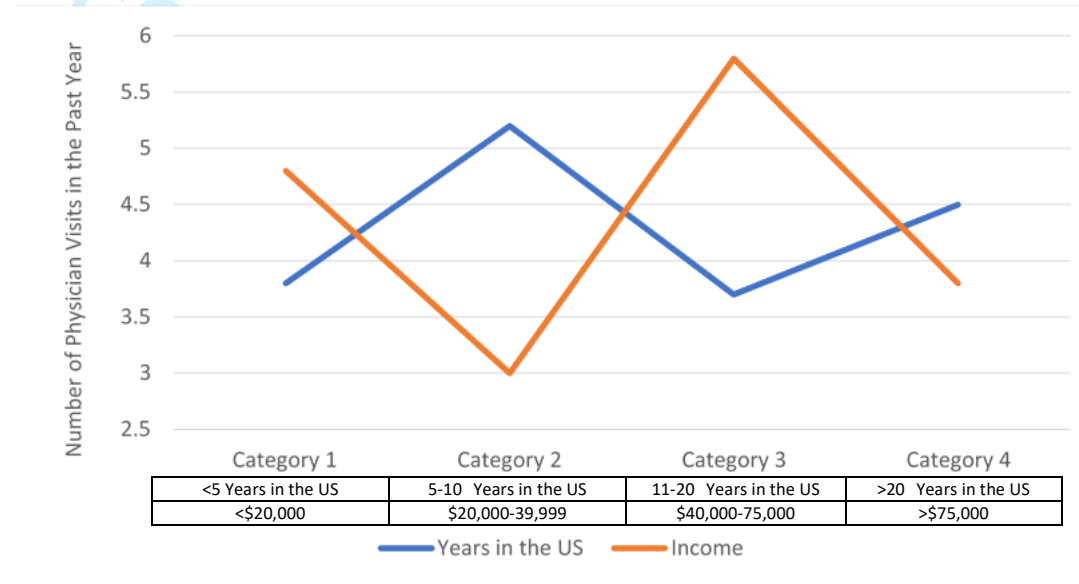

Table S1. Unadjusted Acculturation Measures with Echocardiographic Measures of Cardiac Structure and Function.

|                             | LVMI (g/m <sup>2</sup> ) |      | RWT                |      | LAVI (mL/m <sup>2</sup> ) |      | LVEF (%)          |      | e' (cm/s)         |        | E/e'              |        |
|-----------------------------|--------------------------|------|--------------------|------|---------------------------|------|-------------------|------|-------------------|--------|-------------------|--------|
| <b>Categorical Measures</b> |                          |      |                    |      |                           |      |                   |      |                   |        |                   |        |
|                             | Mean                     | p    | Mean               | p    | Mean                      | p    | Mean              | p    | Mean              | p      | Mean              | p      |
| Nativity                    |                          |      |                    |      |                           |      |                   |      |                   |        |                   |        |
| Foreign Born                | 82.74                    | 0.92 | 0.40               | 0.07 | 22.93                     | 0.10 | 59.83             | 0.54 | 7.98              | <0.001 | 10.1              | <0.001 |
| US Born                     | 82.54                    |      | 0.38               |      | 24.10                     |      | 59.50             |      | 8.99              |        | 8.8               |        |
| Years in US                 |                          |      |                    |      |                           |      |                   |      |                   |        |                   |        |
| <5 years                    | 79.80                    | 0.16 | 0.41               | 0.03 | 21.70                     | 0.03 | 59.94             | 0.09 | 7.71              | 0.11   | 10.2              | 0.25   |
| 5-10 years                  | 80.43                    |      | 0.39               |      | 22.40                     |      | 60.04             |      | 8.18              |        | 9.7               |        |
| 11-20 years                 | 83.60                    |      | 0.41               |      | 22.82                     |      | 58.94             |      | 8.27              |        | 9.8               |        |
| >20 years                   | 83.96                    |      | 0.39               |      | 23.50                     |      | 60.14             |      | 7.86              |        | 10.2              |        |
| Generation                  |                          |      |                    |      |                           |      |                   |      |                   |        |                   |        |
| First                       | 82.69                    | 0.88 | 0.40               | 0.08 | 22.89                     | 0.02 | 59.84             | 0.45 | 7.97              | <0.001 | 10.1              | <0.001 |
| Second or Greater           | 82.96                    |      | 0.38               |      | 24.41                     |      | 59.45             |      | 9.01              |        | 8.8               |        |
| Language                    |                          |      |                    |      |                           |      |                   |      |                   |        |                   |        |
| English                     | 81.51                    | 0.59 | 0.38               | 0.08 | 24.00                     | 0.06 | 60.13             | 0.48 | 8.52              | 0.15   | 9.7               | 0.64   |
| Spanish                     | 82.92                    |      | 0.40               |      | 22.87                     |      | 59.75             |      | 7.99              |        | 10.0              |        |
| <b>Continuous Measures</b>  |                          |      |                    |      |                           |      |                   |      |                   |        |                   |        |
|                             | $\beta$ (se)             | p    | $\beta$ (se)       | p    | $\beta$ (se)              | p    | $\beta$ (se)      | p    | $\beta$ (se)      | p      | $\beta$ (se)      | p      |
| Age at Immigration          | -0.0003<br>(0.0632)      | 0.99 | 0.0006<br>(0.0003) | 0.02 | -0.030<br>(0.014)         | 0.03 | -0.003<br>(0.012) | 0.79 | -0.023<br>(0.007) | 0.001  | 0.012<br>(0.010)  | 0.23   |
| SASH Subscales              |                          |      |                    |      |                           |      |                   |      |                   |        |                   |        |
| Language                    | 0.087<br>(0.735)         | 0.91 | -0.005<br>(0.003)  | 0.10 | 0.539<br>(0.237)          | 0.02 | 0.166<br>(0.180)  | 0.36 | 0.255<br>(0.098)  | 0.009  | -0.205<br>(0.109) | 0.06   |
| Social Relations            | 0.086<br>(1.392)         | 0.95 | -0.009<br>(0.006)  | 0.15 | 0.732<br>(0.373)          | 0.05 | 0.539<br>(0.295)  | 0.07 | 0.266<br>(0.155)  | 0.09   | -0.156<br>(0.217) | 0.47   |

LVMI = Left ventricular mass index; RWT = Relative wall thickness; LAVI = Left atrial volume index

LVEF = Left ventricular ejection fraction; e' = Mitral annular early diastolic velocity

E/e' = Ratio between early mitral inflow velocity and mitral annular early diastolic velocity

1  
2  
3  
4  
5  
6  
7  
8  
9  
10  
11  
12  
13  
14  
15  
16  
17  
18  
19  
20  
21  
22  
23  
24  
25  
26  
27  
28  
29  
30  
31  
32  
33  
34  
35  
36  
37  
38  
39  
40  
41  
42  
43  
44  
45  
46  
47

Table S2. Income Stratified Adjusted Analyses of Acculturation Measures with Cardiac Structure and Function.<sup>‡</sup>

|                            | LVMI (g/m <sup>2</sup> ) |      |           |       | LAVI (mL/m <sup>2</sup> ) |      |           |      | e' (cm/s) |        |           |       | E/e'      |       |           |       | Diastolic Dysfunction |              |
|----------------------------|--------------------------|------|-----------|-------|---------------------------|------|-----------|------|-----------|--------|-----------|-------|-----------|-------|-----------|-------|-----------------------|--------------|
|                            | <\$20,000                |      | >\$20,000 |       | <\$20,000                 |      | >\$20,000 |      | <\$20,000 |        | >\$20,000 |       | <\$20,000 |       | >\$20,000 |       | <\$20,000             | >\$20,000    |
|                            | Mean                     | p    | Mean      | p     | Mean                      | p    | Mean      | p    | Mean      | p      | Mean      | p     | Mean      | p     | Mean      | p     | ORs (95% CI)          | ORs (95% CI) |
| <b>Nativity</b>            |                          |      |           |       |                           |      |           |      |           |        |           |       |           |       |           |       |                       |              |
| Foreign                    | —                        | —    | —         | —     | —                         | —    | —         | —    | 7.90      | 0.0006 | 8.24      | 0.048 | —         | —     | —         | —     | 1.67 (0.89-           | 1.24 (0.70-  |
| US born                    |                          |      |           |       |                           |      |           |      | 8.83      |        | 8.99      |       |           |       |           |       | 3.14)                 | 2.19)        |
| <b>Years in the US</b>     |                          |      |           |       |                           |      |           |      |           |        |           |       |           |       |           |       |                       |              |
| <5                         | 80.02                    |      | 73.35     |       |                           |      |           |      | 7.70      |        | 9.03      |       | 10.20     |       | 9.17      |       |                       |              |
| 5-10                       | 81.32                    | 0.15 | 79.38     | 0.002 | —                         | —    | —         | —    | 7.72      | 0.27   | 8.87      | 0.001 | 10.36     | 0.62  | 8.63      | 0.003 | —                     | —            |
| 11-20                      | 82.22                    |      | 86.12     |       |                           |      |           |      | 8.23      |        | 8.56      |       | 9.912     |       | 9.49      |       |                       |              |
| >20                        | 85.73                    |      | 82.23     |       |                           |      |           |      | 7.87      |        | 7.89      |       | 10.28     |       | 10.16     |       |                       |              |
| <b>Generation</b>          |                          |      |           |       |                           |      |           |      |           |        |           |       |           |       |           |       |                       |              |
| 1                          | —                        | —    | —         | —     | 23.04                     | 0.45 | 22.85     | 0.02 | —         | —      | —         | —     | —         | —     | —         | —     | 1.82 (0.99-           | 1.50 (0.83-  |
| 2                          |                          |      |           |       | 23.91                     |      | 24.67     |      |           |        |           |       |           |       |           |       | 3.34)                 | 2.69)        |
| <b>Language Preference</b> |                          |      |           |       |                           |      |           |      |           |        |           |       |           |       |           |       |                       |              |
| English                    | —                        | —    | —         | —     | —                         | —    | —         | —    | —         | —      | —         | —     | 9.42      | 0.01  | 10.00     | 0.63  | —                     | —            |
| Spanish                    |                          |      |           |       |                           |      |           |      |           |        |           |       | 10.21     |       | 9.55      |       |                       |              |
|                            | $\beta$                  | p    | $\beta$   | p     | $\beta$                   | p    | $\beta$   | p    | $\beta$   | p      | $\beta$   | p     | $\beta$   | p     | $\beta$   | p     | —                     | —            |
| <b>SASH Language</b>       | —                        | —    | —         | —     | 0.2686                    | 0.32 | 0.7213    | 0.04 | —         | —      | —         | —     | -0.3026   | 0.003 | 0.1065    | 0.60  | —                     | —            |
| <b>SASH Social</b>         | —                        | —    | —         | —     | —                         | —    | —         | —    | —         | —      | —         | —     | -0.5410   | 0.008 | 0.4641    | 0.27  | —                     | —            |

<sup>‡</sup>Only statistically significant interactions were analyzed in adjusted models; excludes cases where income is missing.  
 Multivariable models were adjusted for Age, Sex, Diabetes, Hypertension, Obesity, Physical Activity, Tobacco, and Alcohol Use.  
 LVMI = Left ventricular mass index; LAVI = Left atrial volume index  
 e' = Mitral annular early diastolic velocity; E/e' = Ratio between early mitral inflow velocity and mitral annular early diastolic velocity

STROBE Statement—Checklist of items that should be included in reports of *Observational studies*  
in epidemiology

|                              | Item No | Recommendation                                                                                                                                                                                               | Page # |
|------------------------------|---------|--------------------------------------------------------------------------------------------------------------------------------------------------------------------------------------------------------------|--------|
| <b>Title and abstract</b>    | 1       | (a) Indicate the study's design with a commonly used term in the title or the abstract                                                                                                                       | 1&     |
|                              |         | (b) Provide in the abstract an informative and balanced summary of what was done and what was found                                                                                                          | 3&4    |
| <b>Introduction</b>          |         |                                                                                                                                                                                                              |        |
| Background/rationale         | 2       | Explain the scientific background and rationale for the investigation being reported                                                                                                                         | 4      |
| Objectives                   | 3       | State specific objectives, including any pre-specified hypotheses                                                                                                                                            | 4&5    |
| <b>Methods</b>               |         |                                                                                                                                                                                                              |        |
| Study design                 | 4       | Present key elements of study design early in the paper                                                                                                                                                      | 5      |
| Setting                      | 5       | Describe the setting, locations, and relevant dates, including periods of recruitment, exposure, follow-up, and data collection                                                                              | 5      |
| Participants                 | 6       | (a) Give the eligibility criteria, and the sources and methods of selection of participants. Describe methods of follow-up                                                                                   | 5      |
|                              |         | (b) For matched studies, give matching criteria and number of exposed and unexposed                                                                                                                          |        |
| Variables                    | 7       | Clearly define all outcomes, exposures, predictors, potential confounders, and effect modifiers. Give diagnostic criteria, if applicable                                                                     | 6&7    |
| Data sources/<br>measurement | 8*      | For each variable of interest, give sources of data and details of methods of assessment (measurement). Describe comparability of assessment methods if there is more than one group                         | 6&7    |
| Bias                         | 9       | Describe any efforts to address potential sources of bias                                                                                                                                                    | 8      |
| Study size                   | 10      | Explain how the study size was arrived at                                                                                                                                                                    | 5&9    |
| Quantitative variables       | 11      | Explain how quantitative variables were handled in the analyses. If applicable, describe which groupings were chosen and why                                                                                 | 6&7    |
| Statistical methods          | 12      | (a) Describe all statistical methods, including those used to control for confounding                                                                                                                        | 8&9    |
|                              |         | (b) Describe any methods used to examine subgroups and interactions                                                                                                                                          |        |
|                              |         | (c) Explain how missing data were addressed                                                                                                                                                                  |        |
|                              |         | (d) If applicable, explain how loss to follow-up was addressed                                                                                                                                               |        |
|                              |         | (e) Describe any sensitivity analyses                                                                                                                                                                        |        |
| <b>Results</b>               |         |                                                                                                                                                                                                              |        |
| Participants                 | 13*     | (a) Report numbers of individuals at each stage of study—eg numbers potentially eligible, examined for eligibility, confirmed eligible, included in the study, completing follow-up, and analysed            | 9      |
|                              |         | (b) Give reasons for non-participation at each stage                                                                                                                                                         |        |
|                              |         | (c) Consider use of a flow diagram                                                                                                                                                                           |        |
| Descriptive data             | 14*     | (a) Give characteristics of study participants (eg demographic, clinical, social) and information on exposures and potential confounders                                                                     | 9      |
|                              |         | (b) Indicate number of participants with missing data for each variable of interest                                                                                                                          |        |
|                              |         | (c) Summarise follow-up time (eg, average and total amount)                                                                                                                                                  |        |
| Outcome data                 | 15*     | Report numbers of outcome events or summary measures over time                                                                                                                                               | 10&11  |
| Main results                 | 16      | (a) Give unadjusted estimates and, if applicable, confounder-adjusted estimates and their precision (eg, 95% confidence interval). Make clear which confounders were adjusted for and why they were included | 10&11  |
|                              |         | (b) Report category boundaries when continuous variables were categorized                                                                                                                                    |        |
|                              |         | (c) If relevant, consider translating estimates of relative risk into absolute risk for a                                                                                                                    |        |

|    |                          |                        |                                                                                                                                                                            |
|----|--------------------------|------------------------|----------------------------------------------------------------------------------------------------------------------------------------------------------------------------|
| 1  |                          | meaningful time period |                                                                                                                                                                            |
| 2  | Other analyses           | 17                     | Report other analyses done—eg analyses of subgroups and interactions, and sensitivity analyses                                                                             |
| 3  |                          |                        | 11                                                                                                                                                                         |
| 4  |                          |                        |                                                                                                                                                                            |
| 5  | <b>Discussion</b>        |                        |                                                                                                                                                                            |
| 6  | Key results              | 18                     | Summarise key results with reference to study objectives                                                                                                                   |
| 7  |                          |                        | 12&13                                                                                                                                                                      |
| 8  | Limitations              | 19                     | Discuss limitations of the study, taking into account sources of potential bias or imprecision. Discuss both direction and magnitude of any potential bias                 |
| 9  |                          |                        | 16                                                                                                                                                                         |
| 10 | Interpretation           | 20                     | Give a cautious overall interpretation of results considering objectives, limitations, multiplicity of analyses, results from similar studies, and other relevant evidence |
| 11 |                          |                        | 14&15                                                                                                                                                                      |
| 12 | Generalizability         | 21                     | Discuss the generalizability (external validity) of the study results                                                                                                      |
| 13 |                          |                        | 16                                                                                                                                                                         |
| 14 | <b>Other information</b> |                        |                                                                                                                                                                            |
| 15 | Funding                  | 22                     | Give the source of funding and the role of the funders for the present study and, if applicable, for the original study on which the present article is based              |
| 16 |                          |                        | 1                                                                                                                                                                          |
| 17 |                          |                        |                                                                                                                                                                            |

\*Give information separately for exposed and unexposed groups.

**Note:** An Explanation and Elaboration article discusses each checklist item and gives methodological background and published examples of transparent reporting. The STROBE checklist is best used in conjunction with this article (freely available on the Web sites of PLoS Medicine at <http://www.plosmedicine.org/>, Annals of Internal Medicine at <http://www.annals.org/>, and Epidemiology at <http://www.epidem.com/>). Information on the STROBE Initiative is available at <http://www.strobe-statement.org>.

# BMJ Open

## Association of Acculturation with Cardiac Structure and Function among Hispanic/Latinos: a cross-sectional analysis of the Echocardiographic Study of Latinos

|                                 |                                                                                                                                                                                                                                                                                                                                                                                                                                                                                                                                                                                                                                                                                                                                                                                                                                                                                   |
|---------------------------------|-----------------------------------------------------------------------------------------------------------------------------------------------------------------------------------------------------------------------------------------------------------------------------------------------------------------------------------------------------------------------------------------------------------------------------------------------------------------------------------------------------------------------------------------------------------------------------------------------------------------------------------------------------------------------------------------------------------------------------------------------------------------------------------------------------------------------------------------------------------------------------------|
| Journal:                        | <i>BMJ Open</i>                                                                                                                                                                                                                                                                                                                                                                                                                                                                                                                                                                                                                                                                                                                                                                                                                                                                   |
| Manuscript ID                   | bmjopen-2018-028729.R2                                                                                                                                                                                                                                                                                                                                                                                                                                                                                                                                                                                                                                                                                                                                                                                                                                                            |
| Article Type:                   | Original research                                                                                                                                                                                                                                                                                                                                                                                                                                                                                                                                                                                                                                                                                                                                                                                                                                                                 |
| Date Submitted by the Author:   | 07-Oct-2019                                                                                                                                                                                                                                                                                                                                                                                                                                                                                                                                                                                                                                                                                                                                                                                                                                                                       |
| Complete List of Authors:       | Lopez, Lenny; San Francisco VA Medical Center, Hospital Medicine<br>Swett, Katrina; Yeshiva University Albert Einstein College of Medicine, Medicine / Cardiology<br>Rodriguez, Fatima ; Stanford University School of Medicine, Medicine / Cardiology<br>Kizer, Jorge R.; San Francisco VA Medical Center, Medicine / Cardiology<br>Penedo, Frank; Northwestern University, Medical Social Sciences.<br>Gallo, Linda; San Diego State University<br>Allison, Matthew; University of California San Diego, Medicine<br>Arguelles, William; Baptist Health South Florida<br>Gonzalez, Franklyn; University of North Carolina at Chapel Hill, Biostatistics<br>Kaplan, Robert C.; Yeshiva University Albert Einstein College of Medicine, Epidemiology and Population Health<br>Rodriguez, Carlos J.; Yeshiva University Albert Einstein College of Medicine, Medicine / Cardiology |
| <b>Primary Subject Heading</b>: | Epidemiology                                                                                                                                                                                                                                                                                                                                                                                                                                                                                                                                                                                                                                                                                                                                                                                                                                                                      |
| Secondary Subject Heading:      | Cardiovascular medicine                                                                                                                                                                                                                                                                                                                                                                                                                                                                                                                                                                                                                                                                                                                                                                                                                                                           |
| Keywords:                       | Heart failure < CARDIOLOGY, SOCIAL MEDICINE, EPIDEMIOLOGY, Echocardiography < CARDIOLOGY                                                                                                                                                                                                                                                                                                                                                                                                                                                                                                                                                                                                                                                                                                                                                                                          |
|                                 |                                                                                                                                                                                                                                                                                                                                                                                                                                                                                                                                                                                                                                                                                                                                                                                                                                                                                   |

SCHOLARONE™  
Manuscripts

1  
2  
3 **Association of Acculturation with Cardiac Structure and Function among**  
4 **Hispanic/Latinos: a cross-sectional analysis of the Echocardiographic Study of Latinos**  
5  
6

7 **Short Title:** Acculturation and Cardiac Structure and Function  
8  
9

10  
11 **Address for correspondence**

12 Lenny López, MD, MPH, MDiv. Division of Hospital Medicine, University of California  
13 San Francisco – San Francisco VA Medical Center. 4150 Clement St, San Francisco CA,  
14 94121. (lenny.lopez@ucsf.edu). Phone: 617-270-6600.  
15  
16

17 **Contributing authors:**

- 18 1. Lenny López, MD, MPH, MDiv. Division of Hospital Medicine, University of  
19 California San Francisco – San Francisco VA Medical Center, San Francisco, CA.  
20 (lenny.lopez@ucsf.edu).
- 21 2. Katrina Swett, MS. Department of Epidemiology & Population Health, Albert Einstein  
22 College of Medicine, Bronx, NY. (katrina.swett@einstein.yu.edu).
- 23 3. Fátima Rodríguez, MD, MPH. Division of Cardiovascular Medicine, Stanford University,  
24 Palo Alto, CA. (frodrigu@stanford.edu).
- 25 4. Jorge R. Kizer, MD. Division of Cardiology, San Francisco VA Medical Center, San  
26 Francisco, CA. (jorge.kizer@ucsf.edu).
- 27 5. Frank J. Penedo, PhD. Department of Medical Social Sciences, Feinberg School of  
28 Medicine, Northwestern University, Chicago, Illinois. (frank.penedo@northwestern.edu).
- 29 6. Linda C. Gallo, PhD. Department of Psychology, San Diego State University, San Diego,  
30 CA. (lgallo@mail.sdsu.edu).
- 31 7. Matthew A. Allison, MD, MPH, FAHA. Division of Preventive Medicine, University  
32 of California San Diego, San Diego, CA. (mallison@ucsd.edu).
- 33 8. William Arguelles, PhD. Center for Research and Grants, Baptist Health South  
34 Florida, Miami, FL. (warguelles@psy.miami.edu).
- 35 9. Franklyn Gonzalez, MS. Department of Biostatistics, University of North  
36 Carolina, Chapel Hill, NC. (fgonzale@email.unc.edu).
- 37 10. Robert Kaplan, PhD. Department of Epidemiology & Population Health, Albert Einstein  
38 College of Medicine, Bronx, NY. (robert.kaplan@einstein.yu.edu).
- 39 11. Carlos J. Rodríguez, MD, MPH. Departments of Cardiovascular Medicine, Epidemiology  
40 and Population Health, Albert Einstein College of Medicine, Bronx, NY.  
41 (carlos.rodriguez@einstein.yu.edu).
- 42  
43  
44  
45  
46  
47  
48

49 Manuscript Word Count: 3,483

50 Number of Tables: 3

51 Number of Figures: 2

52 Number of Supplemental Tables: 2  
53  
54  
55  
56  
57  
58  
59  
60



## Abstract

**Objective:** Hispanics/Latinos, the largest immigrant population in the United States, undergo the process of acculturation and have a large burden of heart failure risk. Few studies have examined the association of acculturation on cardiac structure and function. **Design:** cross-sectional

**Setting:** the Echocardiographic Study of Latinos

**Participants:** 1,818 Hispanic adult participants with baseline echocardiographic assessment and acculturation measured by the Short Acculturation Scale, nativity, immigration age, length of US residence, generational status and language.

**Primary and secondary outcome measures:** Echocardiographic assessment of left atrial volume index (LAVI), left ventricular mass index (LVMI), early diastolic transmitral inflow and mitral annular velocities.

**Results:** The study population was predominantly Spanish-speaking and foreign-born with mean US residence of 22.7 years, mean age of 56.4 years; 50% had hypertension, 28% had diabetes, and 44% had a BMI  $>30\text{kg/m}^2$ . Multivariable analyses demonstrated higher LAVI with increasing years of US residence. Foreign-born and first generation participants had higher E/e' but lower LAVI and e' velocities compared to the second generation. Higher acculturation and income  $>\$20\text{K}$  were associated with higher LVMI, LAVI, and E/e', but lower e' velocities. Preferential Spanish-speakers with an income  $<\$20\text{K}$  had a higher E/e'.

**Conclusions:** Acculturation was associated with abnormal cardiac structure and function, with some effect modification seen according to socioeconomic status.

**Abstract Word Count:** 207

**Keywords:** Acculturation, Echocardiogram, Hispanics/Latinos, Socioeconomic Status

### Strengths and limitations of this study

- A population-based cohort study design focusing on the predominantly immigrant Hispanic/Latino population in the United States (US).
- A detailed comprehensive echocardiographic examination was performed to determine cardiac structure and function in every participant.
- By including several acculturation measures (nativity, years of US residence/age at migration, SASH subscales, language preference and generational status) our goal was to be comprehensive and to capture several aspects of acculturation.
- We are specifically referring to acculturation into the US culture, which may not be generalizable to acculturation in other settings.

1  
2  
3 Cardiovascular disease (CVD) and heart failure (HF) risk factor burden is higher among  
4  
5 Hispanic/Latinos in the United States (US)<sup>1,2</sup> compared to non-Hispanic whites leading  
6  
7 to abnormalities of cardiac structure and function<sup>3</sup> which have been associated with  
8  
9  
10 incident clinical HF,<sup>4</sup> incident CVD and increased mortality.<sup>5-8</sup>  
11  
12

13  
14 With respect to HF, Hispanics/Latinos have a higher incidence compared to non-Hispanic whites and  
15  
16 Hispanics/Latinos who present with HF are younger with more co-morbidities and a lower left  
17  
18 ventricular (LV) ejection fraction (EF) compared to non-Hispanic whites.<sup>2,9-11</sup> Beyond traditional  
19  
20 HF risk factors (hypertension, diabetes and obesity), sociocultural factors such as acculturation, may  
21  
22 contribute to HF risk among Hispanic/Latinos (**Figure 1/Conceptual Model**)<sup>2</sup> but the impact of  
23  
24 acculturation on cardiac structure and function has not been examined. The fact that  
25  
26 Hispanics/Latinos are the largest immigrant population in the US accentuates the public health  
27  
28 impact of studying the influence of acculturation on cardiac parameters.  
29  
30  
31  
32  
33  
34

35  
36 Acculturation is a multidimensional process whereby immigrants adapt to the beliefs and  
37  
38 practices of a host culture.<sup>12</sup> This can pose a chronic daily stressor for many immigrants that  
39  
40 can affect physical health outcomes. Higher acculturation levels have been associated with  
41  
42 increased psychosocial stress, deleterious CV health behaviors and a higher CV risk factor  
43  
44 burden.<sup>13-16</sup> In our mechanistic framework, the acculturative process leads to increase stress  
45  
46 and worse health behaviors which separately or jointly alter cardiac structure and function to  
47  
48 increase HF risk. Few studies<sup>17,18</sup> have examined acculturation in relation to HF risk  
49  
50 specifically focusing on cardiac structure and function as key intermediary outcomes.  
51  
52  
53  
54  
55  
56  
57  
58  
59  
60

1  
2  
3 We primarily sought to test whether acculturation, an important sociocultural variable with  
4 biopsychosocial implications, is associated with cardiac structure and function among  
5 Hispanics/Latinos. Studies of acculturation and CVD often overlook socioeconomic status (SES)  
6  
7 as an effect modifier. Because SES is associated with cardiac parameters<sup>19</sup> and modifies the  
8  
9 association between acculturation and other health-related variables,<sup>20</sup> secondarily, we sought to  
10  
11 test whether our primary associations are moderated by SES.  
12  
13  
14  
15  
16  
17  
18

## 19 **Methods**

### 20 **Cohort Description**

21  
22 The Hispanic Community Health Study/Study of Latinos (HCHS/SOL) is a population-based  
23 study of 16,415 Hispanic/Latinos from randomly selected households at four US field centers  
24  
25 (Bronx, NY; Chicago, IL; Miami, FL; and San Diego, CA).<sup>21</sup> Probability sampling was used to  
26  
27 ensure broad representation of the target population and to minimize the sources of bias that may  
28  
29 otherwise enter into the cohort selection and recruitment process. Participants were between 18  
30  
31 and 74 years of age, and self-identified as Cuban, Central American, Dominican, Mexican,  
32  
33 Puerto Rican, or South American Hispanic/Latino heritage. The ECHO-SOL ancillary study was  
34  
35 designed to provide echocardiographic parameters characterizing cardiac structure and function  
36  
37 in a representative HCHS/SOL baseline subsample of 1,818 participants  $\geq 45$  years old.<sup>3,22</sup>  
38  
39  
40  
41  
42  
43  
44  
45 Institutional Review Board approval was obtained at each study site (Albert Einstein College of  
46  
47 Medicine, Bronx, NY; Northwestern University, Chicago, Illinois; University of Miami, Miami,  
48  
49 FL; University of California, San Diego, San Diego, CA; Wake Forest School of Medicine,  
50  
51 Winston-Salem, NC) and all ECHO-SOL participants gave informed consent prior to  
52  
53 participating in the study.  
54  
55  
56  
57  
58  
59  
60

## Patient and public involvement

No patients were involved in the development of the research question, design, recruitment or implementation of this research cohort study. Results were disseminated to study participants in the form of a Data Book and periodic newsletters. See [www.saludsol.net](http://www.saludsol.net).

## In-Person Examination

The examination protocol for the parent HCHS/SOL has been previously published.<sup>13</sup> Obesity was defined as a body mass index (BMI)  $\geq 30.0$  kg/m<sup>2</sup>. Seated resting blood pressures were measured in triplicate and the average of the 2<sup>nd</sup> and 3<sup>rd</sup> readings was used for analysis. Type 2 diabetes was defined based on American Diabetes Association definition using one or more of the following criteria: 1) fasting serum glucose  $\geq 126$  mg/dl, 2) oral glucose tolerance test  $\geq 200$  mg/dl, 3) self-reported diabetes, 4) HbA1C  $\geq 6.5\%$ , or 5) taking anti-diabetic medication or insulin. Renal function was measured by estimated glomerular filtration rate (eGFR). Physical activity levels, categorized as low or medium/high, were assessed using the Global Physical Activity Questionnaire.<sup>23</sup> Self-report questionnaires assessed smoking status (no/ever/current), alcohol consumption (current/no), and insurance coverage (yes/no) and type (Private/Medicare/Medicaid). Educational level was defined as highest degree or level of school completed. Current household income while living in the US was dichotomized as  $< \$20,000$  and  $> \$20,000$ , given the low number of participants with incomes  $> \$40,000$ . Our secondary analysis focused on current income as a more relevant influencer of a participant's acculturative process, acting as a proxy for the ability to integrate and be exposed to mainstream US cultural contexts.

1  
2  
3 Marital status was categorized as either single, married, partnered, separated, divorced  
4  
5 or widowed.  
6  
7  
8  
9

### 10 **Echocardiographic Measurements**

11  
12 Trained sonographers performed transthoracic echocardiography examinations, including 2D  
13  
14 imaging, and spectral, color and tissue Doppler.<sup>22</sup> Echocardiographic measures of left and  
15  
16 right heart structure and function included:  
17  
18

- 19 1) LV mass index (LVMI) was determined according to guidelines,<sup>24</sup> by subtracting the LV  
20  
21 endocardial cavity volume from the LV epicardial volume and multiplying the resultant  
22  
23 myocardial volume by the myocardial density and indexing to body surface area.  
24  
25
- 26 2) LV systolic function and volumes. LVEF was derived from Volumetric Assessments using  
27  
28 the method of discs from apical 4- and 2-chamber long-axis views to measure end-diastolic  
29  
30 volume (EDV) and end-systolic volume (ESV). LVEF was calculated:  $(EDV - ESV)/EDV$ .  
31  
32
- 33 3) LV diastolic function was defined per guidelines,<sup>25</sup> using three echocardiographic  
34  
35 parameters: 1) peak early (E) and late (A) diastolic transmitral inflow velocities; 2) early  
36  
37 diastolic (e') annular velocities (the average of septal and lateral annular velocities were  
38  
39 used); 3) left atrial volume indexed (LAVI) to body surface area.  
40  
41
- 42 4) Relative Wall Thickness (RWT) predicated LV geometry and was defined as:  $[(\text{posterior}$   
43  
44  $\text{LV wall thickness} \times 2) / \text{LV diastolic diameter}]$ . Higher RWT values are associated with a  
45  
46 smaller LV cavity size and lower RWT values are associated with higher LV cavity sizes.  
47  
48  
49  
50

### 51 **Acculturation Measures**

52  
53  
54  
55  
56  
57  
58  
59  
60

1  
2  
3 Acculturation was defined using several validated measures. First, nativity was classified as  
4 either born in or outside the US mainland (50 states). Those born in Puerto Rico (PR) or other  
5 US territories were classified as born outside of the US mainland to reflect their migration and  
6 acculturation experiences. Second, foreign-born individuals were asked the number of years  
7 lived in the US and categorized as <5, 5-10, 11-20, >20 years. We used the Short Acculturation  
8 Scale for Hispanics (SASH),<sup>26</sup> which has two subscales based on five-point Likert type  
9 questions: 1. the SASH language subscale (items related to language use [e.g., language they  
10 speak, think]); and 2. the SASH social relations subscale (items related to media preference and  
11 social affiliations [e.g., language of media programs watched; ethnicity of close friends]). The  
12 SASH has yielded reliabilities ( $\alpha$ ) of 0.92 (overall), 0.90 (language use), 0.86 (media preference),  
13 and 0.78 (ethnic and social relations). These subscales were analyzed separately with higher  
14 scores representing higher degrees of acculturation. Fifth, language preference was further  
15 characterized as English vs. Spanish based on language of interview. Finally, data on  
16 generational status (first- and second-generation Hispanics are US-born and distinct from their  
17 foreign-born immigrant parents) was collected as well as age at the time of migration to the US.

### 39 **Statistical Analyses**

40  
41 Sampling weights were used to obtain weighted frequencies of descriptive variables and  
42 population estimates in the ECHO-SOL target population. We used means  $\pm$  standard errors  
43 (SEs) for continuous variables and proportions for categorical variables. LVMI, RWT, LVEF,  
44 e' annular velocities and LAVI were analyzed as continuous variables. LV diastolic dysfunction  
45 (LVDD) was analyzed as a binary variable (present vs. absent).<sup>3</sup> Acculturation variables were  
46 categorical (foreign- vs. US-born; 1<sup>st</sup> generation vs. 2<sup>nd</sup>; Spanish language preference vs.  
47  
48  
49  
50  
51  
52  
53  
54  
55  
56  
57  
58  
59  
60

English), ordinal (<5, 5-10, 11-20, and >20 years in the US) and continuous measures (age at immigration and SASH subscales). Weighted means and linear regression analysis was utilized for continuous variables whereas weighted frequencies and Rao-Scott Chi-Square was utilized for the categorical/ordinal variables. Means were compared across categorical acculturation variables using regression analysis for each dependent variable measure of cardiac structure (LVMI, RWT, LAVI) and function (LVEF,  $e'$ ,  $E/e'$ ). Only associations that were statistically significant in unadjusted analyses were further explored in multivariable analysis. Unadjusted and multivariable linear and logistic regression analyses were determined by our continuous and categorical dependent variable, respectively, utilizing sequential modeling for age and sex followed by models including clinical covariates (diabetes, hypertension, and obesity), and behavioral characteristics (physical activity, tobacco use, and alcohol use). For years in the US, we compared >20 years to <5 years as well as an overall comparison across each category of years in the US. We performed a couple of sensitivity analyses (data not shown): 1. comparing acculturative characteristics of individuals born in the island of PR vs. other foreign-born Hispanics; 2. comparing acculturation and health care utilization using HCHS/SOL questions regarding difficulty obtaining health care in the past year and number of physician visits in the past year. We tested effect moderation with income through the use of interaction terms in models followed by stratified analyses by income for statistically significant interactions at the  $p < 0.01$  level. All other statistical tests were 2-sided at a significance level of 0.05. All reported values were weighted to account for HCHS/SOL sampling probability design, stratification, clustering and nonresponse and to make estimates applicable to the HCHS/SOL target population. All analyses were performed utilizing SAS 9.3 (SAS Institute, Cary, NC) PROC SURVEY procedures.



## **Results**

Fifty-seven percent of the study population were women; almost half (46%) had a reported annual income under \$20K; over half were married and most had some type of health insurance (mostly Medicaid and/or Medicare). Hypertension and diabetes were prevalent in half and almost one-third of the study population respectively. Most of the study population was foreign-born, only 14% preferred English, almost half (49%) had been in the US >20 years with a mean age of migration of 34 years of age, signifying that the majority came to the US as adults (**Table 1**). Mean values of echocardiographic variables (LAVI, RWT, LVMI, LVEF) were all within normal limits for this study population. However, mean e' annular velocities and E/e' ratio were borderline abnormal. Some degree of diastolic dysfunction was seen in over half (52%) of the study population but this has been previously described.<sup>3</sup>

**Table S1** shows unadjusted relationships between acculturation measures and echocardiographic characteristics. There were statistically significantly higher mean LAVI values across categories of length of time spent in the US whereas RWT appeared to have a U-shaped association. A statistically significantly lower annular relaxation velocity and higher E/e' ratio was seen among the foreign-born compared to US-born and among those 1<sup>st</sup> generation compared to 2<sup>nd</sup> generation. Greater acculturation, as measured by higher SASH language scale scores, was associated with greater LAVI. Younger age of migration to US was associated with increased RWT and LAVI.

1  
2  
3 Adjusted analyses (**Table 2**) demonstrated greater time spent in the US is significantly associated  
4 with increased RWT and LAVI. A statistically significantly higher E/e' ratio was seen among the  
5 foreign-born participants. Those 1<sup>st</sup> generation had lower LAVI, lower e' annular velocities and  
6 higher E/e' ratios compared to 2<sup>nd</sup> generation. Higher SASH language scale scores and younger  
7 age of migration to US were both associated with increased LAVI. These associations persisted  
8 in sequential models adjusted for clinical factors and behavioral factors both separately and  
9 together. Although greater odds of LVDD was seen in unadjusted associations with nativity,  
10 generational status, SASH language, and age of immigration (**Table 3**), these associations did  
11 not persist on adjusted analysis.  
12  
13  
14  
15  
16  
17  
18  
19  
20  
21  
22  
23  
24  
25

26 Significant interactions ( $p < 0.01$ ) were found between our main exposure (acculturation) and  
27 income on the effect of cardiac structure and function. Among those whose annual income is  
28  $> \$20K$ , a greater number of years in the US was associated with higher LVMI, lower e' annular  
29 velocities, and a higher E/e' ratio compared to those making  $< \$20K$  annually. Generational status  
30 was associated with increased LAVI only among those making  $> \$20K$  annually. However, being  
31 a preferential Spanish-speaker carried a statistically significant higher E/e' ratio only among  
32 those making  $< \$20K$  annually. (**Table S2**).  
33  
34  
35  
36  
37  
38  
39  
40  
41  
42  
43

44 Of foreign-born Hispanics, 24% were born in the US Commonwealth of PR, none in the US Virgin  
45 Islands. Spanish language preference was less among Hispanics born in PR compared to other  
46 foreign-born Hispanics. PR-born Hispanics scored higher on the SASH language scale and social  
47 interaction scale indicating higher acculturation levels compared to other foreign-born Hispanics.  
48  
49  
50  
51  
52  
53  
54 However, the level of Spanish language preference and SASH scores was still lower  
55  
56  
57  
58  
59  
60

1  
2  
3 among PR-born Hispanics compared to US born Hispanics. With regard to acculturation and  
4 health care utilization, being foreign-born, having less years in the US and not having health  
5 insurance were all significantly associated with difficulty obtaining health care in the past  
6 year. Foreign-born individuals had less physician visits over the past year compared to US  
7 born. The relation between years in the US and physician visits was complex, non-linear and  
8 mirrored an opposite pattern with income. **(Figure 2)** Having health insurance coverage was  
9 significantly associated with more physician visits over the past year.

## 10 11 12 **Discussion**

13  
14  
15  
16  
17  
18  
19  
20  
21  
22  
23  
24  
25  
26  
27  
28  
29  
30  
31  
32  
33  
34  
35  
36  
37  
38  
39  
40  
41  
42  
43  
44  
45  
46  
47  
48  
49  
50  
51  
52  
53  
54  
55  
56  
57  
58  
59  
60  
Hispanics/Latinos in the US represent a relatively young demographic such that the future public  
health burden of HF as this population ages is potentially underestimated.<sup>27</sup> The Hispanic  
population >65 years of age is expected to grow 328% between 2000 and 2030, making  
Hispanics the fastest growing aging population in the US.<sup>28</sup> As the Hispanic population ages,  
and HF risk factors and cardiac abnormalities progress, it is likely that an epidemic of HF will  
emerge in this population.

Acculturation is a complex but important phenomenon among immigrant populations that  
encompasses multiple domains: (1) integration - maintaining the original parent culture while  
adopting the host culture; (2) assimilation - rejecting the parent culture and entirely adopting the  
host culture; (3) separation - rejecting the host culture and keeping the parent culture; and (4)  
marginalization - not identifying with either the original culture or the host culture.<sup>29</sup> The  
acculturation process can be positive, improved life opportunities in the host culture compared to  
the parent culture, and/or it could be negative due to the challenging nature of change and  
adaptation to new cultural and social expectations. Prior studies show strong negative effects of

1  
2  
3 greater acculturation on worsening CV risk factors but positive effects on use of preventive  
4 health services.<sup>30-32</sup> HCHS/SOL has demonstrated significant heterogeneity in CVD risk factor  
5 burden among Hispanics/Latinos by country of origin and acculturation measures.<sup>13</sup> Our  
6  
7  
8 analysis of validated acculturation measures provides several important contributions. First,  
9  
10  
11 higher levels of acculturation were associated with abnormal cardiac structure and function in  
12  
13 our predominately foreign-born, Spanish-speaking adult population. Second, different measures  
14  
15 of acculturation (each capturing different aspects of the acculturative process) had varying  
16  
17 associations with different measures of cardiac structure and function (each considered its own  
18  
19 specific outcome). Finally, income significantly moderated these associations. Our findings  
20  
21 support the premise that exposure to the social and environmental stress of acculturation may  
22  
23 promote unhealthy behaviors<sup>33</sup> and/or act via undefined pathways of physiologic/psychosocial  
24  
25 stress to contribute to the increased HF risk seen among Hispanics/Latinos.<sup>27</sup> **(Figure 1)**  
26  
27  
28 Additionally, our sensitivity analysis suggests that living in the island of PR still allows for  
29  
30 maintenance of a culture that is distinct from the US culture. Further elucidating the complexities  
31  
32 of acculturative factors influencing HF risk in immigrant populations is warranted.  
33  
34  
35

36  
37  
38 Although to our knowledge, there is no existing literature on the association between acculturation  
39  
40 and HF risk, our study found several measures of acculturation (increasing years of US residence,  
41  
42 English preference, and younger age at immigration) were associated with abnormal cardiac  
43  
44 structure and function (increased LAVI, increased LVMI, increased RWT, lower annular e'  
45  
46 relaxation velocity and higher E/e' ratio). Although the magnitudes of our observed associations are  
47  
48 modest, limiting the short-term clinical relevance of these findings, the long-term public health  
49  
50 importance is likely high, given the potential for progression of cardiac  
51  
52  
53  
54  
55  
56  
57  
58  
59  
60

1  
2  
3 damage with the accumulation of acculturative stress during the life course. This is particularly  
4 salient given the fact that abnormal cardiac structure and function is an independent risk factor  
5 for the future development of clinical HF. An increased E/e' ratio, LAVI, and LVMI are markers  
6 of chronically-elevated filling pressures associated with impaired cardiac relaxation and HF with  
7 preserved ejection fraction.<sup>34,35</sup> The presence of abnormal cardiac structure and function has  
8  
9 been associated with increased HF hospitalizations, cardiovascular death and improved CV risk  
10 prediction.<sup>35-37</sup> Importantly, these cardiac abnormalities are additive, with worse outcomes seen  
11  
12 in individuals with more than one alteration.<sup>35</sup> In order to identify preclinical CV disease,  
13  
14 abnormalities in cardiac structure and function determined by echocardiography are important  
15 intermediary measures, many of which have been associated with incident CVD, incident clinical  
16 HF and increased mortality.<sup>5-7</sup> Given the size of the US Hispanic/Latino population and high  
17  
18 burden of acculturation (82% were foreign-born), echocardiography might help to identify a  
19  
20 particularly high risk subset of participants.  
21  
22  
23  
24  
25  
26  
27  
28  
29  
30  
31  
32  
33  
34

35 LVM is associated with CVD, sudden cardiac death, and all-cause mortality.<sup>34</sup> Among foreign-  
36 born Hispanics/Latinos, we found increased LVMI with increasing years in the US. Our study  
37 is consistent with prior studies showing a high prevalence of LVM among Hispanics/Latinos  
38 especially among low income Hispanics/Latinos with increasing years of US residence.<sup>18,38,39</sup>  
39  
40 Prior studies have demonstrated that adjustment for socioeconomic factors did not fully account  
41 for the presence of increased LVMI among Hispanics/Latinos<sup>40</sup> possibly due to the residual  
42 effect of acculturation. Changes in LVM can occur without overt clinical hypertension in  
43  
44 adrenergic states, such as chronic stress<sup>41</sup> with psychosocial factors such as perceived  
45  
46 discrimination and low social support.<sup>42,43</sup> Acculturative stress is the psychological impact of  
47  
48  
49  
50  
51  
52  
53  
54  
55  
56  
57  
58  
59  
60

1  
2  
3 navigating the acculturation process and making decisions on retaining one's native culture while  
4 adapting to a new cultural context. Acculturation as a chronic stressor may negatively affect  
5 mental and physical health through unhealthy behaviors,<sup>31,33</sup> increased anxiety, depression,  
6  
7 perceived discrimination and lack of social support<sup>15,33,44</sup> all of which may impact adrenergic  
8  
9 biomarkers leading to cardiac structural and functional abnormalities and increased HF risk  
10  
11 observed in our study. This is an area of research to further explore in future studies.  
12  
13  
14  
15  
16  
17  
18

19 The statistically significant interaction between acculturation and SES on cardiac measures may  
20 shed light on the "Hispanic paradox" which states that Hispanics/Latinos, a disproportionately  
21 low SES group, have lower overall mortality and cardiovascular mortality compared to non-  
22 Hispanic Whites.<sup>2</sup> Low SES is a composite chronic stressor encompassing multiple factors (e.g.,  
23 work, housing and financial strain). Longitudinal studies have shown an inverse association  
24 between SES level and adverse outcomes.<sup>42,45</sup> We hypothesized that less acculturation (more  
25 retention of the parent culture) may be protective of the adverse health consequences of low SES.  
26 In our study, those with higher SES (defined as annual incomes >\$20K) exhibited more  
27 deleterious effects of increasing acculturation on cardiac structural and functional measures. A  
28 prior study found the relationship between acculturation and health care utilization to be complex  
29 and moderated by SES.<sup>46</sup> Our exploratory analysis found that being foreign-born and having a  
30 higher income may make one less likely to utilize health care. A more extensive analysis on the  
31 complex nature of acculturation and health care utilization is beyond the scope of our paper but  
32 this area deserves further consideration in future studies. There may be more acculturative stress  
33 for higher-SES immigrants, perhaps through increased contact and interaction with the  
34 mainstream culture,<sup>47</sup> which may contribute to our findings. *Familismo* is a culture-specific  
35  
36  
37  
38  
39  
40  
41  
42  
43  
44  
45  
46  
47  
48  
49  
50  
51  
52  
53  
54  
55  
56  
57  
58  
59  
60

1  
2  
3 factor characterized by having strong bonds with nuclear and extended family resulting in a high  
4 level of perceived family support and is associated with indicators of improved health.<sup>48,49</sup>  
5  
6

7 Studies suggest that with increasing acculturation, *familismo* is eroded and dimensions of  
8  
9 *familismo* begin to increase psychosocial stress rather than alleviate it.<sup>49-51</sup>  
10  
11  
12

13  
14 Several limitations should be noted. Our study is cross-sectional and precludes the ability to  
15 assess the temporal sequence of the relationships and causal inference. However, our findings  
16 warrant replication and longitudinal follow up. Participants resided in one of four US cities,  
17 precluding generalizability to all Hispanic/Latinos in the US. While this study is one of the  
18 largest studies of acculturation with cardiac structure and function in any population, the sample  
19 size is relatively modest; thus, we were underpowered to perform stratified analyses by national  
20 origin in order to characterize the heterogeneity within Hispanic/Latinos. We are specifically  
21 referring to acculturation into the US culture, which may not be generalizable to acculturation in  
22 other settings. Finally, our study focuses on acculturation as a unique intra-ethnic phenomenon.  
23 By including several measures (nativity, years of US residence/age at migration, SASH  
24 subscales, language preference and generational status) our goal was to be comprehensive and  
25 to capture several aspects of acculturation. We believe acculturation cannot be captured by just  
26 one measure, as has been done in much of the prior literature; however, we agree that even our  
27 multivariable approach may not fully capture the complexities of all aspects and dimensions of  
28 the acculturative process.  
29  
30  
31  
32  
33  
34  
35  
36  
37  
38  
39  
40  
41  
42  
43  
44  
45  
46  
47  
48  
49  
50

## 51 **Conclusions**

52  
53  
54  
55  
56  
57  
58  
59  
60

1  
2  
3 In addition to traditional CV risk factors, acculturation may explain the disproportionate burden  
4 of HF risk among Hispanics/Latinos. Our study found significant deleterious associations  
5 between several acculturation measures with cardiac structural and functional parameters among  
6 a predominantly low-SES, foreign-born Hispanic/Latino population with increasing years of  
7 residence in the US. The acculturation experience is not unique to Hispanics/Latinos. Our study  
8 may help generate further research in other immigrant populations. Further elucidation of how  
9 acculturation impacts HF risk is warranted in order to possibly risk stratify a high-risk subgroup  
10 of Hispanics/Latinos and to inform the development of culturally appropriate interventions to  
11 amplify protective factors and to make the acculturative process less deleterious for  
12 Hispanics/Latinos and other immigrants.  
13  
14  
15  
16  
17  
18  
19  
20  
21  
22  
23  
24  
25  
26  
27  
28  
29  
30  
31  
32  
33  
34  
35  
36  
37  
38  
39  
40  
41  
42  
43  
44  
45  
46  
47  
48  
49  
50  
51  
52  
53  
54  
55  
56  
57  
58  
59  
60



1  
2  
3 **Acknowledgements:** The authors thank the staff and participants of HCHS/SOL and ECHO-  
4 SOL for their important contributions. Investigators website - <http://www.csc.unc.edu/hchs/>

5  
6  
7 **Contributors: Research Conception and design:** CJR, LL; **Collection and assembly of data:**  
8 CJR, MAA, RK, LCG; **Analysis and interpretation of the data:** CJR, LL, KS; **Drafting of the**  
9 **article:** CJR, LL, FR; **Critical revision of the article for important intellectual content:** CJR,  
10 LL, FR, JRK, FJP, LCG, WA, FG; **Obtaining of funding:** CJR, RK, MAA; **Statistical**  
11 **expertise:** KS, FG

12  
13  
14  
15 CJR and LL are responsible for the overall content as guarantors.

16  
17  
18 **Funding:** This study supported by contracts from the National Heart, Lung, and Blood Institute  
19 (NHLBI) to the University of North Carolina (N01-HC65233), University of Miami (N01-  
20 HC65234), Albert Einstein College of Medicine (N01-HC65235), Northwestern University  
21 (N01-HC65236), and San Diego State University (N01-HC65237). The following institutes  
22 contributed to HCHS/SOL: National Institute on Minority Health and Health Disparities,  
23 National Institute on Deafness and Other Communication Disorders, National Institute of Dental  
24 and Craniofacial Research, National Institute of Diabetes and Digestive and Kidney Diseases,  
25 National Institute of Neurological Disorders and Stroke, NIH Institution-Office of Dietary  
26 Supplements.

27  
28  
29  
30  
31  
32  
33 ECHO-SOL was supported by the National Heart, Lung, and Blood Institute  
34 (R01 HL104199, Epidemiologic Determinants of Cardiac Structure and Function among  
35 Hispanics: Carlos J. Rodriguez, MD, MPH Principal Investigator). Dr. Lenny L. López  
36 acknowledges the support of the Robert Wood Johnson Foundation Harold Amos Medical  
37 Faculty Development Program and NIDDK 1K23DK098280-01. No relationships with industry  
38 supported this work.

39  
40  
41  
42  
43  
44 **Competing interests:** None declared.

45  
46  
47 **Patient consent for publication:** Not required.

48  
49  
50  
51 **Ethics approval:** The Institutional Review Board at the Wake Forest School of Medicine and at  
52 each study site provided approval and oversight of all study materials and activities.

1  
2  
3  
4  
5  
6  
7  
8  
9  
10  
11  
12  
13  
14  
15  
16  
17  
18  
19  
20  
21  
22  
23  
24  
25  
26  
27  
28  
29  
30  
31  
32  
33  
34  
35  
36  
37  
38  
39  
40  
41  
42  
43  
44  
45  
46  
47  
48  
49  
50  
51  
52  
53  
54  
55  
56  
57  
58  
59  
60

**Data sharing statement:** The data are available according to NIH/HLBI data sharing policies through the NHLBI BioLINCC repository or through the HCHS/SOL Data Coordinating Center on request.

For peer review only

## REFERENCES

1. Mozaffarian D, Benjamin EJ, Go AS, et al. Heart Disease and Stroke Statistics—2015 Update: A Report From the American Heart Association. *Circulation* 2015;131:e29-e322.
2. Rodriguez CJ, Allison M, Daviglius ML, et al. Status of cardiovascular disease and stroke in Hispanics/Latinos in the United States: a science advisory from the American Heart Association. *Circulation* 2014;130:593-625.
3. Mehta H, Armstrong A, Swett K, et al. Burden of Systolic and Diastolic Left Ventricular Dysfunction Among Hispanics in the United States: Insights From the Echocardiographic Study of Latinos. *Circ Heart Fail* 2016;9.
4. Yancy CW, Jessup M, Bozkurt B, et al. 2013 ACCF/AHA guideline for the management of heart failure: a report of the American College of Cardiology Foundation/American Heart Association Task Force on Practice Guidelines. *J Am Coll Cardiol* 2013;62:e147-239.
5. Hobbs FD, Roalfe AK, Davis RC, Davies MK, Hare R, Midlands Research Practices C. Prognosis of all-cause heart failure and borderline left ventricular systolic dysfunction: 5 year mortality follow-up of the Echocardiographic Heart of England Screening Study (ECHOES). *Eur Heart J* 2007;28:1128-34.
6. Armstrong AC, Jacobs DR, Jr., Gidding SS, et al. Framingham score and LV mass predict events in young adults: CARDIA study. *Int J Cardiol* 2014;172:350-5.
7. Bombelli M, Facchetti R, Cuspidi C, et al. Prognostic significance of left atrial enlargement in a general population: results of the PAMELA study. *Hypertension* 2014;64:1205-11.
8. Echouffo-Tcheugui JB, Erqou S, Butler J, Yancy CW, Fonarow GC. Assessing the Risk of Progression From Asymptomatic Left Ventricular Dysfunction to Overt Heart Failure: A Systematic Overview and Meta-Analysis. *JACC Heart Fail* 2016;4:237-48.
9. Vivo RP, Krim SR, Cevik C, Witteles RM. Heart failure in Hispanics. *J Am Coll Cardiol* 2009;53:1167-75.
10. Vivo RP, Krim SR, Krim NR, et al. Care and outcomes of Hispanic patients admitted with heart failure with preserved or reduced ejection fraction: findings from get with the guidelines-heart failure. *Circ Heart Fail* 2012;5:167-75.

11. Bahrami H, Kronmal R, Bluemke DA, et al. Differences in the incidence of congestive heart failure by ethnicity: the multi-ethnic study of atherosclerosis. *Archives of internal medicine* 2008;168:2138-45.
12. Zambrana RE, Carter-Pokras O. Role of acculturation research in advancing science and practice in reducing health care disparities among Latinos. *Am J Public Health* 2010;100:18-23.
13. Daviglius ML, Talavera GA, Aviles-Santa ML, et al. Prevalence of major cardiovascular risk factors and cardiovascular diseases among Hispanic/Latino individuals of diverse backgrounds in the United States. *Jama* 2012;308:1775-84.
14. Ayala GX, Baquero B, Klinger S. A systematic review of the relationship between acculturation and diet among Latinos in the United States: implications for future research. *J Am Diet Assoc* 2008;108:1330-44.
15. Steptoe A, Kivimaki M. Stress and cardiovascular disease: an update on current knowledge. *Annu Rev Public Health* 2013;34:337-54.
16. Suh M, Barksdale DJ, Logan J. Relationships among acculturative stress, sleep, and nondipping blood pressure in Korean American women. *Clin Nurs Res* 2013;22:112-29.
17. Peterson PN, Campagna EJ, Maravi M, et al. Acculturation and outcomes among patients with heart failure. *Circ Heart Fail* 2012;5:160-6.
18. Effeo VS, Chen H, Moran A, et al. Acculturation is associated with left ventricular mass in a multiethnic sample: the Multi-Ethnic Study of Atherosclerosis. *BMC Cardiovasc Disord* 2015;15:161.
19. Rodriguez CJ, Sciacca RR, Diez-Roux AV, et al. Relation between socioeconomic status, race-ethnicity, and left ventricular mass: the Northern Manhattan study. *Hypertension* 2004;43:775-9.
20. Lee H, Cardinal BJ, Loprinzi PD. Effects of socioeconomic status and acculturation on accelerometer-measured moderate-to-vigorous physical activity among Mexican American adolescents: findings from NHANES 2003-2004. *J Phys Act Health* 2012;9:1155-62.
21. Lavange LM, Kalsbeek WD, Sorlie PD, et al. Sample design and cohort selection in the Hispanic Community Health Study/Study of Latinos. *Ann Epidemiol* 2010;20:642-9.
22. Rodriguez CJ, Dharod A, Allison MA, et al. Rationale and Design of the Echocardiographic Study of Hispanics/Latinos (ECHO-SOL). *Ethnicity & disease* 2015;25:180-6.

23. Cleland CL, Hunter RF, Kee F, Cupples ME, Sallis JF, Tully MA. Validity of the global physical activity questionnaire (GPAQ) in assessing levels and change in moderate-vigorous physical activity and sedentary behaviour. *BMC Public Health* 2014;14:1255.
24. Lang RM, Bierig M, Devereux RB, et al. Recommendations for chamber quantification: a report from the American Society of Echocardiography's Guidelines and Standards Committee and the Chamber Quantification Writing Group, developed in conjunction with the European Association of Echocardiography, a branch of the European Society of Cardiology. *Journal of the American Society of Echocardiography : official publication of the American Society of Echocardiography* 2005;18:1440-63.
25. Ommen SR, Nishimura RA, Appleton CP, et al. Clinical utility of Doppler echocardiography and tissue Doppler imaging in the estimation of left ventricular filling pressures - A comparative simultaneous Doppler-Catheterization study. *Circulation* 2000;102:1788-94.
26. Marin G, Sabogal F, Marin BV, Otero-Sabogal F, and Perez-Stable E. Development of a short acculturation scale for Hispanics. *Hispanic Journal of Behavioral Sciences* 1987;9:183-205.
27. Rangel MO, Kaplan R, Daviglius M, et al. Estimation of Incident Heart Failure Risk among US Hispanics/Latinos Using a Validated Echocardiographic Risk-Stratification Index: the Echocardiographic Study of Latinos. *J Card Fail* 2018;24:622-4.
28. US Census Bureau. 65+ in the United States:2005. *Current Population Reports* December 2005.
29. Schwartz SJ, Unger JB, Zamboanga BL, Szapocznik J. Rethinking the concept of acculturation: implications for theory and research. *Am Psychol* 2010;65:237-51.
30. Moran A, Diez Roux AV, Jackson SA, et al. Acculturation is associated with hypertension in a multiethnic sample. *Am J Hypertens* 2007;20:354-63.
31. Abraido-Lanza AF, Chao MT, Florez KR. Do healthy behaviors decline with greater acculturation? Implications for the Latino mortality paradox. *Soc Sci Med* 2005;61:1243-55.
32. DuBard CA, Gizlice Z. Language spoken and differences in health status, access to care, and receipt of preventive services among US Hispanics. *Am J Public Health* 2008;98:2021-8.
33. Lara M, Gamboa C, Kahramanian MI, Morales LS, Bautista DE. Acculturation and Latino health in the United States: a review of the literature and its sociopolitical context. *Annu Rev Public Health* 2005;26:367-97.

- 1  
2  
3 34. Abbate A, Arena R, Abouzaki N, et al. Heart failure with preserved ejection fraction:  
4 refocusing on diastole. *Int J Cardiol* 2015;179:430-40.
- 5  
6 35. Shah AM, Claggett B, Sweitzer NK, et al. Cardiac structure and function and prognosis  
7 in heart failure with preserved ejection fraction: findings from the echocardiographic study of the  
8 Treatment of Preserved Cardiac Function Heart Failure with an Aldosterone Antagonist  
9 (TOPCAT) Trial. *Circ Heart Fail* 2014;7:740-51.
- 10  
11 36. Zile MR, Gottdiener JS, Hetzel SJ, et al. Prevalence and significance of alterations in  
12 cardiac structure and function in patients with heart failure and a preserved ejection fraction.  
13 *Circulation* 2011;124:2491-501.
- 14  
15 37. Burke MA, Katz DH, Beussink L, et al. Prognostic importance of pathophysiologic  
16 markers in patients with heart failure and preserved ejection fraction. *Circ Heart Fail* 2014;7:288-  
17 99.
- 18  
19 38. Zabalgoitia M, Ur Rahman SN, Haley WE, et al. Impact of ethnicity on left ventricular  
20 mass and relative wall thickness in essential hypertension. *Am J Cardiol* 1998;81:412-7.
- 21  
22 39. Rodriguez CJ, Diez-Roux AV, Moran A, et al. Left ventricular mass and ventricular  
23 remodeling among Hispanic subgroups compared with non-Hispanic blacks and whites: MESA  
24 (Multi-ethnic Study of Atherosclerosis). *J Am Coll Cardiol* 2010;55:234-42.
- 25  
26 40. Rodriguez CJ, Lin F, Sacco RL, et al. Prognostic implications of left ventricular mass  
27 among Hispanics: the Northern Manhattan Study. *Hypertension* 2006;48:87-92.
- 28  
29 41. Julius S, Li Y, Brant D, Krause L, Buda AJ. Neurogenic pressor episodes fail to  
30 cause hypertension, but do induce cardiac hypertrophy. *Hypertension* 1989;13:422-9.
- 31  
32 42. Rozanski A, Blumenthal JA, Davidson KW, Saab PG, Kubzansky L. The epidemiology,  
33 pathophysiology, and management of psychosocial risk factors in cardiac practice: the  
34 emerging field of behavioral cardiology. *J Am Coll Cardiol* 2005;45:637-51.
- 35  
36 43. Rodriguez CJ, Elkind MS, Clemow L, et al. Association between social isolation and left  
37 ventricular mass. *Am J Med* 2011;124:164-70.
- 38  
39 44. Gallo LC, Penedo FJ, Espinosa de los Monteros K, Arguelles W. Resiliency in the face of  
40 disadvantage: do Hispanic cultural characteristics protect health outcomes? *J Pers* 2009;77:1707-  
41 46.
- 42  
43  
44  
45  
46  
47  
48  
49  
50  
51  
52  
53  
54  
55  
56  
57  
58  
59  
60

- 1  
2  
3 45. Gallo LC, de Los Monteros KE, Allison M, et al. Do socioeconomic gradients in  
4 subclinical atherosclerosis vary according to acculturation level? Analyses of Mexican-  
5 Americans in the multi-ethnic study of atherosclerosis. *Psychosom Med* 2009;71:756-62.  
6  
7  
8 46. Peng BL, Zou GY, Chen W, Lin YW, Ling L. Association between health service  
9 utilisation of internal migrant children and parents' acculturation in Guangdong, China: a  
10 cross-sectional study. *BMJ Open* 2018;8:e018844.  
11  
12  
13 47. McClure LA, Zheng DD, Lam BL, et al. Factors Associated With Ocular Health Care  
14 Utilization Among Hispanics/Latinos: Results From an Ancillary Study to the Hispanic  
15 Community Health Study/Study of Latinos (HCHS/SOL). *JAMA Ophthalmol* 2016;134:320-9.  
16  
17  
18 48. Davila YR, Reifsnider E, Pecina I. Familismo: influence on Hispanic health behaviors.  
19 *Appl Nurs Res* 2011;24:e67-72.  
20  
21  
22 49. Sabogal F, Marin G, Otero-Sabogal R, Marin B. Hispanic familism and acculturation:  
23 What changes and what doesn't? *Hispanic Journal of Behavioral Sciences* 1987;9:397-412.  
24  
25  
26 50. Miranda A, Estrada D, Firpo-Jimenez M. Differences in family cohesion, adaptability,  
27 and environment among Latino families in dissimilar stages of acculturation. *The Family*  
28 *Journal* 2000;8:341-50.  
29  
30  
31 51. Rodriguez N, Mira C, Paez N, Myers H. Exploring the complexities of familism and  
32 acculturation: central constructs for people of Mexican origin. *Am J Community Psychol*  
33 2007;39:61-77.  
34  
35  
36  
37  
38  
39  
40  
41  
42  
43  
44  
45  
46  
47  
48  
49  
50  
51  
52  
53  
54  
55  
56  
57  
58  
59  
60

Table 1. ECHO-SOL Demographic and Clinical Characteristics (N = 1,818)†

| <b>Demographic Characteristics</b>                     | <b>[N (%)]</b>     |
|--------------------------------------------------------|--------------------|
| Women                                                  | 1187 (57.4)        |
| Age, [mean (SE)]                                       | 56.4 (0.37)        |
| High School Graduate or Higher                         | 726 (43.3)         |
| Annual Family Income > \$20,000                        | 787 (45.5)         |
| Marital Status                                         |                    |
| Single                                                 | 332 (18.8)         |
| Married/Partner                                        | 961 (53.2)         |
| Separated/Divorced/Widow                               | 522 (28.0)         |
| Health Insurance                                       | 1042 (60.1)        |
|                                                        |                    |
| <b>Short Acculturation Scale for Hispanics (SASH)</b>  | <b>[mean (SE)]</b> |
| Language Use Subscale                                  | 1.7 (0.05)         |
| Social Relations Subscale                              | 2.1 (0.03)         |
| Length of US residence                                 | [N (%)]            |
| <5 years                                               | 178 (13.6)         |
| 5-10 years                                             | 247 (15.2)         |
| 11-20                                                  | 385 (22.1)         |
| >20                                                    | 842 (49.1)         |
| Second generation or higher                            | 185 (9.3)          |
| English language preference                            | 225 (14.0)         |
| Age at migration [mean (SE)]                           | 34.0 (1.0)         |
| US born                                                | 163 (7.9)          |
|                                                        |                    |
| <b>Clinical Characteristics</b>                        | <b>[N (%)]</b>     |
| Hypertension                                           | 861 (50.0)         |
| Type 2 Diabetes                                        | 523 (28.4)         |
| Current Smoker                                         | 304 (17.6)         |
| Physical activity level low                            | 1227 (67.3)        |
| BMI $\geq 30$                                          | 822 (44.3)         |
| Current Alcohol Use                                    | 770 (43.5)         |
|                                                        |                    |
| <b>Echocardiographic Variables</b>                     | <b>[mean (SE)]</b> |
| Left Atrial Volume Index (<33 mL/m <sup>2</sup> )      | 23.0 (0.25)        |
| Relative Wall Thickness (0.22-0.42)                    | 0.40 (0.004)       |
| Left Ventricular Mass Index (45-105 g/m <sup>2</sup> ) | 82.7 (0.7)         |
| Ejection Fraction ( $\geq 55$ %)                       | 59.8 (0.2)         |
| E prime (e') (8-16 cm/s)                               | 8.1 (0.09)         |
| E/e' ( $\leq 12$ )                                     | 10.0 (0.12)        |
| Diastolic Dysfunction [N (%)]                          | 916 (51.9)         |

†N's presented are unweighted counts of total participants in the ECHO-SOL with each respective characteristic.

Percentages are weighted row percentages.

Normal values are provided for cardiac structure and function variables.



Table 2. Adjusted Analyses of Acculturation Measures with Cardiac Structure and Function.\*

|                                           | LVMI (g/m <sup>2</sup> )<br>β (p) | RWT<br>β (p)              | LAVI (mL/m <sup>2</sup> )<br>β (p) | LVEF (%)<br>β (p) | e' (cm/s)<br>β (p) | E/e'<br>β (p) |
|-------------------------------------------|-----------------------------------|---------------------------|------------------------------------|-------------------|--------------------|---------------|
| <b>Nativity</b>                           |                                   |                           |                                    |                   |                    |               |
| Age, sex                                  | —                                 | —                         | —                                  | —                 | -0.349 (0.12)      | 0.571 (0.02)  |
| Model 1                                   | —                                 | —                         | —                                  | —                 | -0.320 (0.10)      | 0.524 (0.02)  |
| Model 2                                   | —                                 | —                         | —                                  | —                 | -0.324 (0.14)      | 0.532 (0.02)  |
| Model 3                                   | —                                 | —                         | —                                  | —                 | -0.303 (0.12)      | 0.503 (0.02)  |
| <b>Foreign Born<br/>(Years in the US)</b> |                                   |                           |                                    |                   |                    |               |
| Age, sex                                  | —                                 | 0.020 (0.06); all (0.03)  | 1.57 (0.02); all (<0.05)           | —                 | —                  | —             |
| Model 1                                   | —                                 | 0.022 (0.02); all (0.02)  | 1.63 (0.02); all (<0.05)           | —                 | —                  | —             |
| Model 2                                   | —                                 | 0.018 (0.06); all (0.02)  | 1.55 (0.02); all (0.05)            | —                 | —                  | —             |
| Model 3                                   | —                                 | 0.021 (0.02); all (0.007) | 1.71 (0.01); all (0.04)            | —                 | —                  | —             |
| <b>Generation</b>                         |                                   |                           |                                    |                   |                    |               |
| Age, sex                                  | —                                 | —                         | -0.468 (0.21)                      | —                 | -0.529 (0.01)      | 0.710 (0.002) |
| Model 1                                   | —                                 | —                         | -1.797 (0.004)                     | —                 | -0.447 (0.01)      | 0.594 (0.003) |
| Model 2                                   | —                                 | —                         | -1.444 (0.03)                      | —                 | -0.499 (0.01)      | 0.671 (0.003) |
| Model 3                                   | —                                 | —                         | -1.584 (0.01)                      | —                 | -0.425 (0.02)      | 0.575 (0.006) |
| <b>SASH Language</b>                      |                                   |                           |                                    |                   |                    |               |
| Age, sex                                  | —                                 | —                         | 0.580 (0.01)                       | —                 | 0.125 (0.10)       | —             |
| Model 1                                   | —                                 | —                         | 0.610 (0.008)                      | —                 | 0.097 (0.11)       | —             |
| Model 2                                   | —                                 | —                         | 0.546 (0.01)                       | —                 | 0.123 (0.15)       | —             |
| Model 3                                   | —                                 | —                         | 0.590 (0.007)                      | —                 | 0.095 (0.16)       | —             |
| <b>Age at Immigration</b>                 |                                   |                           |                                    |                   |                    |               |
| Age, sex                                  | —                                 | 0.0005 (0.15)             | -0.040 (0.008)                     | —                 | -0.005 (0.27)      | —             |
| Model 1                                   | —                                 | 0.0005 (0.13)             | -0.040 (0.008)                     | —                 | -0.006 (0.14)      | —             |
| Model 2                                   | —                                 | 0.0004 (0.15)             | -0.038 (<0.001)                    | —                 | -0.005 (0.37)      | —             |
| Model 3                                   | —                                 | 0.0004 (0.13)             | -0.038 (0.01)                      | —                 | -0.005 (0.22)      | —             |

\*Only acculturation measures that were significant in unadjusted analyses were analyzed in multivariable adjusted models.

For Years in the US, the 1<sup>st</sup> p-value reflects <5 years vs. >20 years comparison; whereas the 2<sup>nd</sup> p-value is for overall comparison across all the Years in the US categories (<5; 5-10; 11-20; >20) Model 1: Age, Sex, Diabetes, Hypertension, Obesity | Model 2: Age, Sex, Physical Activity, Tobacco, Alcohol Use | Model 3: Model 1 + Model 2

LVMI = Left ventricular mass index; RWT = Relative wall thickness; LAVI = Left atrial volume index; LVEF = Left ventricular ejection fraction

e' = Mitral annular early diastolic velocity; E/e' = Ratio between early mitral inflow velocity and mitral annular early diastolic velocity

Table 3. Unadjusted and Adjusted<sup>‡</sup> Analyses of Acculturation Measures with Diastolic Dysfunction.

|                            |                   | Adjusted Sequential Models |                   |                  |                   |
|----------------------------|-------------------|----------------------------|-------------------|------------------|-------------------|
|                            | Unadjusted        | Age, Sex                   | Model 1           | Model 2          | Model 3           |
| <b>Nativity</b>            |                   |                            |                   |                  |                   |
| Foreign born               | 1.67 (1.08-2.58)  | 0.98 (0.62-1.55)           | 0.94 (0.59-1.51)  | 0.98 (0.62-1.55) | 0.95 (0.59-1.53)  |
| US born                    | Ref               |                            |                   |                  |                   |
| <b>Years in the US</b>     |                   |                            |                   |                  |                   |
| <5                         | 0.86 (0.60-1.24)  | —                          | —                 | —                | —                 |
| 5-10                       | 0.72 (0.49-1.04)  |                            |                   |                  |                   |
| 11-20                      | 0.91 (0.61-1.37)  |                            |                   |                  |                   |
| >20                        | Ref               |                            |                   |                  |                   |
| <b>Generation</b>          |                   |                            |                   |                  |                   |
| 1                          | 1.90 (1.24-2.92)  | 1.29 (0.77-2.14)           | 1.18 (0.74-1.91)  | 1.26(0.77-2.06)  | 1.18 (0.73-1.89)  |
| 2                          | Ref               |                            |                   |                  |                   |
| <b>Language Preference</b> |                   |                            |                   |                  |                   |
| English                    | 0.67 (0.34-1.32)  | —                          | —                 | —                | —                 |
| Spanish                    | Ref               |                            |                   |                  |                   |
|                            |                   |                            |                   |                  |                   |
| <b>SASH Language</b>       | 0.81 (0.67-0.98)  | —                          | —                 | —                | —                 |
| <b>SASH Social</b>         | 0.88 (0.68-1.15)  | —                          | —                 | —                | —                 |
| <b>Age at Immigration</b>  | 1.02 (1.004-1.03) | 1.00 (0.99-1.02)           | 1.01 (0.995-1.02) | 1.01 (0.99-1.02) | 1.01 (0.995-1.02) |

<sup>‡</sup>Only acculturation measures that were significant in unadjusted analyses were analyzed in adjusted models.

ORs (95% CIs) are presented

Model 1: Age, Sex, Diabetes, Hypertension, Obesity

Model 2: Age, Sex, Physical Activity, Tobacco, Alcohol Use

Model 3: Model 1 + Model 2

1  
2  
3 Figure Legend:  
4  
5

6 Figure 1. Proposed Relationships Between Acculturation with Cardiac Structure and Function.  
7

8 Figure 2. Relation of Years Residing in the US or Income Level with Number of Physician Visits  
9  
10  
11  
12  
13  
14  
15  
16  
17  
18  
19  
20  
21  
22  
23  
24  
25  
26  
27  
28  
29  
30  
31  
32  
33  
34  
35  
36  
37  
38  
39  
40  
41  
42  
43  
44  
45  
46  
47

For peer review only

1  
2  
3  
4  
5  
6  
7  
8  
9  
10  
11  
12  
13  
14  
15  
16  
17  
18  
19  
20  
21  
22  
23  
24  
25  
26  
27  
28  
29  
30  
31  
32  
33  
34  
35  
36  
37  
38  
39  
40  
41

Figure 1.

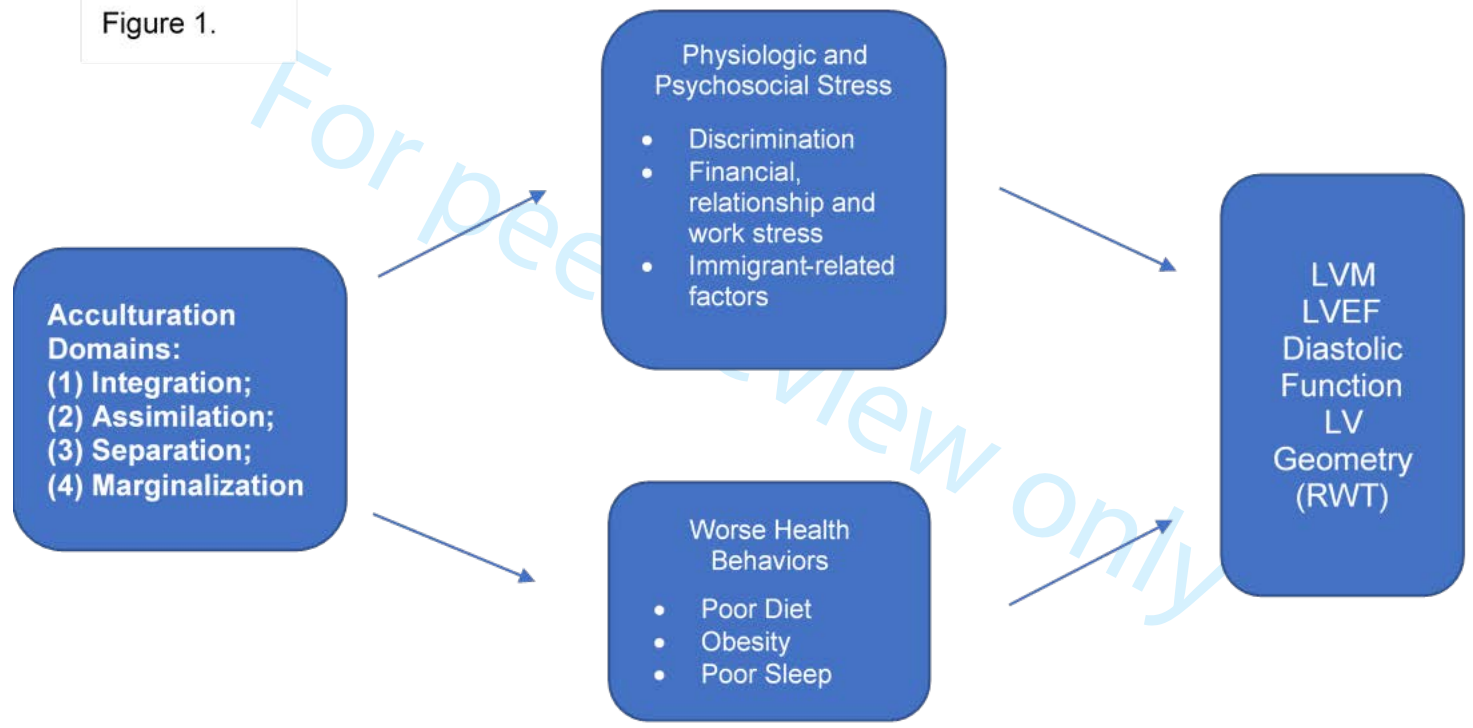

Figure 2.

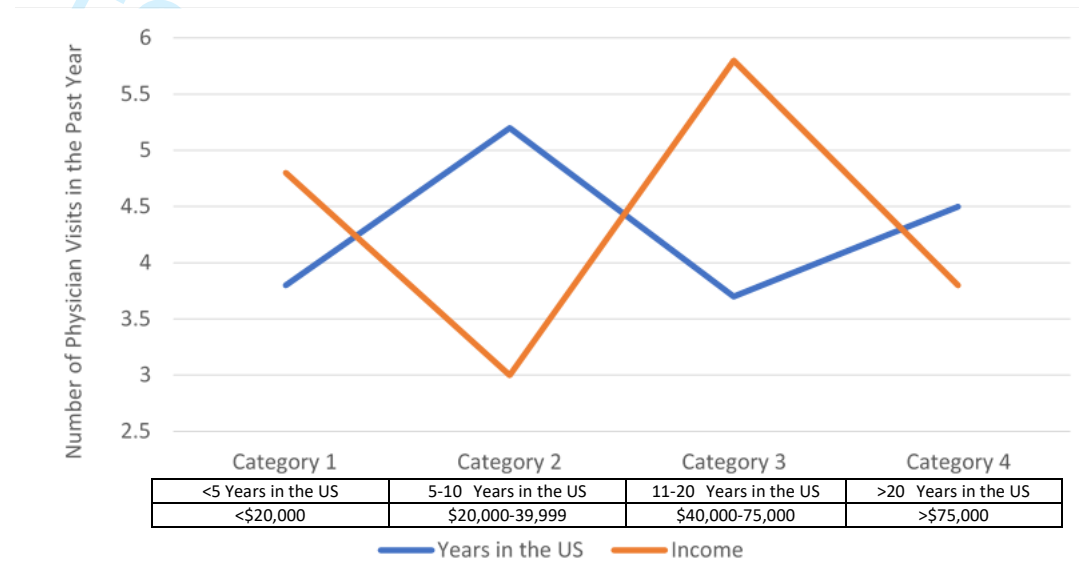

1  
2  
3  
4  
5  
6  
7  
8  
9  
10  
11  
12  
13  
14  
15  
16  
17  
18  
19  
20  
21  
22  
23  
24  
25  
26  
27  
28  
29  
30  
31  
32  
33  
34  
35  
36  
37  
38  
39  
40  
41

Table S1. Unadjusted Acculturation Measures with Echocardiographic Measures of Cardiac Structure and Function.

|                             | LVMI (g/m <sup>2</sup> ) |      | RWT                |      | LAVI (mL/m <sup>2</sup> ) |      | LVEF (%)          |      | e' (cm/s)         |        | E/e'              |        |
|-----------------------------|--------------------------|------|--------------------|------|---------------------------|------|-------------------|------|-------------------|--------|-------------------|--------|
| <b>Categorical Measures</b> |                          |      |                    |      |                           |      |                   |      |                   |        |                   |        |
|                             | Mean                     | p    | Mean               | p    | Mean                      | p    | Mean              | p    | Mean              | p      | Mean              | p      |
| Nativity                    |                          |      |                    |      |                           |      |                   |      |                   |        |                   |        |
| Foreign Born                | 82.74                    | 0.92 | 0.40               | 0.07 | 22.93                     | 0.10 | 59.83             | 0.54 | 7.98              | <0.001 | 10.1              | <0.001 |
| US Born                     | 82.54                    |      | 0.38               |      | 24.10                     |      | 59.50             |      | 8.99              |        | 8.8               |        |
| Years in US                 |                          |      |                    |      |                           |      |                   |      |                   |        |                   |        |
| <5 years                    | 79.80                    | 0.16 | 0.41               | 0.03 | 21.70                     | 0.03 | 59.94             | 0.09 | 7.71              | 0.11   | 10.2              | 0.25   |
| 5-10 years                  | 80.43                    |      | 0.39               |      | 22.40                     |      | 60.04             |      | 8.18              |        | 9.7               |        |
| 11-20 years                 | 83.60                    |      | 0.41               |      | 22.82                     |      | 58.94             |      | 8.27              |        | 9.8               |        |
| >20 years                   | 83.96                    |      | 0.39               |      | 23.50                     |      | 60.14             |      | 7.86              |        | 10.2              |        |
| Generation                  |                          |      |                    |      |                           |      |                   |      |                   |        |                   |        |
| First                       | 82.69                    | 0.88 | 0.40               | 0.08 | 22.89                     | 0.02 | 59.84             | 0.45 | 7.97              | <0.001 | 10.1              | <0.001 |
| Second or Greater           | 82.96                    |      | 0.38               |      | 24.41                     |      | 59.45             |      | 9.01              |        | 8.8               |        |
| Language                    |                          |      |                    |      |                           |      |                   |      |                   |        |                   |        |
| English                     | 81.51                    | 0.59 | 0.38               | 0.08 | 24.00                     | 0.06 | 60.13             | 0.48 | 8.52              | 0.15   | 9.7               | 0.64   |
| Spanish                     | 82.92                    |      | 0.40               |      | 22.87                     |      | 59.75             |      | 7.99              |        | 10.0              |        |
| <b>Continuous Measures</b>  |                          |      |                    |      |                           |      |                   |      |                   |        |                   |        |
|                             | $\beta$ (se)             | p    | $\beta$ (se)       | p    | $\beta$ (se)              | p    | $\beta$ (se)      | p    | $\beta$ (se)      | p      | $\beta$ (se)      | p      |
| Age at Immigration          | -0.0003<br>(0.0632)      | 0.99 | 0.0006<br>(0.0003) | 0.02 | -0.030<br>(0.014)         | 0.03 | -0.003<br>(0.012) | 0.79 | -0.023<br>(0.007) | 0.001  | 0.012<br>(0.010)  | 0.23   |
| SASH Subscales              |                          |      |                    |      |                           |      |                   |      |                   |        |                   |        |
| Language                    | 0.087<br>(0.735)         | 0.91 | -0.005<br>(0.003)  | 0.10 | 0.539<br>(0.237)          | 0.02 | 0.166<br>(0.180)  | 0.36 | 0.255<br>(0.098)  | 0.009  | -0.205<br>(0.109) | 0.06   |
| Social Relations            | 0.086<br>(1.392)         | 0.95 | -0.009<br>(0.006)  | 0.15 | 0.732<br>(0.373)          | 0.05 | 0.539<br>(0.295)  | 0.07 | 0.266<br>(0.155)  | 0.09   | -0.156<br>(0.217) | 0.47   |

LVMI = Left ventricular mass index; RWT = Relative wall thickness; LAVI = Left atrial volume index

LVEF = Left ventricular ejection fraction; e' = Mitral annular early diastolic velocity

E/e' = Ratio between early mitral inflow velocity and mitral annular early diastolic velocity

Table S2. Income Stratified Adjusted Analyses of Acculturation Measures with Cardiac Structure and Function.<sup>‡</sup>

|                            | LVMI (g/m <sup>2</sup> ) |      |           |       | LAVI (mL/m <sup>2</sup> ) |      |           |      | e' (cm/s) |        |           |       | E/e'      |       |           |       | Diastolic Dysfunction |              |
|----------------------------|--------------------------|------|-----------|-------|---------------------------|------|-----------|------|-----------|--------|-----------|-------|-----------|-------|-----------|-------|-----------------------|--------------|
|                            | <\$20,000                |      | >\$20,000 |       | <\$20,000                 |      | >\$20,000 |      | <\$20,000 |        | >\$20,000 |       | <\$20,000 |       | >\$20,000 |       | <\$20,000             | >\$20,000    |
|                            | Mean                     | p    | Mean      | p     | Mean                      | p    | Mean      | p    | Mean      | p      | Mean      | p     | Mean      | p     | Mean      | p     | ORs (95% CI)          | ORs (95% CI) |
| <b>Nativity</b>            |                          |      |           |       |                           |      |           |      |           |        |           |       |           |       |           |       |                       |              |
| Foreign                    | —                        | —    | —         | —     | —                         | —    | —         | —    | 7.90      | 0.0006 | 8.24      | 0.048 | —         | —     | —         | —     | 1.67 (0.89-           | 1.24 (0.70-  |
| US born                    |                          |      |           |       |                           |      |           |      | 8.83      |        | 8.99      |       |           |       |           |       | 3.14)                 | 2.19)        |
| <b>Years in the US</b>     |                          |      |           |       |                           |      |           |      |           |        |           |       |           |       |           |       |                       |              |
| <5                         | 80.02                    |      | 73.35     |       |                           |      |           |      | 7.70      |        | 9.03      |       | 10.20     |       | 9.17      |       |                       |              |
| 5-10                       | 81.32                    | 0.15 | 79.38     | 0.002 | —                         | —    | —         | —    | 7.72      | 0.27   | 8.87      | 0.001 | 10.36     | 0.62  | 8.63      | 0.003 | —                     | —            |
| 11-20                      | 82.22                    |      | 86.12     |       |                           |      |           |      | 8.23      |        | 8.56      |       | 9.912     |       | 9.49      |       |                       |              |
| >20                        | 85.73                    |      | 82.23     |       |                           |      |           |      | 7.87      |        | 7.89      |       | 10.28     |       | 10.16     |       |                       |              |
| <b>Generation</b>          |                          |      |           |       |                           |      |           |      |           |        |           |       |           |       |           |       |                       |              |
| 1                          | —                        | —    | —         | —     | 23.04                     | 0.45 | 22.85     | 0.02 | —         | —      | —         | —     | —         | —     | —         | —     | 1.82 (0.99-           | 1.50 (0.83-  |
| 2                          |                          |      |           |       | 23.91                     |      | 24.67     |      |           |        |           |       |           |       |           |       | 3.34)                 | 2.69)        |
| <b>Language Preference</b> |                          |      |           |       |                           |      |           |      |           |        |           |       |           |       |           |       |                       |              |
| English                    | —                        | —    | —         | —     | —                         | —    | —         | —    | —         | —      | —         | —     | 9.42      | 0.01  | 10.00     | 0.63  | —                     | —            |
| Spanish                    |                          |      |           |       |                           |      |           |      |           |        |           |       | 10.21     |       | 9.55      |       |                       |              |
|                            | β                        | p    | β         | p     | β                         | p    | β         | p    | β         | p      | β         | p     | β         | p     | β         | p     | —                     | —            |
| <b>SASH Language</b>       | —                        | —    | —         | —     | 0.2686                    | 0.32 | 0.7213    | 0.04 | —         | —      | —         | —     | -0.3026   | 0.003 | 0.1065    | 0.60  | —                     | —            |
| <b>SASH Social</b>         | —                        | —    | —         | —     | —                         | —    | —         | —    | —         | —      | —         | —     | -0.5410   | 0.008 | 0.4641    | 0.27  | —                     | —            |

<sup>‡</sup>Only statistically significant interactions were analyzed in adjusted models; excludes cases where income is missing.  
 Multivariable models were adjusted for Age, Sex, Diabetes, Hypertension, Obesity, Physical Activity, Tobacco, and Alcohol Use.  
 LVMI = Left ventricular mass index; LAVI = Left atrial volume index  
 e' = Mitral annular early diastolic velocity; E/e' = Ratio between early mitral inflow velocity and mitral annular early diastolic velocity

STROBE Statement—Checklist of items that should be included in reports of *Observational studies in epidemiology*

|                              | Item No | Recommendation                                                                                                                                                                                               | Page # |
|------------------------------|---------|--------------------------------------------------------------------------------------------------------------------------------------------------------------------------------------------------------------|--------|
| <b>Title and abstract</b>    | 1       | (a) Indicate the study's design with a commonly used term in the title or the abstract                                                                                                                       | 1&     |
|                              |         | (b) Provide in the abstract an informative and balanced summary of what was done and what was found                                                                                                          | 3&4    |
| <b>Introduction</b>          |         |                                                                                                                                                                                                              |        |
| Background/rationale         | 2       | Explain the scientific background and rationale for the investigation being reported                                                                                                                         | 4      |
| Objectives                   | 3       | State specific objectives, including any pre-specified hypotheses                                                                                                                                            | 4&5    |
| <b>Methods</b>               |         |                                                                                                                                                                                                              |        |
| Study design                 | 4       | Present key elements of study design early in the paper                                                                                                                                                      | 5      |
| Setting                      | 5       | Describe the setting, locations, and relevant dates, including periods of recruitment, exposure, follow-up, and data collection                                                                              | 5      |
| Participants                 | 6       | (a) Give the eligibility criteria, and the sources and methods of selection of participants. Describe methods of follow-up                                                                                   | 5      |
|                              |         | (b) For matched studies, give matching criteria and number of exposed and unexposed                                                                                                                          |        |
| Variables                    | 7       | Clearly define all outcomes, exposures, predictors, potential confounders, and effect modifiers. Give diagnostic criteria, if applicable                                                                     | 6&7    |
| Data sources/<br>measurement | 8*      | For each variable of interest, give sources of data and details of methods of assessment (measurement). Describe comparability of assessment methods if there is more than one group                         | 6&7    |
| Bias                         | 9       | Describe any efforts to address potential sources of bias                                                                                                                                                    | 8      |
| Study size                   | 10      | Explain how the study size was arrived at                                                                                                                                                                    | 5&9    |
| Quantitative variables       | 11      | Explain how quantitative variables were handled in the analyses. If applicable, describe which groupings were chosen and why                                                                                 | 6&7    |
| Statistical methods          | 12      | (a) Describe all statistical methods, including those used to control for confounding                                                                                                                        | 8&9    |
|                              |         | (b) Describe any methods used to examine subgroups and interactions                                                                                                                                          |        |
|                              |         | (c) Explain how missing data were addressed                                                                                                                                                                  |        |
|                              |         | (d) If applicable, explain how loss to follow-up was addressed                                                                                                                                               |        |
|                              |         | (e) Describe any sensitivity analyses                                                                                                                                                                        |        |
| <b>Results</b>               |         |                                                                                                                                                                                                              |        |
| Participants                 | 13*     | (a) Report numbers of individuals at each stage of study—eg numbers potentially eligible, examined for eligibility, confirmed eligible, included in the study, completing follow-up, and analysed            | 9      |
|                              |         | (b) Give reasons for non-participation at each stage                                                                                                                                                         |        |
|                              |         | (c) Consider use of a flow diagram                                                                                                                                                                           |        |
| Descriptive data             | 14*     | (a) Give characteristics of study participants (eg demographic, clinical, social) and information on exposures and potential confounders                                                                     | 9      |
|                              |         | (b) Indicate number of participants with missing data for each variable of interest                                                                                                                          |        |
|                              |         | (c) Summarise follow-up time (eg, average and total amount)                                                                                                                                                  |        |
| Outcome data                 | 15*     | Report numbers of outcome events or summary measures over time                                                                                                                                               | 10&11  |
| Main results                 | 16      | (a) Give unadjusted estimates and, if applicable, confounder-adjusted estimates and their precision (eg, 95% confidence interval). Make clear which confounders were adjusted for and why they were included | 10&11  |
|                              |         | (b) Report category boundaries when continuous variables were categorized                                                                                                                                    |        |
|                              |         | (c) If relevant, consider translating estimates of relative risk into absolute risk for a                                                                                                                    |        |



|    |                          |                        |                                                                                                                                                                            |
|----|--------------------------|------------------------|----------------------------------------------------------------------------------------------------------------------------------------------------------------------------|
| 1  |                          | meaningful time period |                                                                                                                                                                            |
| 2  | Other analyses           | 17                     | Report other analyses done—eg analyses of subgroups and interactions, and sensitivity analyses                                                                             |
| 3  |                          |                        | 11                                                                                                                                                                         |
| 4  |                          |                        |                                                                                                                                                                            |
| 5  | <b>Discussion</b>        |                        |                                                                                                                                                                            |
| 6  | Key results              | 18                     | Summarise key results with reference to study objectives                                                                                                                   |
| 7  |                          |                        | 12&13                                                                                                                                                                      |
| 8  | Limitations              | 19                     | Discuss limitations of the study, taking into account sources of potential bias or imprecision. Discuss both direction and magnitude of any potential bias                 |
| 9  |                          |                        | 16                                                                                                                                                                         |
| 10 | Interpretation           | 20                     | Give a cautious overall interpretation of results considering objectives, limitations, multiplicity of analyses, results from similar studies, and other relevant evidence |
| 11 |                          |                        | 14&15                                                                                                                                                                      |
| 12 | Generalizability         | 21                     | Discuss the generalizability (external validity) of the study results                                                                                                      |
| 13 |                          |                        | 16                                                                                                                                                                         |
| 14 | <b>Other information</b> |                        |                                                                                                                                                                            |
| 15 | Funding                  | 22                     | Give the source of funding and the role of the funders for the present study and, if applicable, for the original study on which the present article is based              |
| 16 |                          |                        | 1                                                                                                                                                                          |
| 17 |                          |                        |                                                                                                                                                                            |

\*Give information separately for exposed and unexposed groups.

**Note:** An Explanation and Elaboration article discusses each checklist item and gives methodological background and published examples of transparent reporting. The STROBE checklist is best used in conjunction with this article (freely available on the Web sites of PLoS Medicine at <http://www.plosmedicine.org/>, Annals of Internal Medicine at <http://www.annals.org/>, and Epidemiology at <http://www.epidem.com/>). Information on the STROBE Initiative is available at <http://www.strobe-statement.org>.
