# Supplementary material for: Association of acculturation with cardiac structure and function among Hispanics/Latinos: a cross-sectional analysis of the echocardiographic study of Latinos
Source: PubMed Central journal article supplement — BMJ Open. 2019 Nov 28;9(11):e028729. doi: 10.1136/bmjopen-2018-028729 (PMC6924788; doi:10.1136/bmjopen-2018-028729), 2019-11-28
Supplement: bmjopen-2018-028729supp001.pdf [file bmjopen-2018-028729supp001.pdf]

Table S1. Unadjusted Acculturation Measures with Echocardiographic Measures of Cardiac Structure and Function.

|                             | LVMI (g/m <sup>2</sup> ) |      | RWT                |      | LAVI (mL/m <sup>2</sup> ) |      | LVEF (%)          |      | e' (cm/s)         |        | E/e'              |        |
|-----------------------------|--------------------------|------|--------------------|------|---------------------------|------|-------------------|------|-------------------|--------|-------------------|--------|
| <b>Categorical Measures</b> |                          |      |                    |      |                           |      |                   |      |                   |        |                   |        |
|                             | Mean                     | p    | Mean               | p    | Mean                      | p    | Mean              | p    | Mean              | p      | Mean              | p      |
| Nativity                    |                          |      |                    |      |                           |      |                   |      |                   |        |                   |        |
| Foreign Born                | 82.74                    | 0.92 | 0.40               | 0.07 | 22.93                     | 0.10 | 59.83             | 0.54 | 7.98              | <0.001 | 10.1              | <0.001 |
| US Born                     | 82.54                    |      | 0.38               |      | 24.10                     |      | 59.50             |      | 8.99              |        | 8.8               |        |
| Years in US                 |                          |      |                    |      |                           |      |                   |      |                   |        |                   |        |
| <5 years                    | 79.80                    | 0.16 | 0.41               | 0.03 | 21.70                     | 0.03 | 59.94             | 0.09 | 7.71              | 0.11   | 10.2              | 0.25   |
| 5-10 years                  | 80.43                    |      | 0.39               |      | 22.40                     |      | 60.04             |      | 8.18              |        | 9.7               |        |
| 11-20 years                 | 83.60                    |      | 0.41               |      | 22.82                     |      | 58.94             |      | 8.27              |        | 9.8               |        |
| >20 years                   | 83.96                    |      | 0.39               |      | 23.50                     |      | 60.14             |      | 7.86              |        | 10.2              |        |
| Generation                  |                          |      |                    |      |                           |      |                   |      |                   |        |                   |        |
| First                       | 82.69                    | 0.88 | 0.40               | 0.08 | 22.89                     | 0.02 | 59.84             | 0.45 | 7.97              | <0.001 | 10.1              | <0.001 |
| Second or Greater           | 82.96                    |      | 0.38               |      | 24.41                     |      | 59.45             |      | 9.01              |        | 8.8               |        |
| Language                    |                          |      |                    |      |                           |      |                   |      |                   |        |                   |        |
| English                     | 81.51                    | 0.59 | 0.38               | 0.08 | 24.00                     | 0.06 | 60.13             | 0.48 | 8.52              | 0.15   | 9.7               | 0.64   |
| Spanish                     | 82.92                    |      | 0.40               |      | 22.87                     |      | 59.75             |      | 7.99              |        | 10.0              |        |
| <b>Continuous Measures</b>  |                          |      |                    |      |                           |      |                   |      |                   |        |                   |        |
|                             | $\beta$ (se)             | p    | $\beta$ (se)       | p    | $\beta$ (se)              | p    | $\beta$ (se)      | p    | $\beta$ (se)      | p      | $\beta$ (se)      | p      |
| Age at Immigration          | -0.0003<br>(0.0632)      | 0.99 | 0.0006<br>(0.0003) | 0.02 | -0.030<br>(0.014)         | 0.03 | -0.003<br>(0.012) | 0.79 | -0.023<br>(0.007) | 0.001  | 0.012<br>(0.010)  | 0.23   |
| SASH Subscales              |                          |      |                    |      |                           |      |                   |      |                   |        |                   |        |
| Language                    | 0.087<br>(0.735)         | 0.91 | -0.005<br>(0.003)  | 0.10 | 0.539<br>(0.237)          | 0.02 | 0.166<br>(0.180)  | 0.36 | 0.255<br>(0.098)  | 0.009  | -0.205<br>(0.109) | 0.06   |
| Social Relations            | 0.086<br>(1.392)         | 0.95 | -0.009<br>(0.006)  | 0.15 | 0.732<br>(0.373)          | 0.05 | 0.539<br>(0.295)  | 0.07 | 0.266<br>(0.155)  | 0.09   | -0.156<br>(0.217) | 0.47   |

LVMI = Left ventricular mass index; RWT = Relative wall thickness; LAVI = Left atrial volume index

LVEF = Left ventricular ejection fraction; e' = Mitral annular early diastolic velocity

E/e' = Ratio between early mitral inflow velocity and mitral annular early diastolic velocity

Table S2. Income Stratified Adjusted Analyses of Acculturation Measures with Cardiac Structure and Function.<sup>‡</sup>

|                            | LVMI (g/m <sup>2</sup> ) |      |           |       | LAVI (mL/m <sup>2</sup> ) |      |           |      | e' (cm/s) |        |           |       | E/e'      |       |           |       | Diastolic Dysfunction |              |
|----------------------------|--------------------------|------|-----------|-------|---------------------------|------|-----------|------|-----------|--------|-----------|-------|-----------|-------|-----------|-------|-----------------------|--------------|
|                            | <\$20,000                |      | >\$20,000 |       | <\$20,000                 |      | >\$20,000 |      | <\$20,000 |        | >\$20,000 |       | <\$20,000 |       | >\$20,000 |       | <\$20,000             | >\$20,000    |
|                            | Mean                     | p    | Mean      | p     | Mean                      | p    | Mean      | p    | Mean      | p      | Mean      | p     | Mean      | p     | Mean      | p     | ORs (95% CI)          | ORs (95% CI) |
| <b>Nativity</b>            |                          |      |           |       |                           |      |           |      |           |        |           |       |           |       |           |       |                       |              |
| Foreign                    | —                        | —    | —         | —     | —                         | —    | —         | —    | 7.90      | 0.0006 | 8.24      | 0.048 | —         | —     | —         | —     | 1.67 (0.89-           | 1.24 (0.70-  |
| US born                    |                          |      |           |       |                           |      |           |      | 8.83      |        | 8.99      |       |           |       |           |       | 3.14)                 | 2.19)        |
| <b>Years in the US</b>     |                          |      |           |       |                           |      |           |      |           |        |           |       |           |       |           |       |                       |              |
| <5                         | 80.02                    |      | 73.35     |       |                           |      |           |      | 7.70      |        | 9.03      |       | 10.20     |       | 9.17      |       |                       |              |
| 5-10                       | 81.32                    | 0.15 | 79.38     | 0.002 | —                         | —    | —         | —    | 7.72      | 0.27   | 8.87      | 0.001 | 10.36     | 0.62  | 8.63      | 0.003 | —                     | —            |
| 11-20                      | 82.22                    |      | 86.12     |       |                           |      |           |      | 8.23      |        | 8.56      |       | 9.912     |       | 9.49      |       |                       |              |
| >20                        | 85.73                    |      | 82.23     |       |                           |      |           |      | 7.87      |        | 7.89      |       | 10.28     |       | 10.16     |       |                       |              |
| <b>Generation</b>          |                          |      |           |       |                           |      |           |      |           |        |           |       |           |       |           |       |                       |              |
| 1                          | —                        | —    | —         | —     | 23.04                     | 0.45 | 22.85     | 0.02 | —         | —      | —         | —     | —         | —     | —         | —     | 1.82 (0.99-           | 1.50 (0.83-  |
| 2                          |                          |      |           |       | 23.91                     |      | 24.67     |      |           |        |           |       |           |       |           |       | 3.34)                 | 2.69)        |
| <b>Language Preference</b> |                          |      |           |       |                           |      |           |      |           |        |           |       |           |       |           |       |                       |              |
| English                    | —                        | —    | —         | —     | —                         | —    | —         | —    | —         | —      | —         | —     | 9.42      | 0.01  | 10.00     | 0.63  | —                     | —            |
| Spanish                    |                          |      |           |       |                           |      |           |      |           |        |           |       | 10.21     |       | 9.55      |       |                       |              |
|                            | β                        | p    | β         | p     | β                         | p    | β         | p    | β         | p      | β         | p     | β         | p     | β         | p     | —                     | —            |
| <b>SASH Language</b>       | —                        | —    | —         | —     | 0.2686                    | 0.32 | 0.7213    | 0.04 | —         | —      | —         | —     | -0.3026   | 0.003 | 0.1065    | 0.60  | —                     | —            |
| <b>SASH Social</b>         | —                        | —    | —         | —     | —                         | —    | —         | —    | —         | —      | —         | —     | -0.5410   | 0.008 | 0.4641    | 0.27  | —                     | —            |

<sup>‡</sup>Only statistically significant interactions were analyzed in adjusted models; excludes cases where income is missing.

Multivariable models were adjusted for Age, Sex, Diabetes, Hypertension, Obesity, Physical Activity, Tobacco, and Alcohol Use.

LVMI = Left ventricular mass index; LAVI = Left atrial volume index

e' = Mitral annular early diastolic velocity; E/e' = Ratio between early mitral inflow velocity and mitral annular early diastolic velocity
